# Supplementary material for: A time-resolved proteomic and diagnostic map characterizes COVID-19 disease progression and predicts outcome
Source: bioRxiv or medRxiv preprint supplement (doi:10.1101/2020.11.09.20228015), 2020-11-12

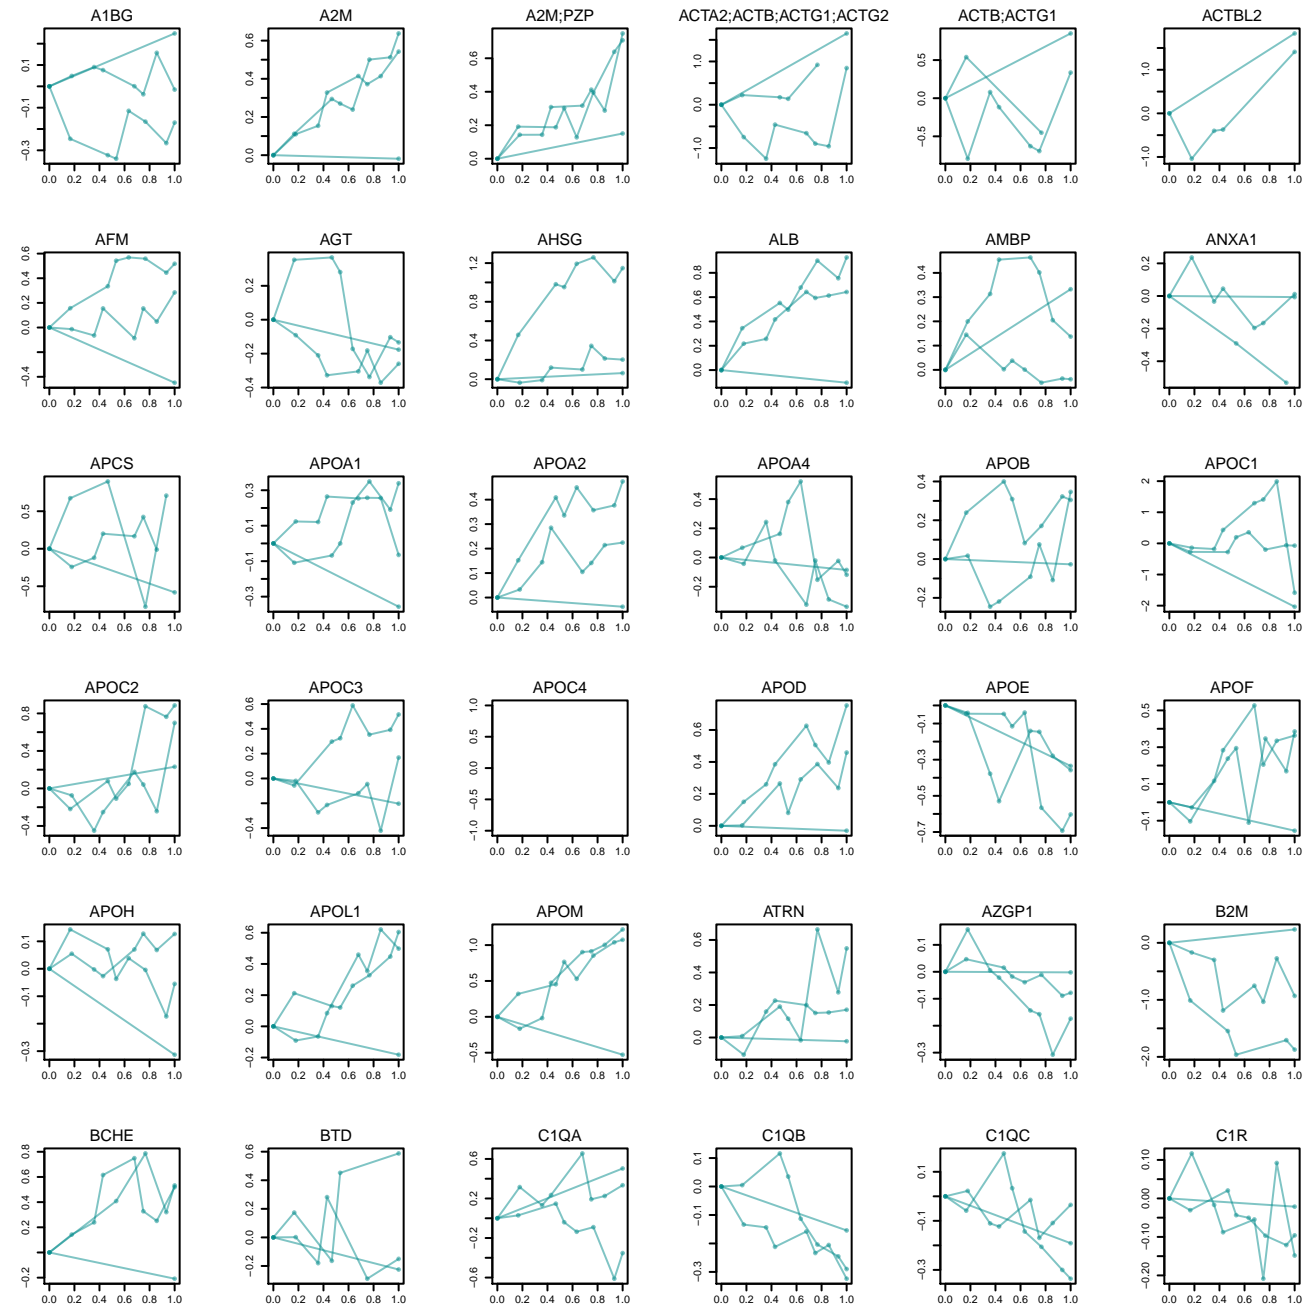

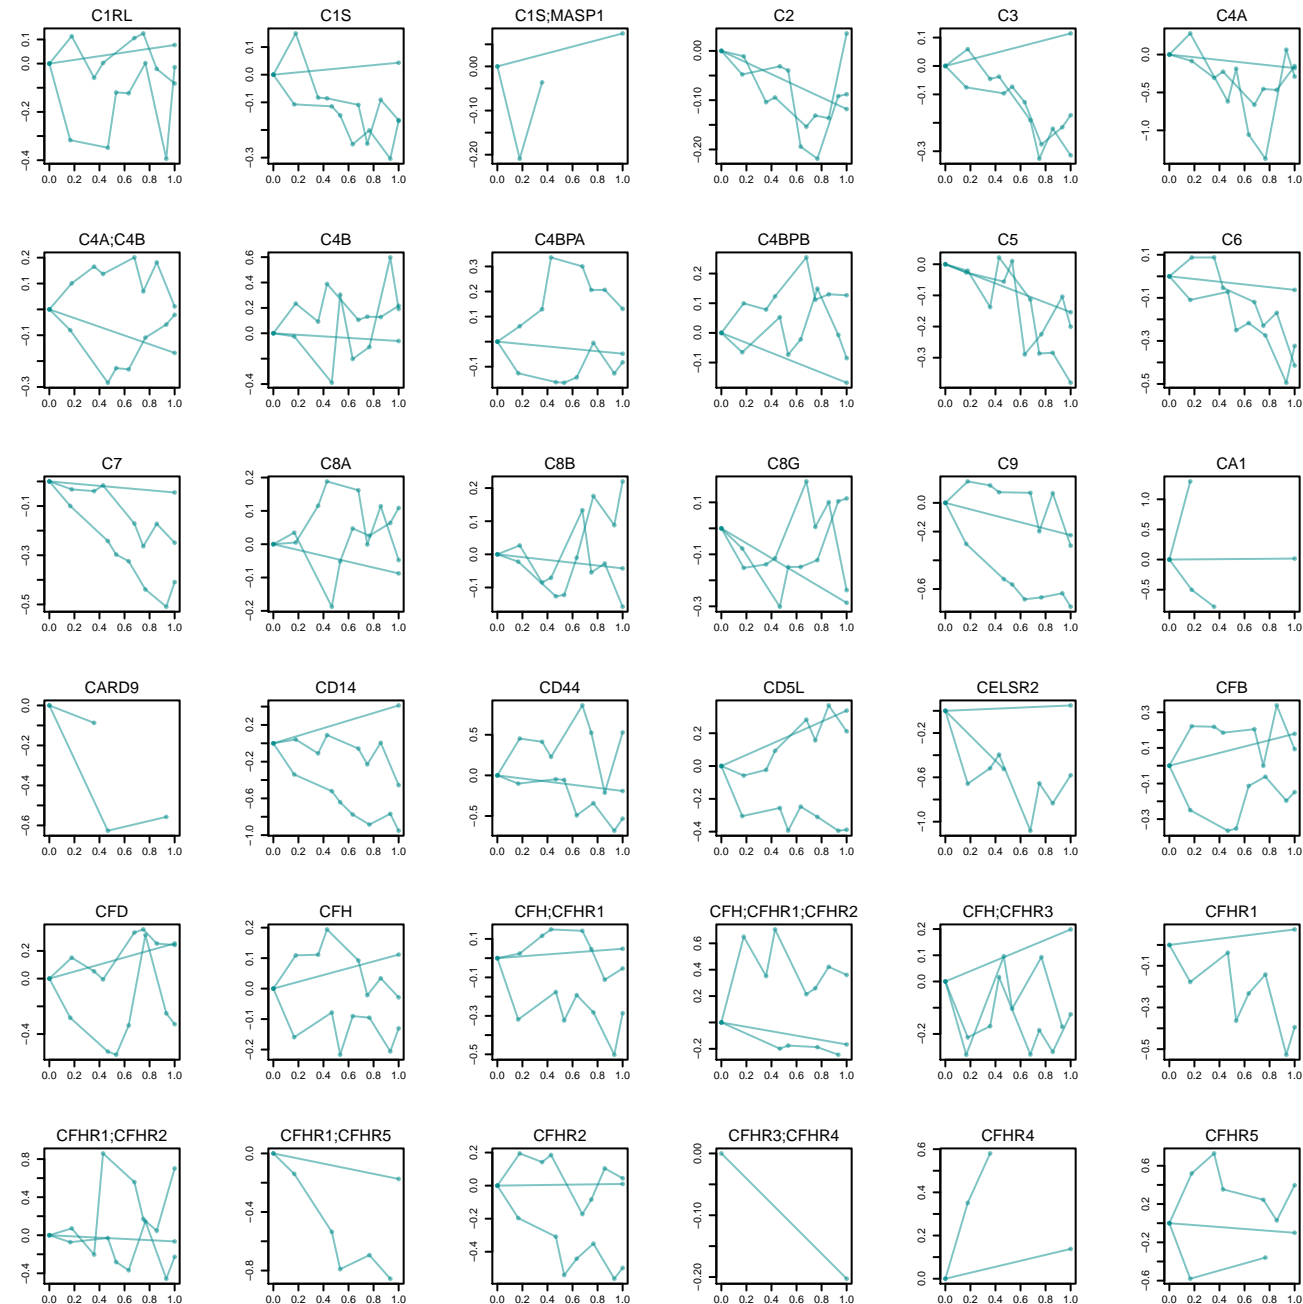

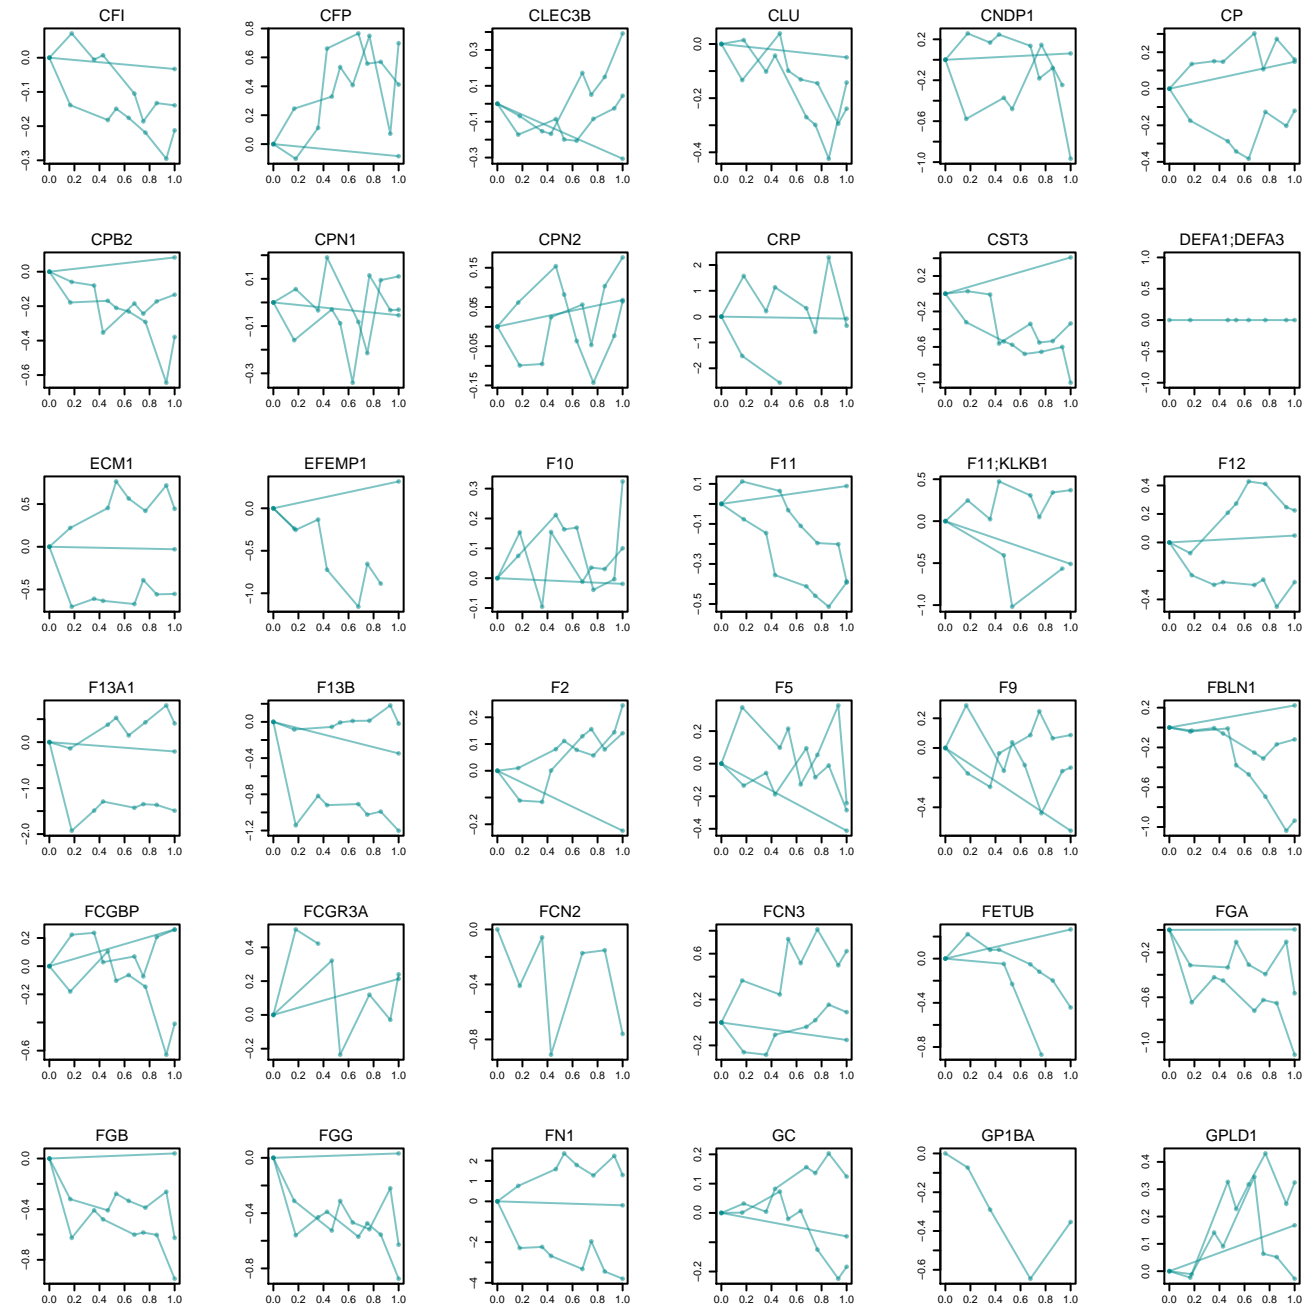

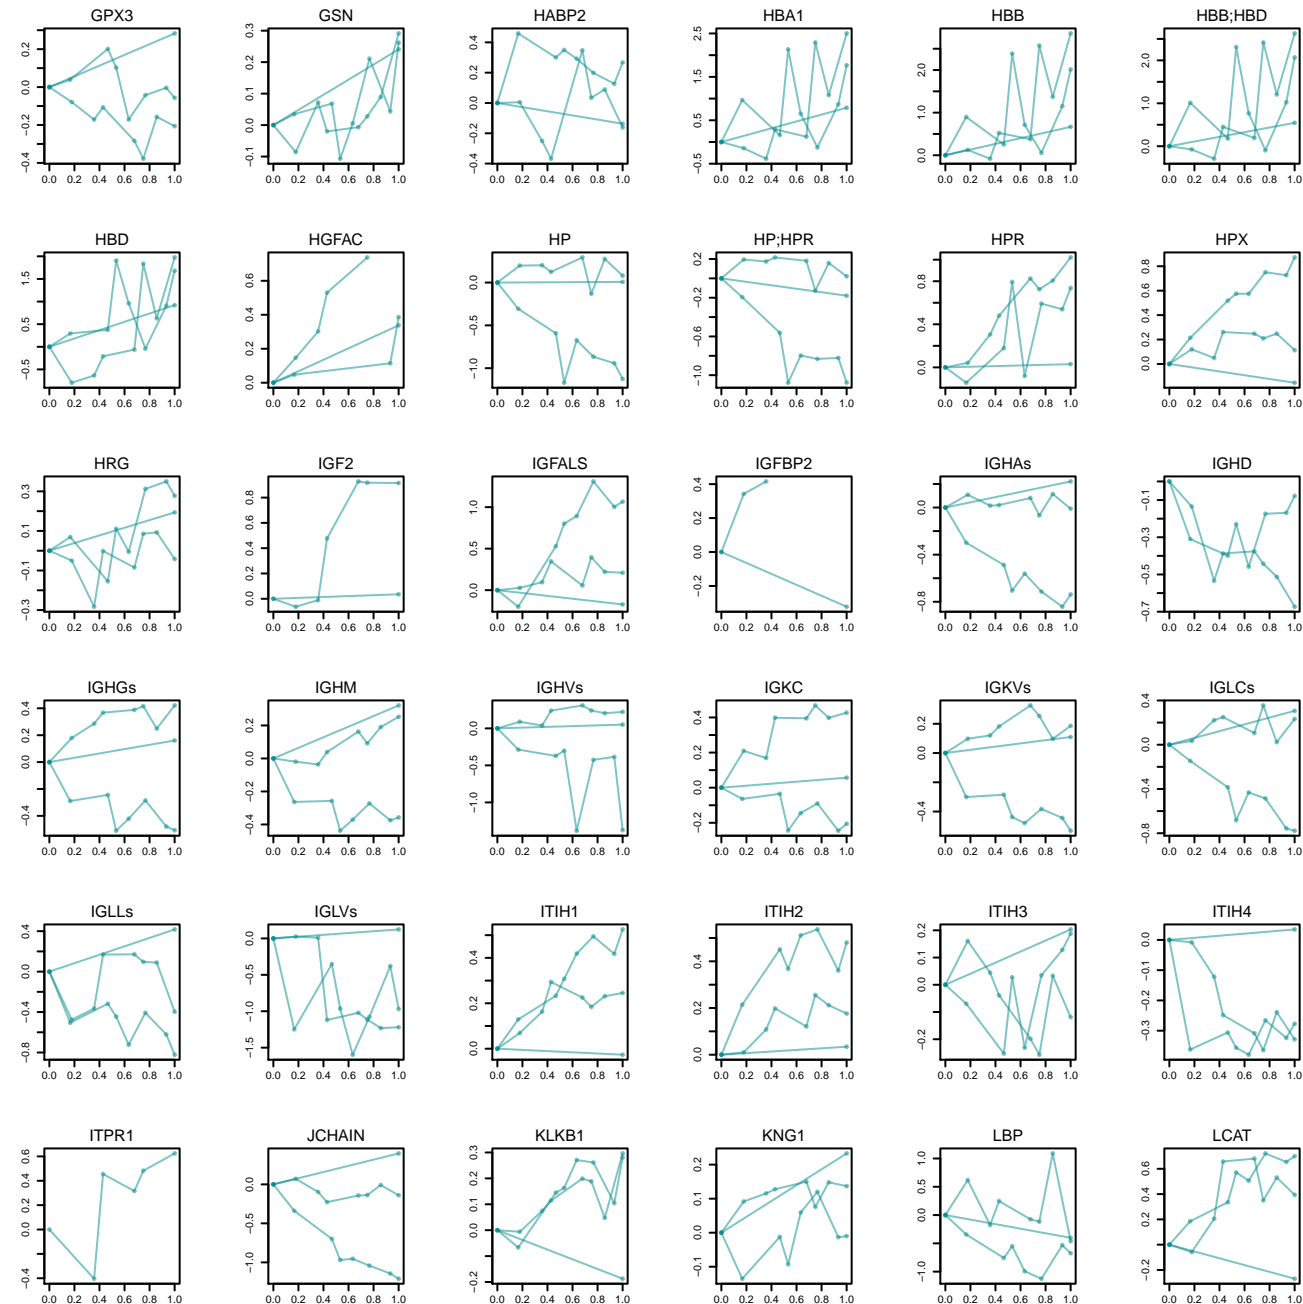

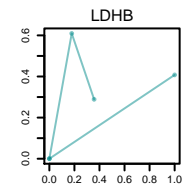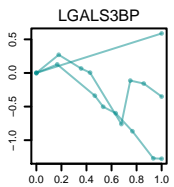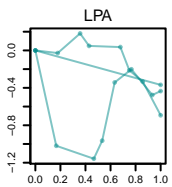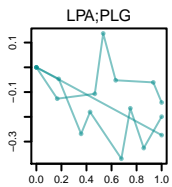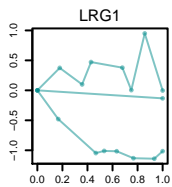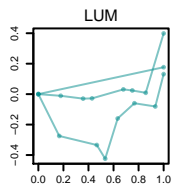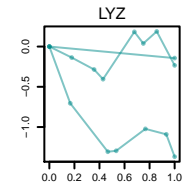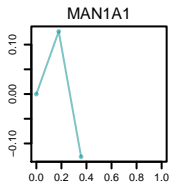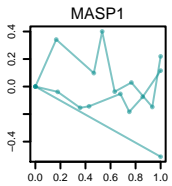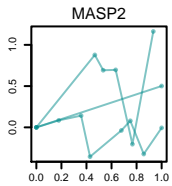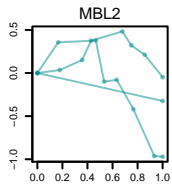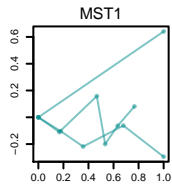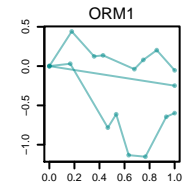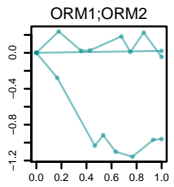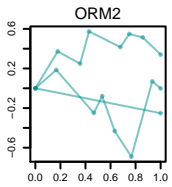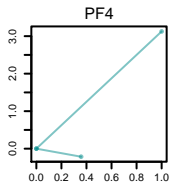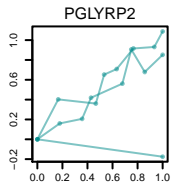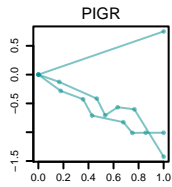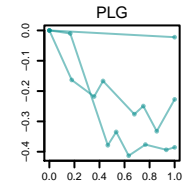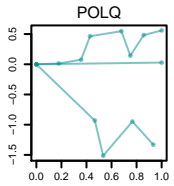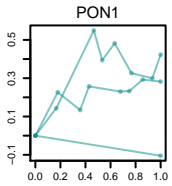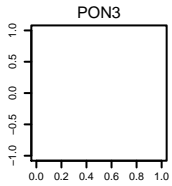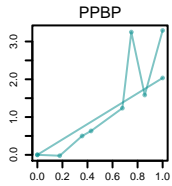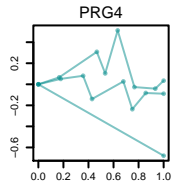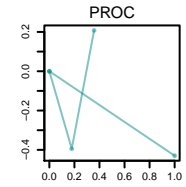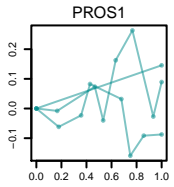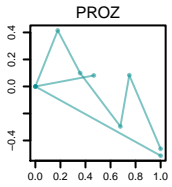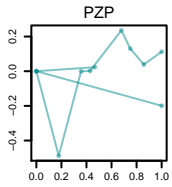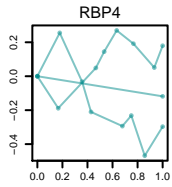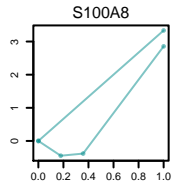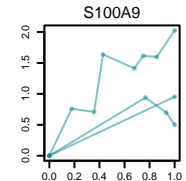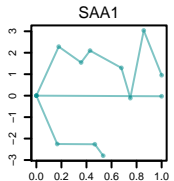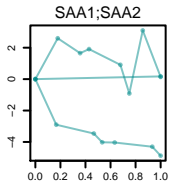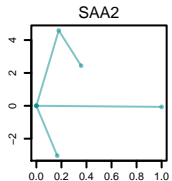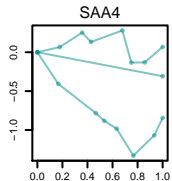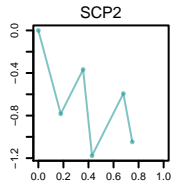

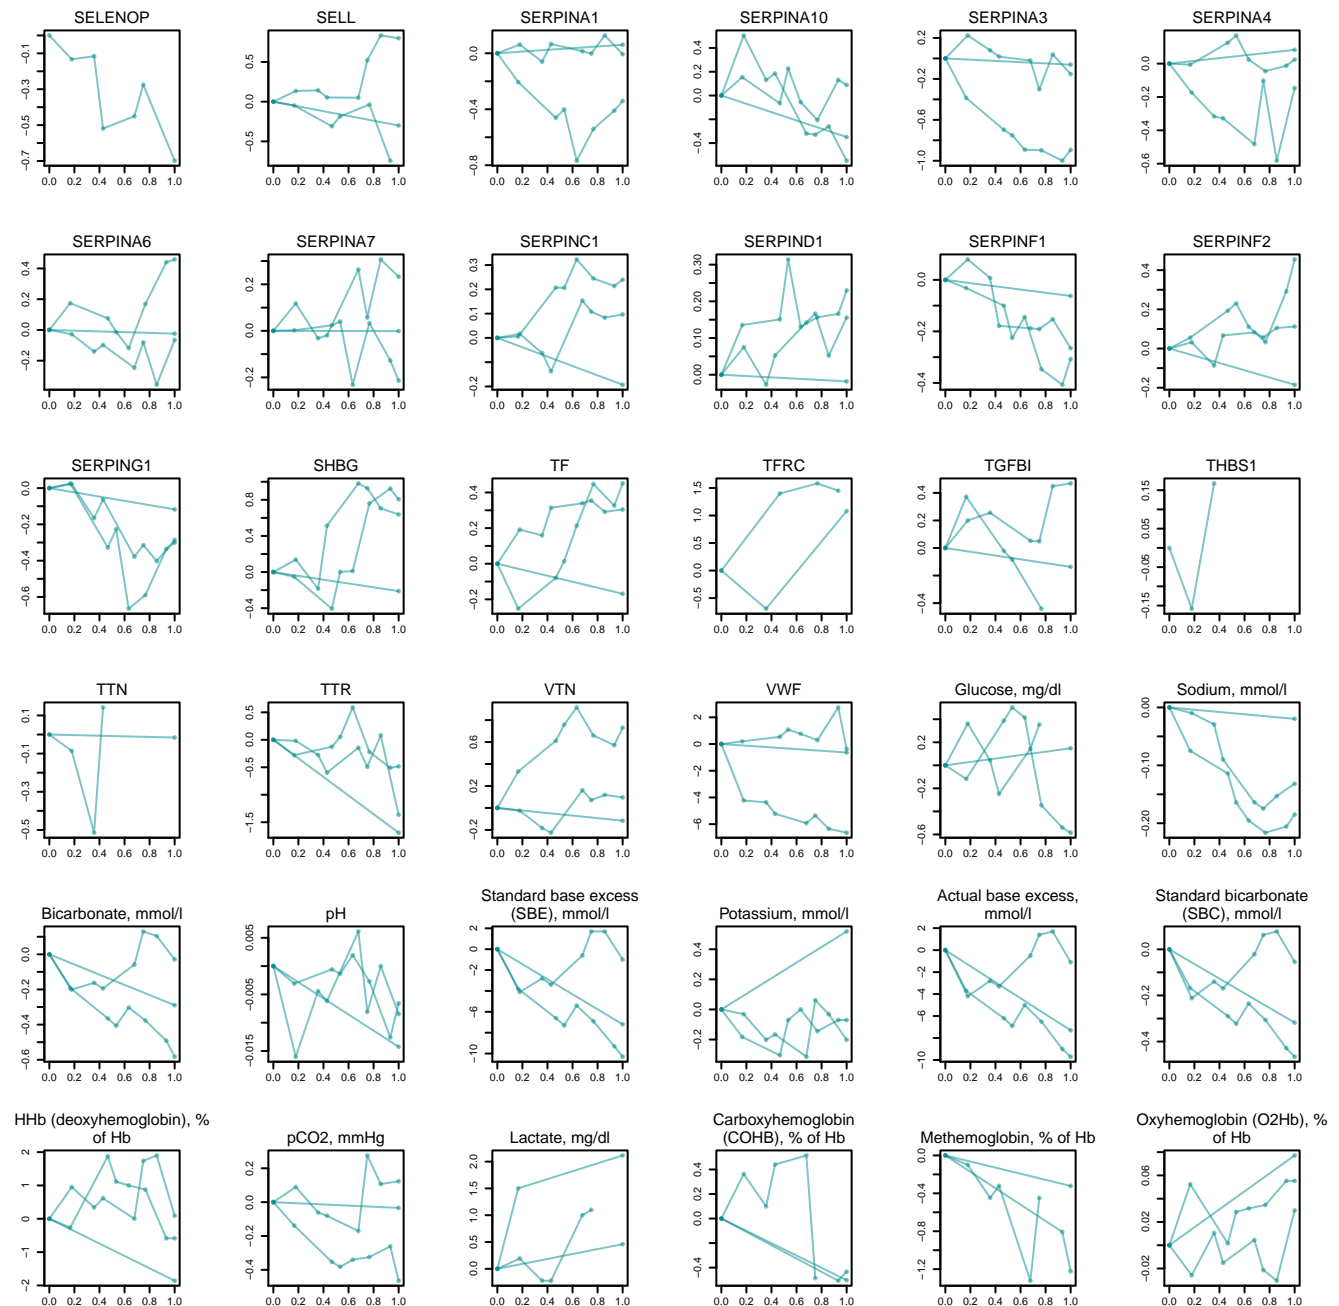

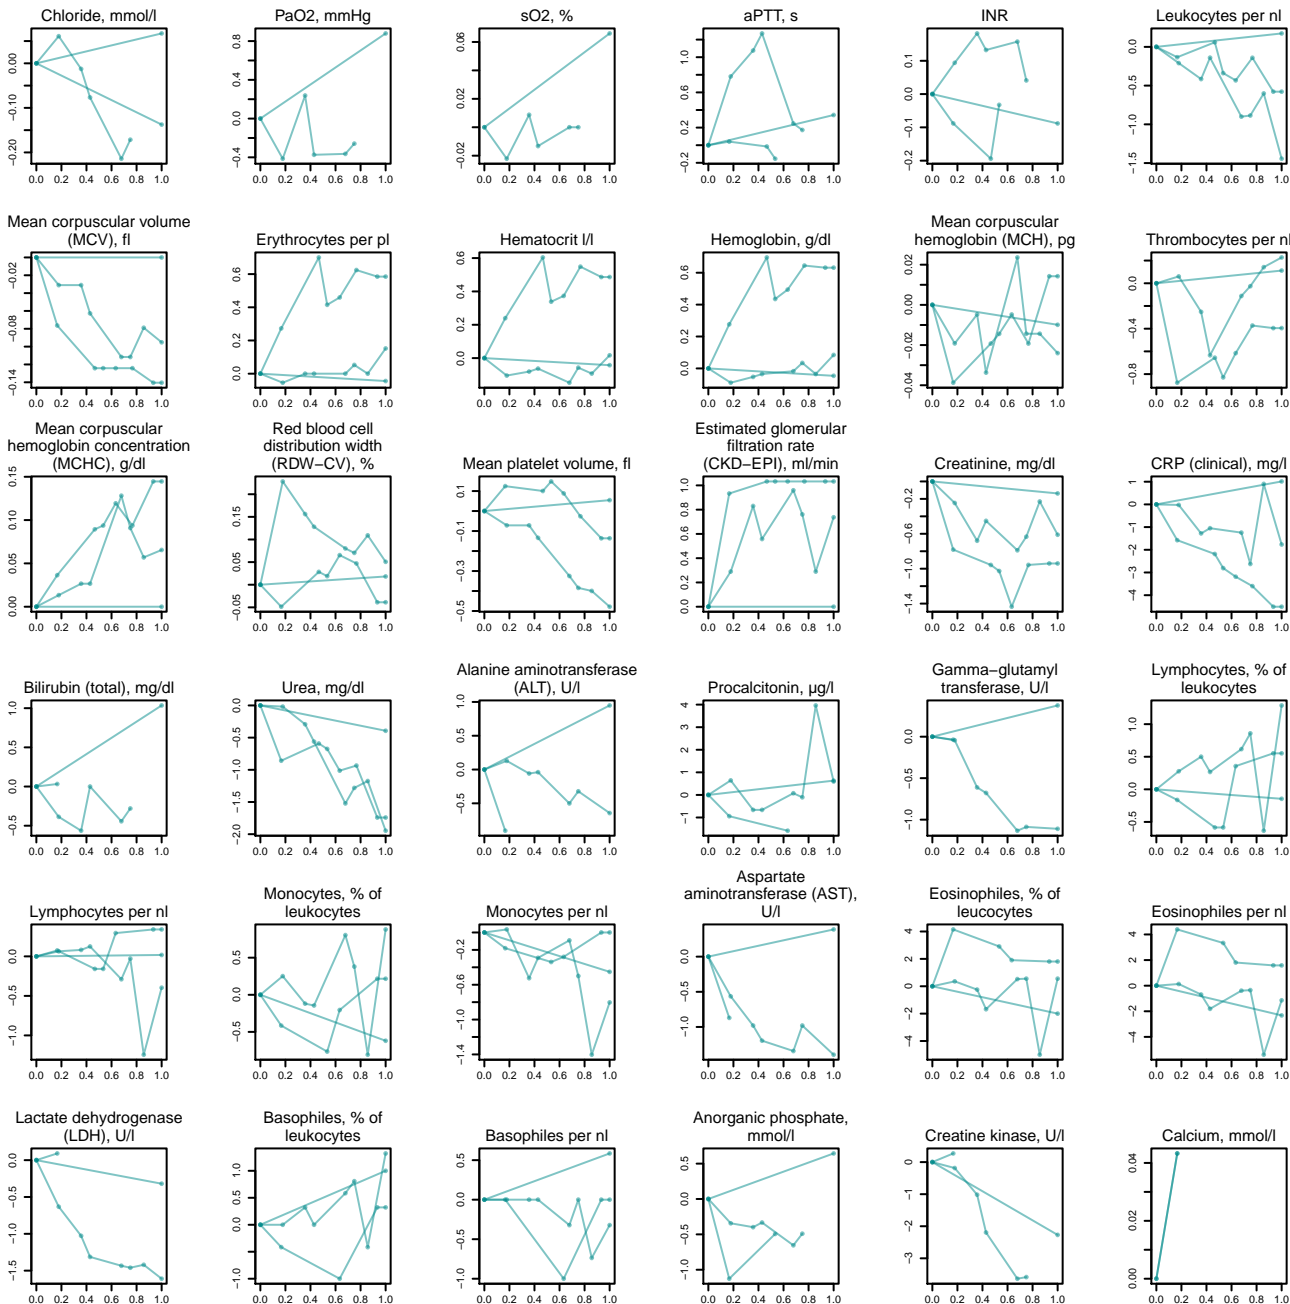

Immature granulocytes per nl

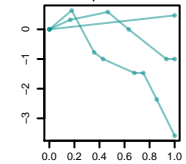

Immature granulocytes, % of leukocytes

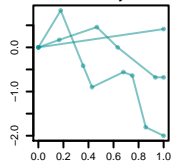

Neutrophils per nl

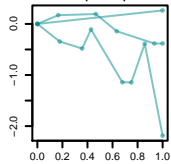

Neutrophils, % of leukocytes

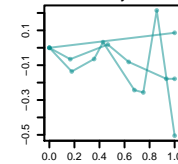

Alkaline phosphatase, U/l

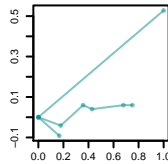

Albumin (clinical), g/l

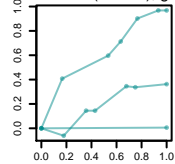

Erythroblasts per nl

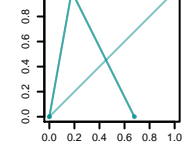

Fibrinogen (clinical), g/l

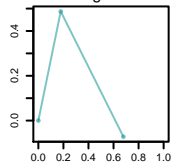

D-Dimer, mg/l

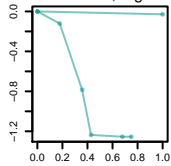

Ferritin, ug/l

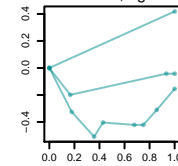

N-terminal pro b-type Natriuretic Peptide (NT-proBNP), ng/l

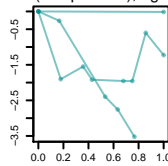

Creatine Kinase MB, U/l

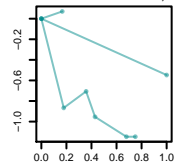

Creatine Kinase MB, % of Creatine Kinase

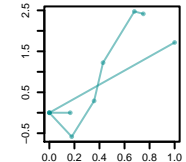

Antithrombin activity %

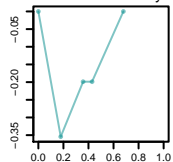

Interleukin-6, ng/l

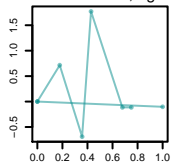

Haptoglobin (clinical), g/l

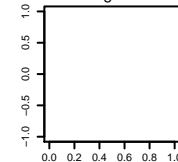

Magnesium, mmol/l

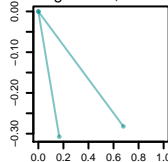

Lipase, U/l

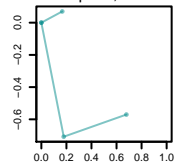

Troponin T HS, ng/l

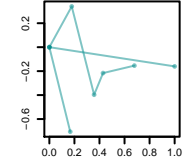

CD169/Siglec-1 antigens per monocyte

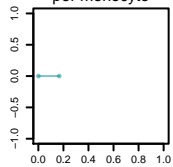

CD169+ monocytes, % of monocytes

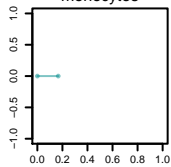

Highly fluorescent lymphocytes per µl

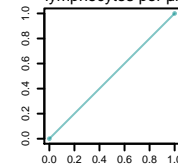

Basal TSH, mU/l

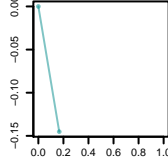

Reticulocyte hemoglobin equivalent, pg

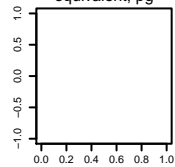

Reticulocyte production index (RPI)

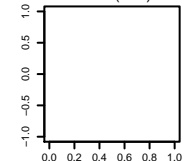

Reticulocytes per nl

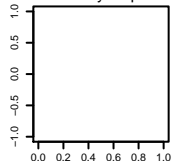

Reticulocytes, % of erythrocytes

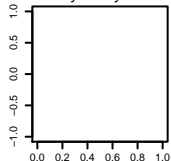

Neutrophil activity

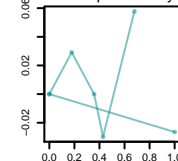

Neutrophil granularity intensity

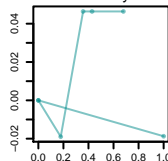

Segment core granulocytes, % of leukocytes

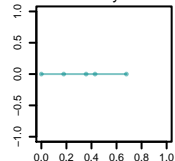

Neutrophil-to-lymphocyte ratio

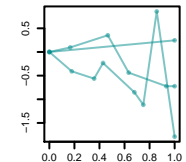

Age

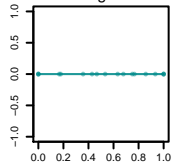

BMI

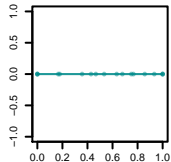

Charlson score

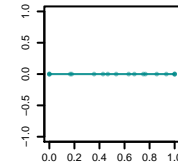

SOFA score

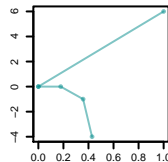

Horowitz index, mmHg

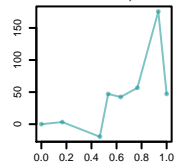



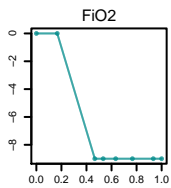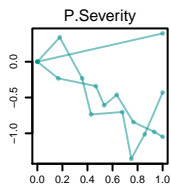

Supplement: Supplementary file [file media-1.zip]
