# Supplementary material for: A time-resolved proteomic and diagnostic map characterizes COVID-19 disease progression and predicts outcome
Source: bioRxiv or medRxiv preprint supplement (doi:10.1101/2020.11.09.20228015), 2020-11-12

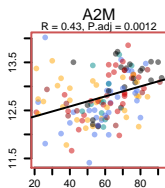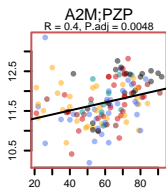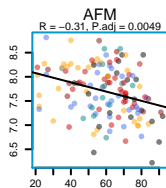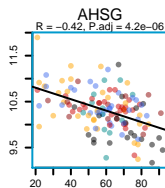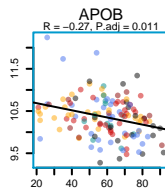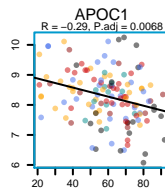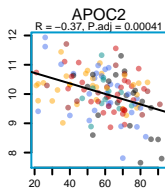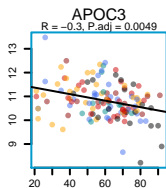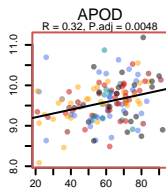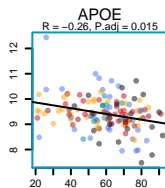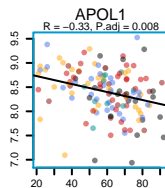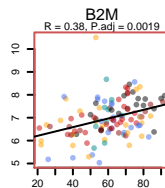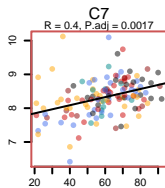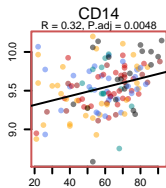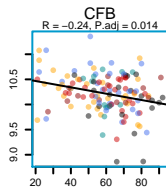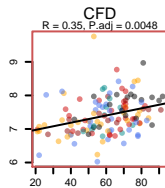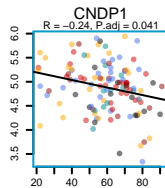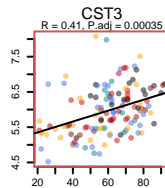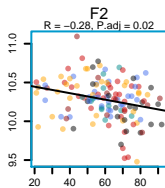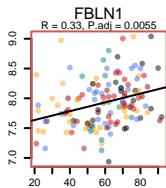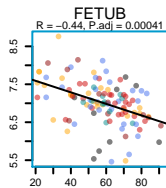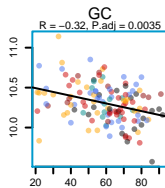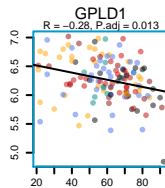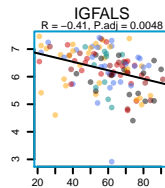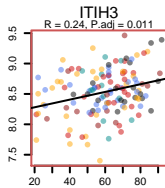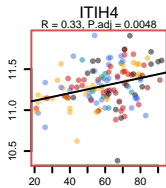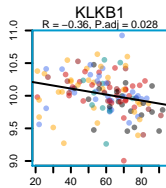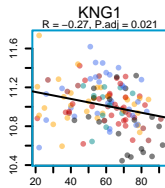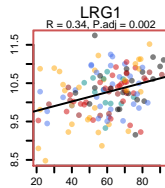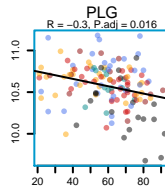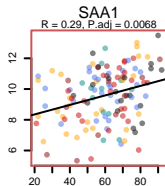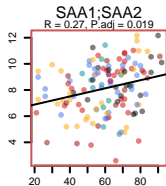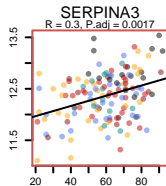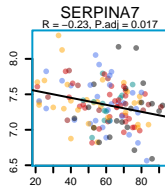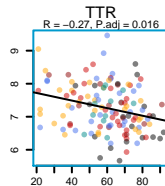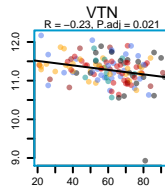

Estimated glomerular  
filtration rate

(CKD-EPI), ml/min  
 $R = -0.37$ ,  $P_{adj} = 0.019$

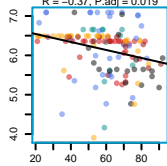

Urea, mg/dl  
 $R = 0.3$ ,  $P_{adj} = 0.0063$

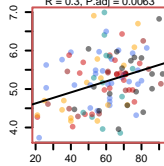

Lymphocytes, % of  
leukocytes

$R = -0.34$ ,  $P_{adj} = 0.001$

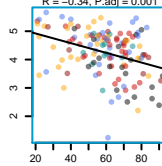

Lymphocytes per nl

$R = -0.3$ ,  $P_{adj} = 0.021$

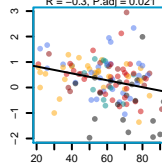

Neutrophils, % of  
leukocytes

$R = 0.37$ ,  $P_{adj} = 0.001$

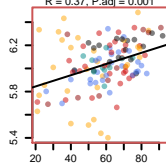

N-terminal pro b-type  
Natriuretic Peptide  
(NT-proBNP), ng/l

$R = 0.5$ ,  $P_{adj} = 9.6e-07$

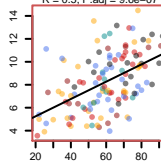

Creatine Kinase MB, % of  
Creatine Kinase

$R = 0.48$ ,  $P_{adj} = 0.0026$

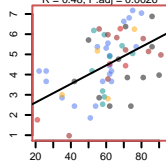

Troponin T HS, ng/l

$R = 0.64$ ,  $P_{adj} = 9.6e-07$

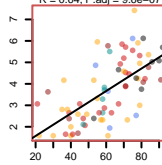

Neutrophil-to-lymphocyte  
ratio

$R = 0.38$ ,  $P_{adj} = 0.00061$

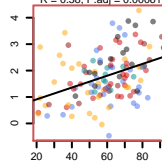

Charlson score

$R = 0.76$ ,  $P_{adj} = 6.2e-21$

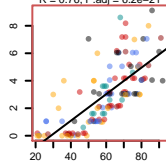

INR

$R = 0.29$ ,  $P_{adj} = 0.027$

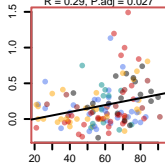

Albumin (clinical), g/l

$R = -0.5$ ,  $P_{adj} = 5.2e-05$

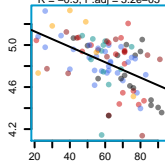

Supplement: Supplementary file [file media-1.zip]
