# Supplementary material for: A time-resolved proteomic and diagnostic map characterizes COVID-19 disease progression and predicts outcome
Source: bioRxiv or medRxiv preprint supplement (doi:10.1101/2020.11.09.20228015), 2020-11-12

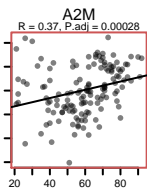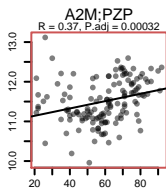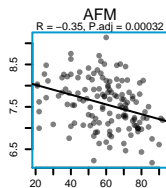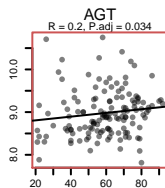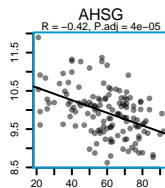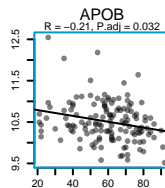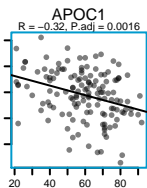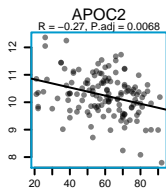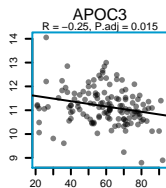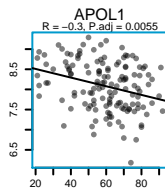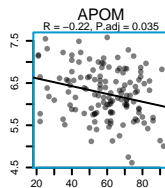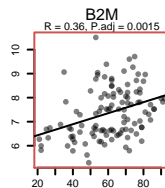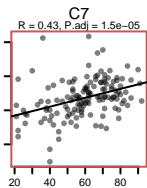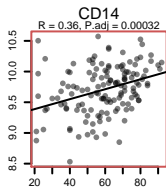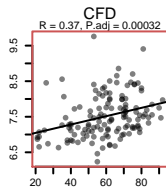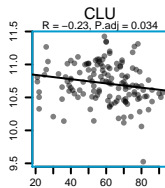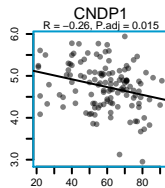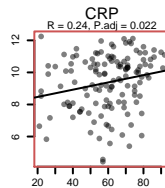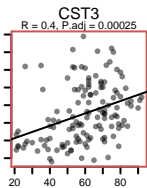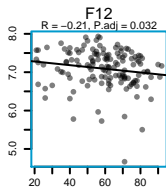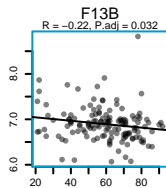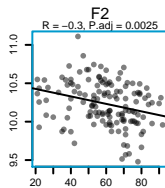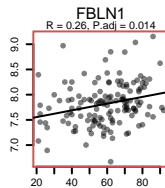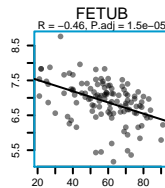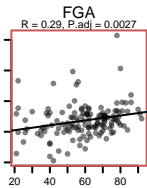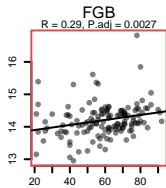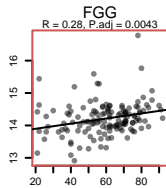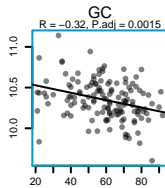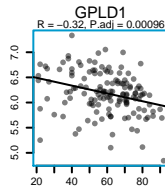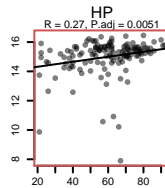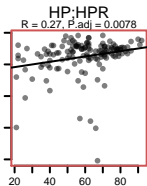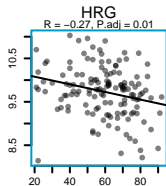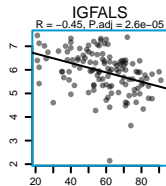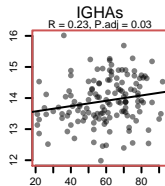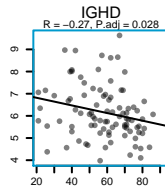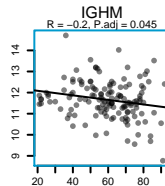

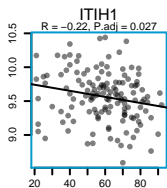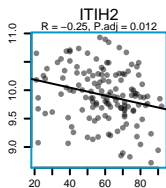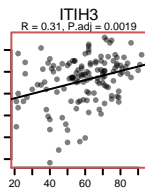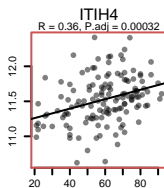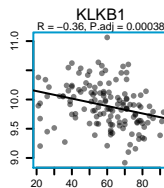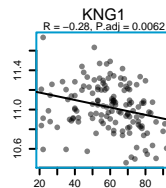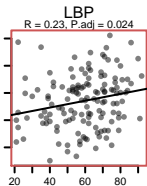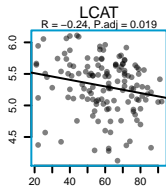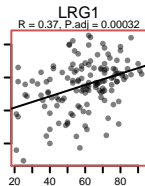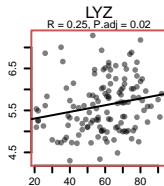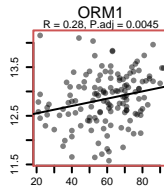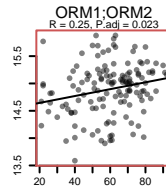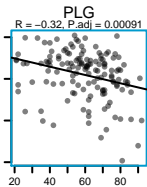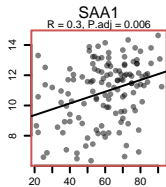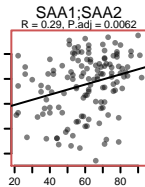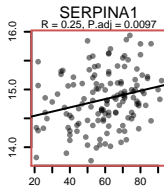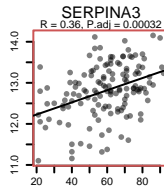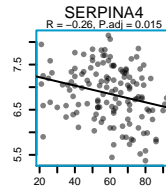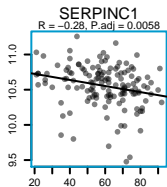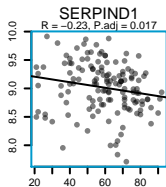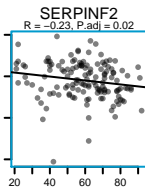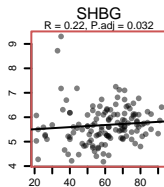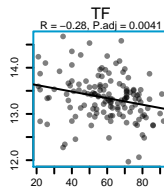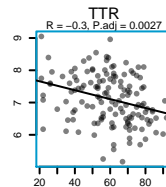

Estimated glomerular  
filtration rate

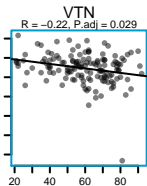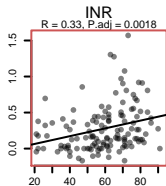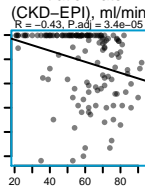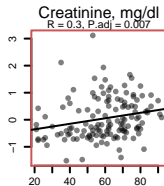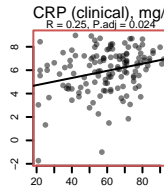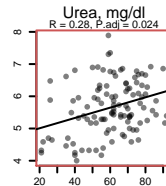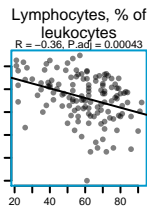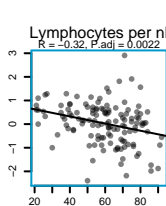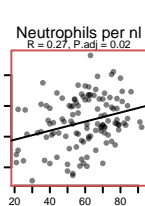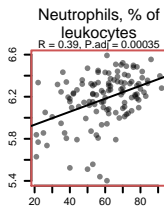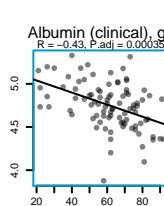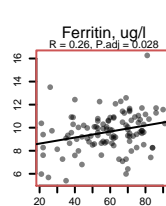

N-terminal pro b-type  
Natriuretic Peptide  
(NT-proBNP), ng/l  
 $R = 0.47, P_{adj} = 8.5e-06$

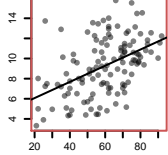

Creatine Kinase MB, % of  
Creatine Kinase  
 $R = 0.42, P_{adj} = 0.011$

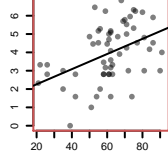

Antithrombin activity %  
 $R = -0.37, P_{adj} = 0.033$

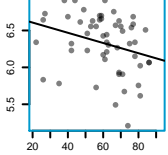

Interleukin-6, ng/l  
 $R = 0.31, P_{adj} = 0.02$

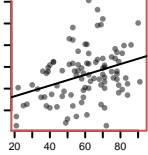

Troponin T HS, ng/l  
 $R = 0.38, P_{adj} = 7.7e-05$

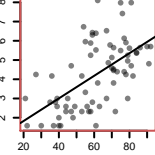

Neutrophil-to-lymphocyte  
ratio  
 $R = 0.39, P_{adj} = 0.00033$

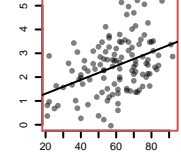

Charlson score  
 $R = 0.79, P_{adj} = 2e-24$

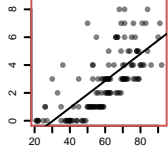

Supplement: Supplementary file [file media-1.zip]
