# Supplementary material for: A time-resolved proteomic and diagnostic map characterizes COVID-19 disease progression and predicts outcome
Source: bioRxiv or medRxiv preprint supplement (doi:10.1101/2020.11.09.20228015), 2020-11-12

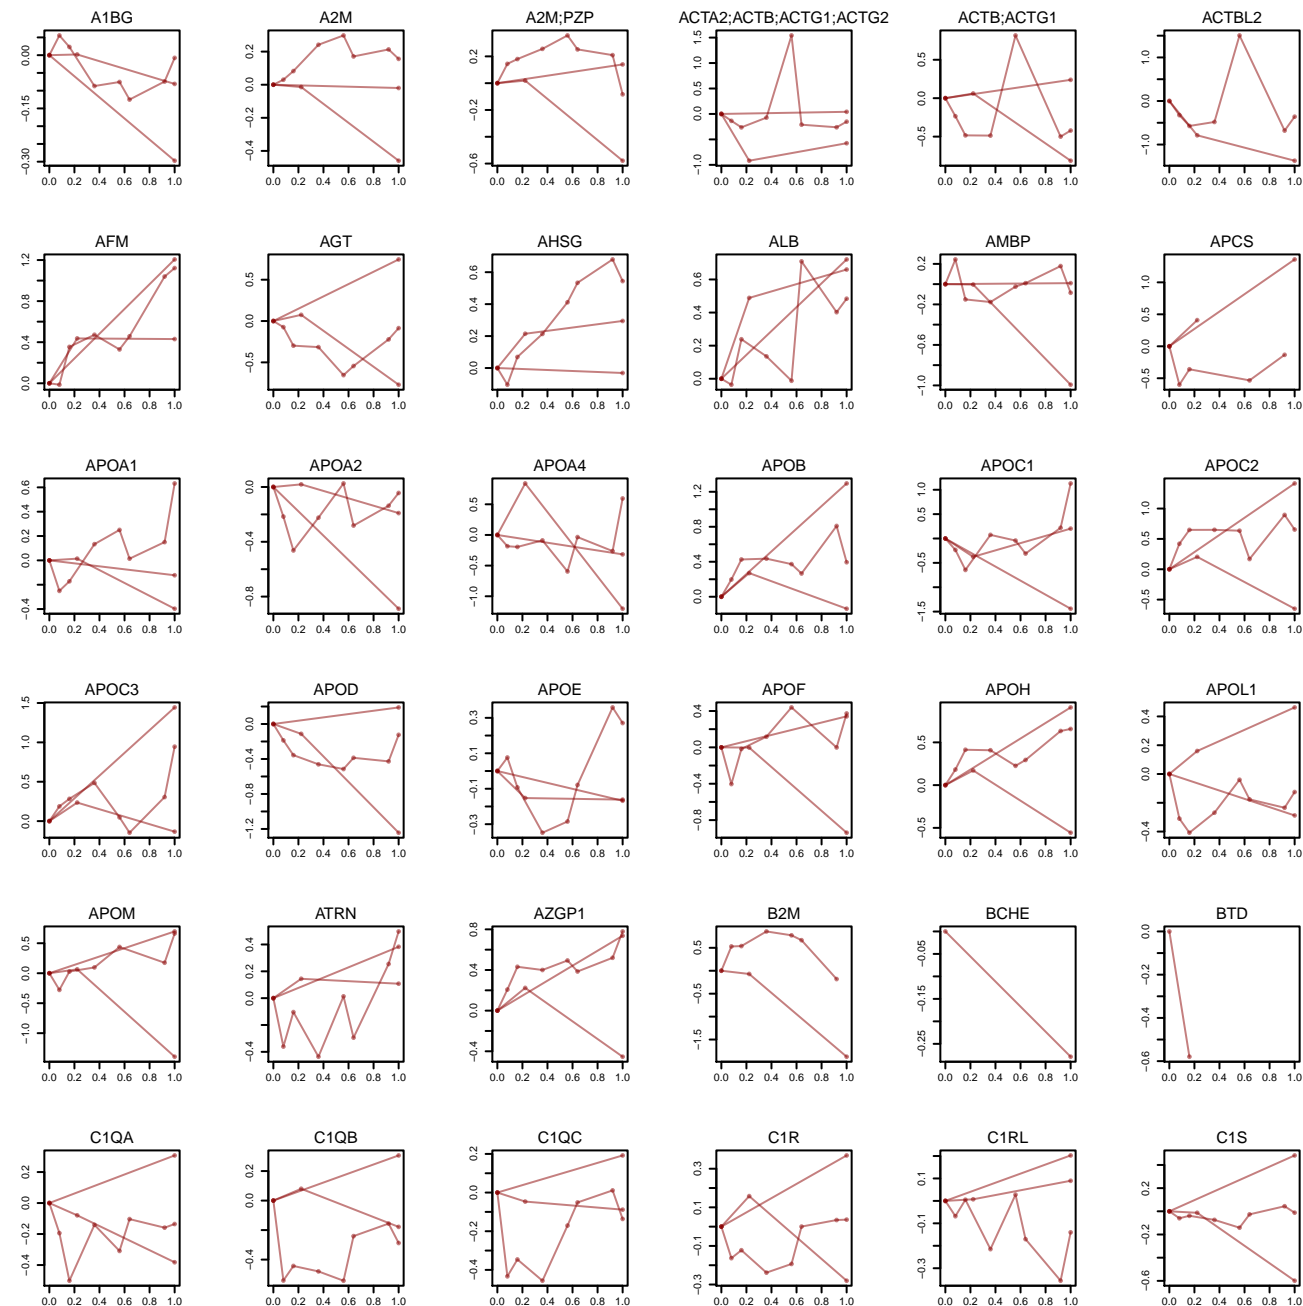

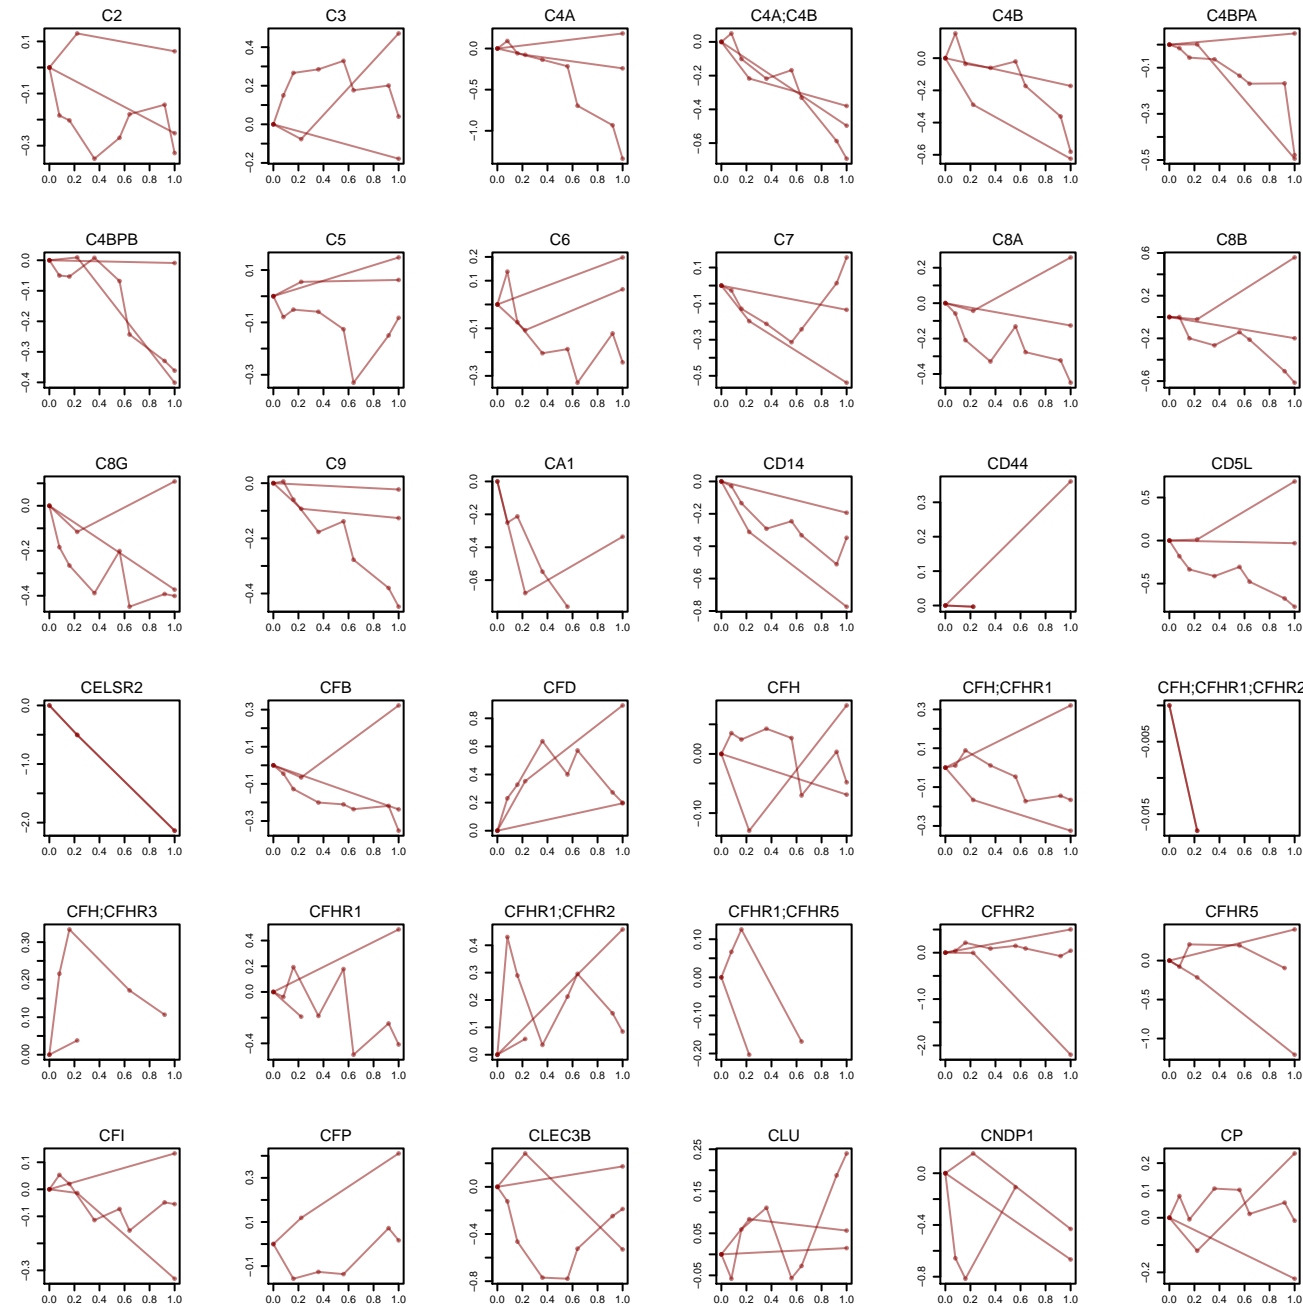

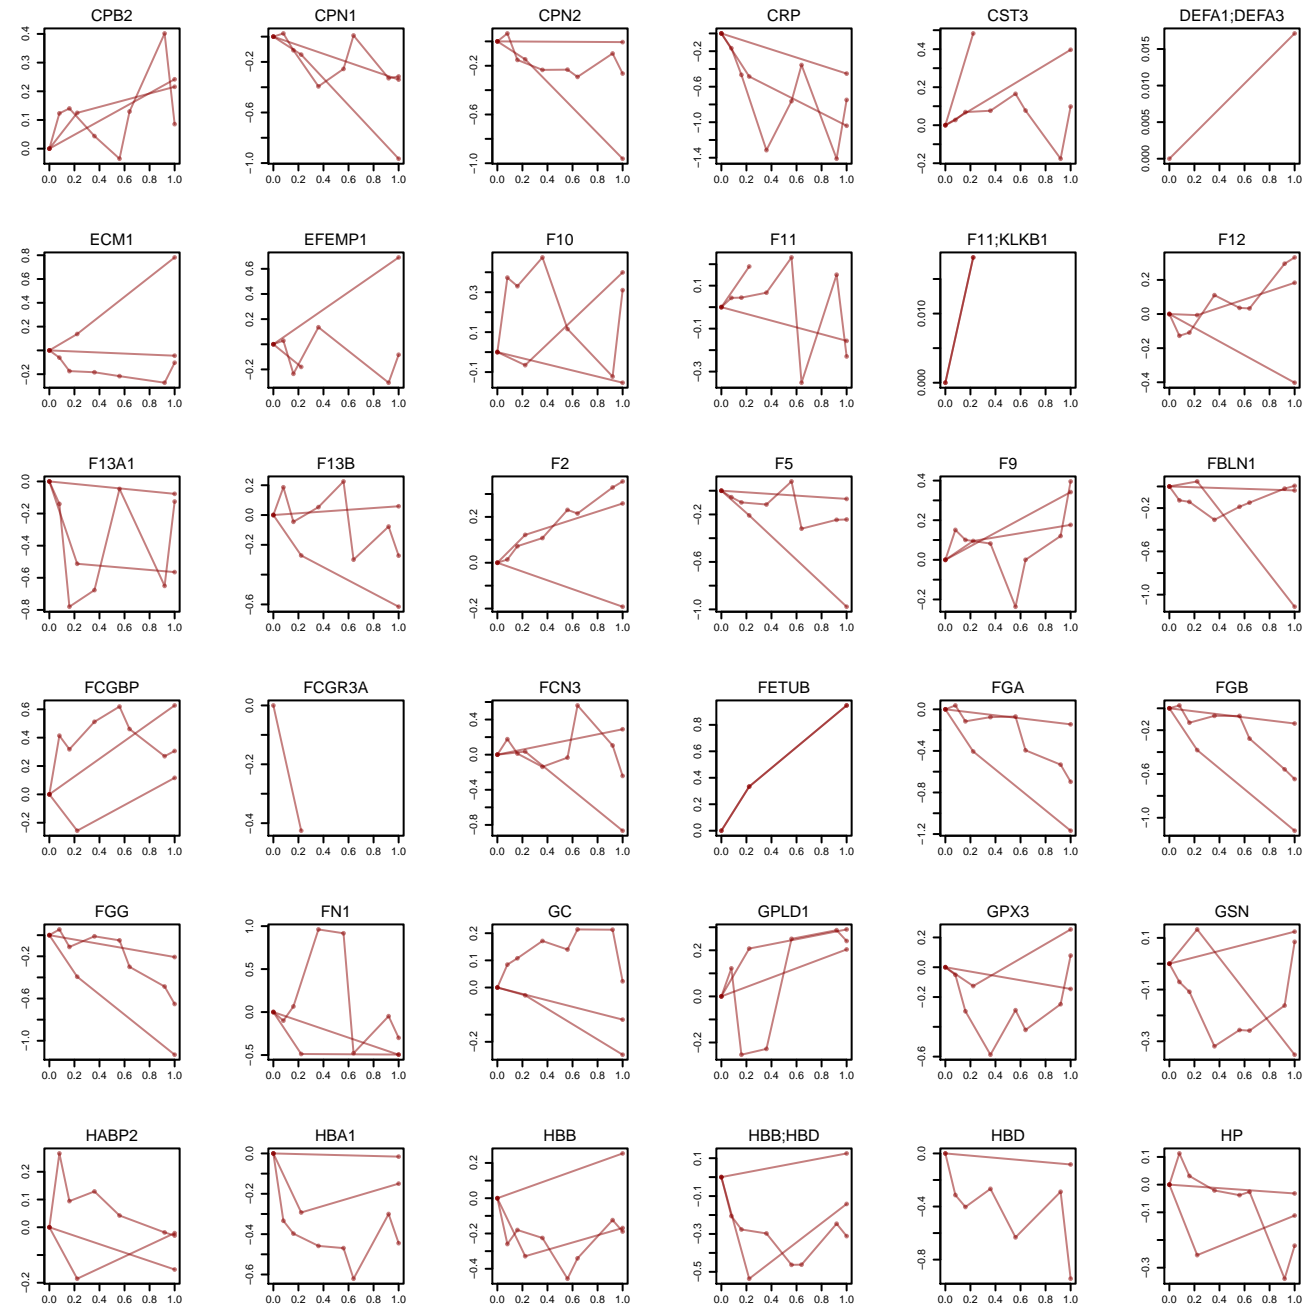

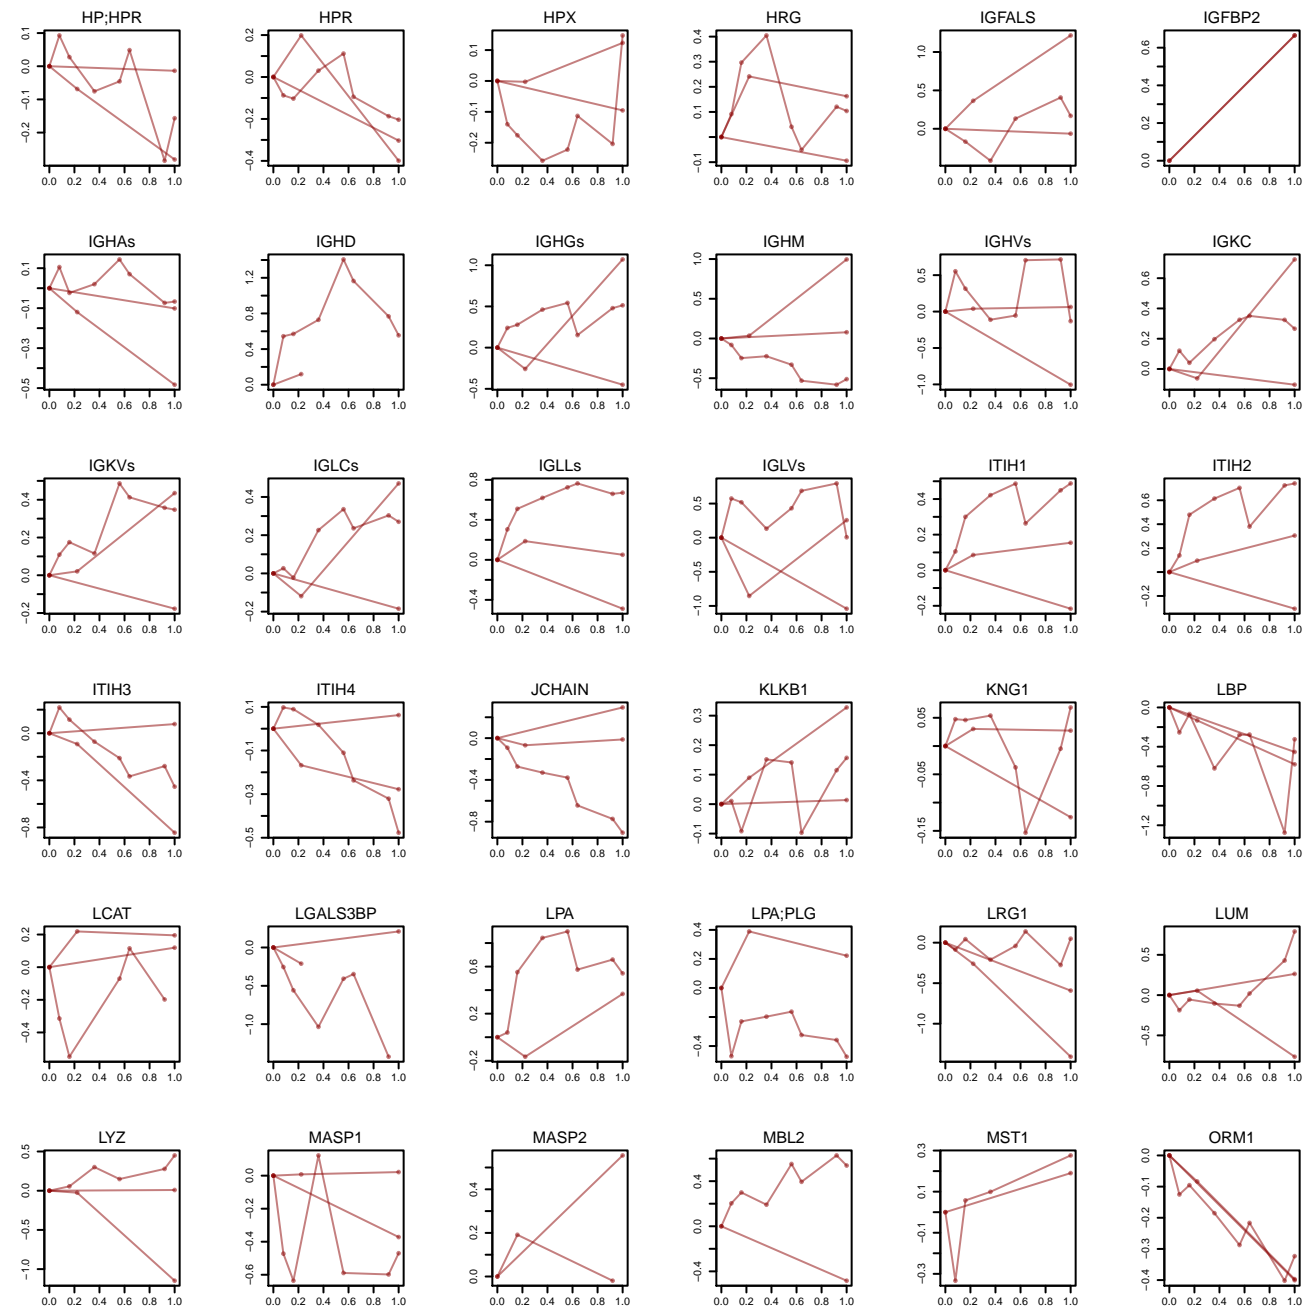

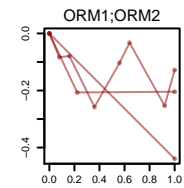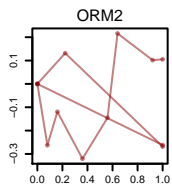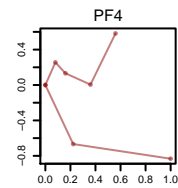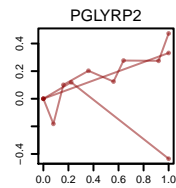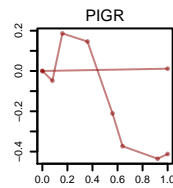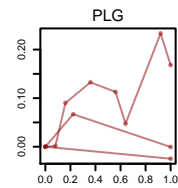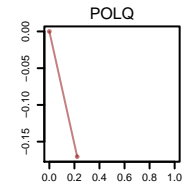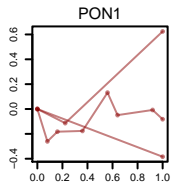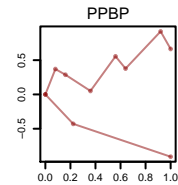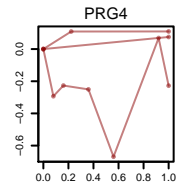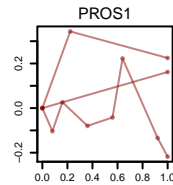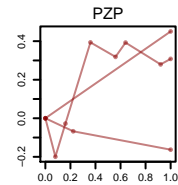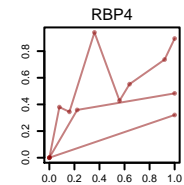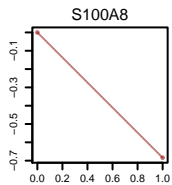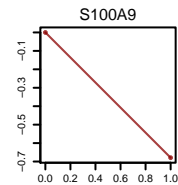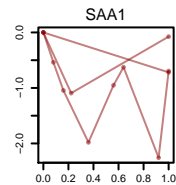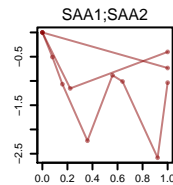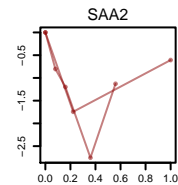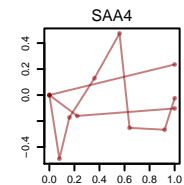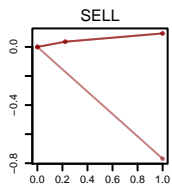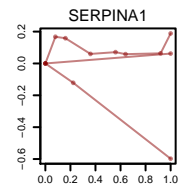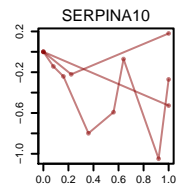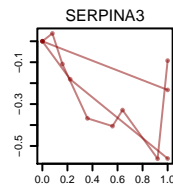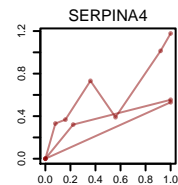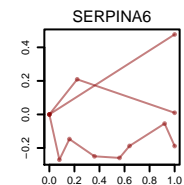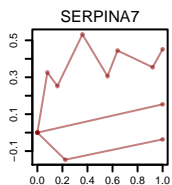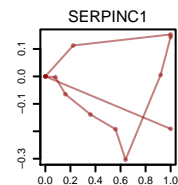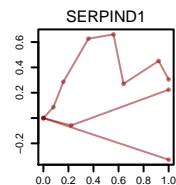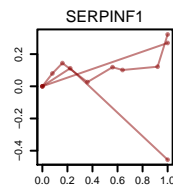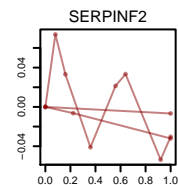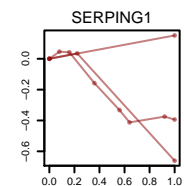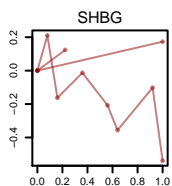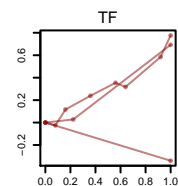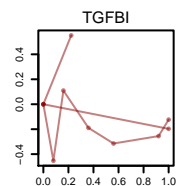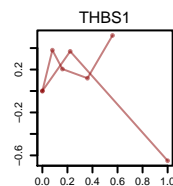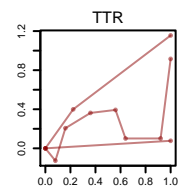

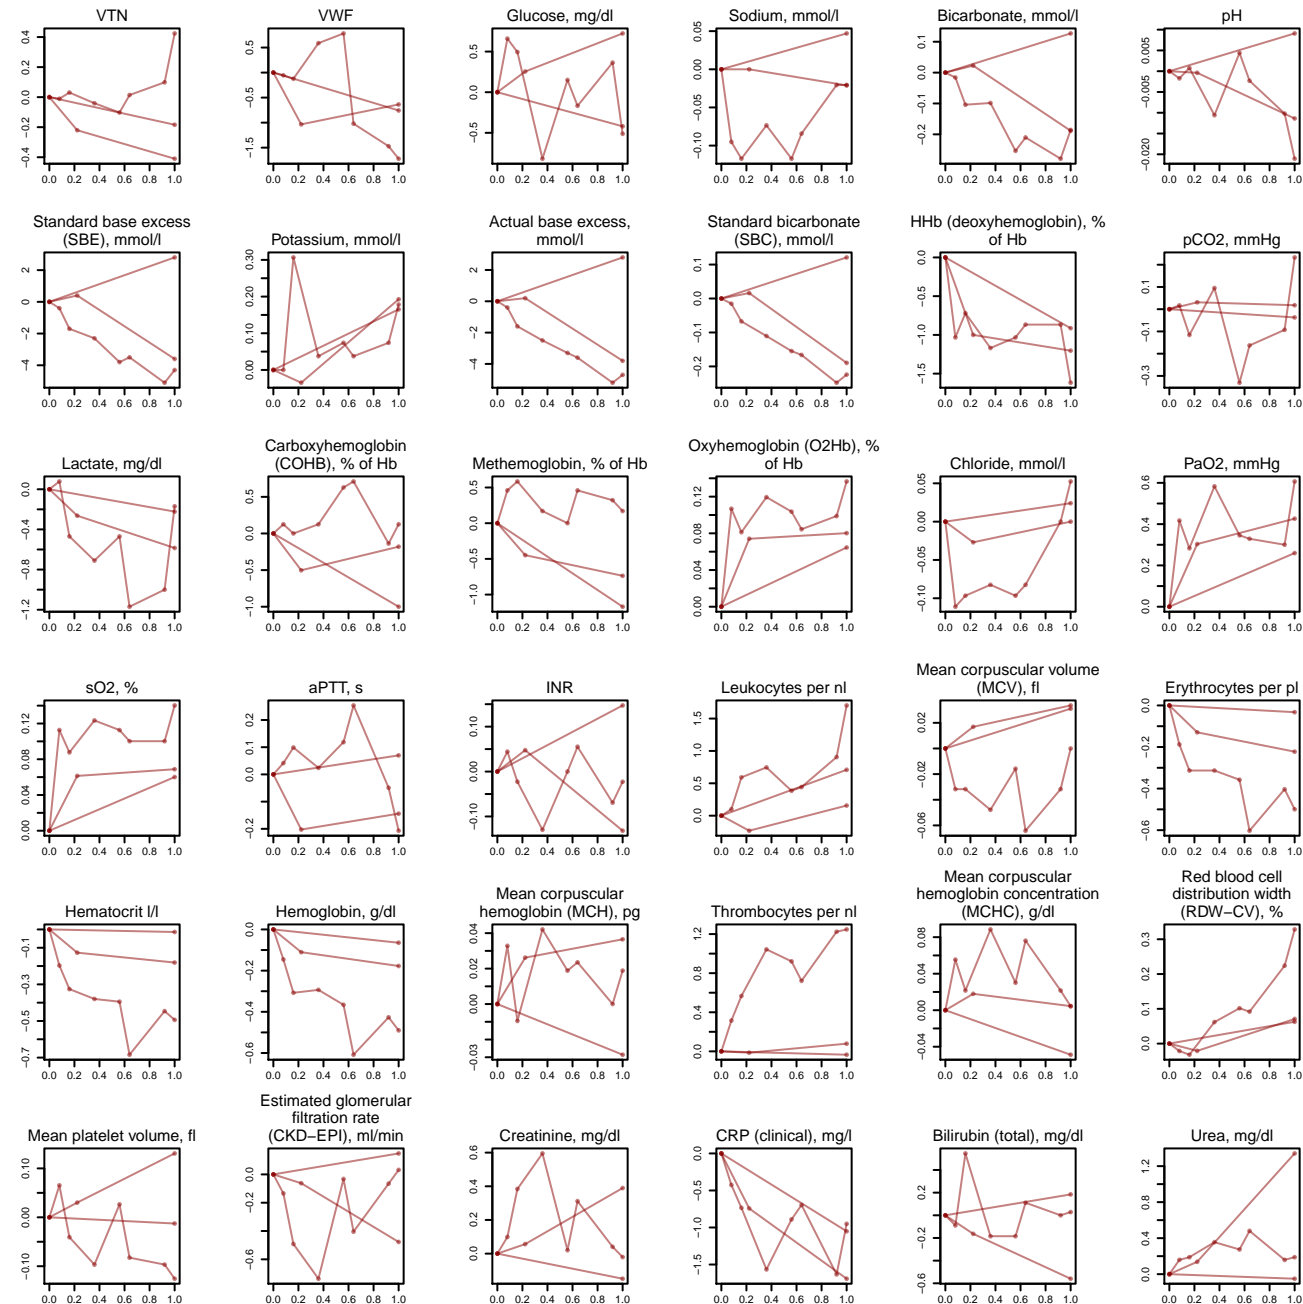

Alanine aminotransferase  
(ALT), U/l

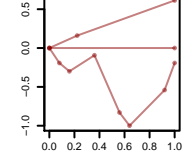

Procalcitonin, µg/l

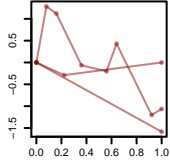

Gamma-glutamyl  
transferase, U/l

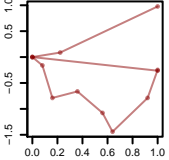

Lymphocytes, % of  
leukocytes

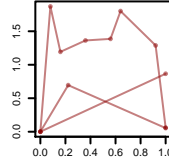

Lymphocytes per nl

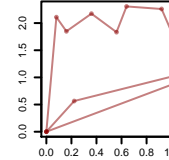

Monocytes, % of  
leukocytes

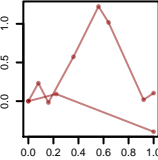

Aspartate  
aminotransferase (AST),  
U/l

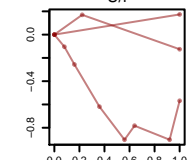

Eosinophiles, % of  
leukocytes

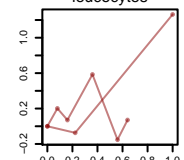

Eosinophiles per nl

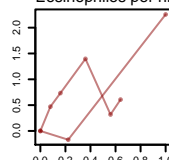

Lactate dehydrogenase  
(LDH), U/l

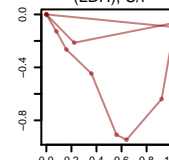

Basophiles, % of  
leukocytes

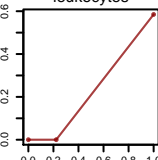

Basophiles per nl

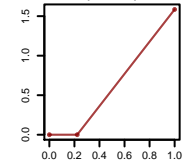

Anorganic phosphate,  
mmol/l

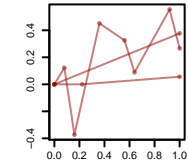

Creatine kinase, U/l

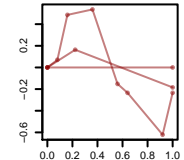

Calcium, mmol/l

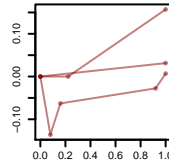

Immature granulocytes  
per nl

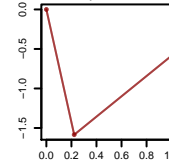

Immature granulocytes, %  
of leukocytes

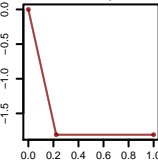

Neutrophils per nl

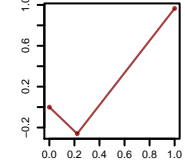

Neutrophils, % of  
leukocytes

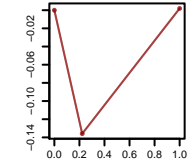

Alkaline phosphatase,  
U/l

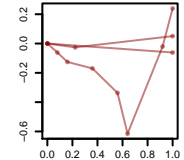

Albumin (clinical), g/l

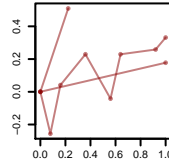

Erythroblasts per nl

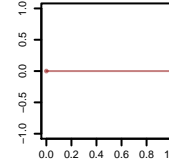

Fibrinogen (clinical),  
g/l

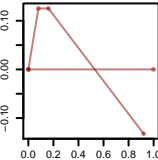

D-Dimer, mg/l

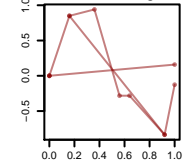

Ferritin, ug/l

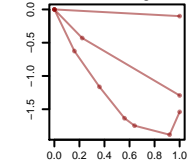

N-terminal pro b-type  
Natriuretic Peptide  
(NT-proBNP), ng/l

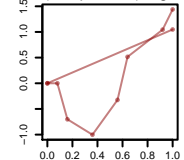

Creatine Kinase MB, U/l

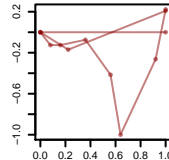

Creatine Kinase MB, % of  
Creatine Kinase

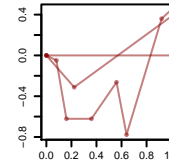

Antithrombin activity %

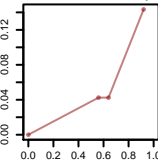

Interleukin-6, ng/l

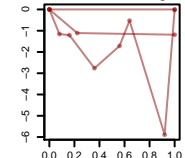

Haptoglobin (clinical),  
g/l

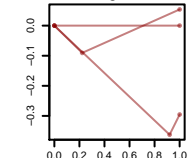

Magnesium, mmol/l

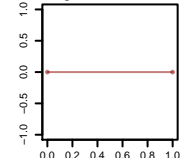

Lipase, U/l

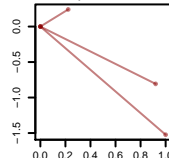

Troponin T HS, ng/l

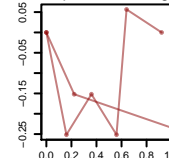

CD169/Siglec-1 antigens  
per monocyte

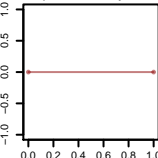

CD169+ monocytes, % of monocytes

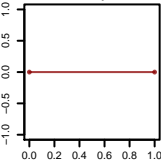

Highly fluorescent lymphocytes per  $\mu$ l

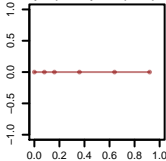

Basal TSH, mU/l

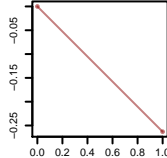

Bilirubin (direct), mg/dl

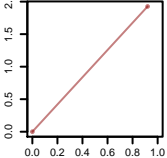

Neutrophil activity

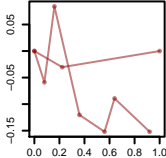

Neutrophil granularity intensity

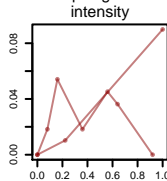

Segment core granulocytes, % of leukocytes

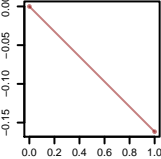

Neutrophil-to-lymphocyte ratio

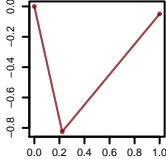

Age

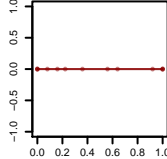

BMI

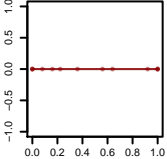

Charlson score

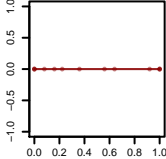

SOFA score

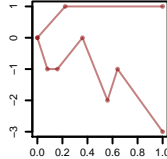

Horowitz index, mmHg

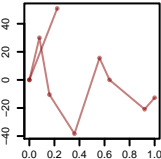

FiO2

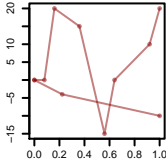

P.Severity

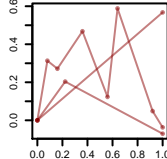

Supplement: Supplementary file [file media-1.zip]
