# Supplementary material for: A time-resolved proteomic and diagnostic map characterizes COVID-19 disease progression and predicts outcome
Source: bioRxiv or medRxiv preprint supplement (doi:10.1101/2020.11.09.20228015), 2020-11-12

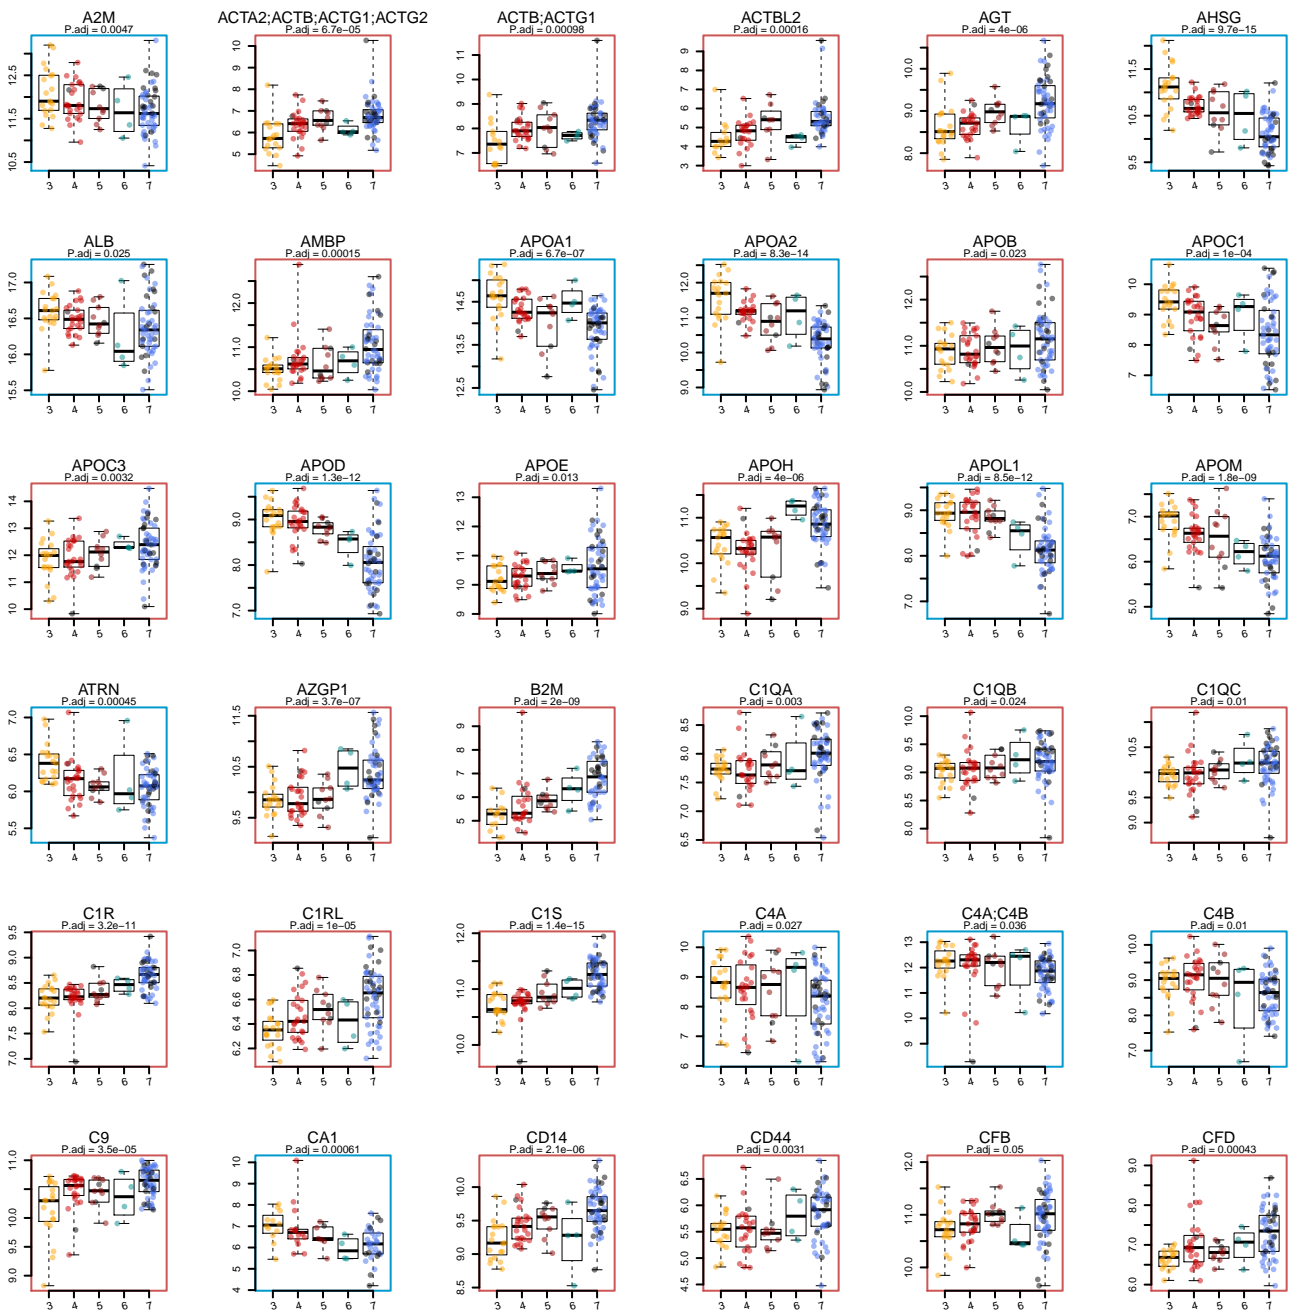

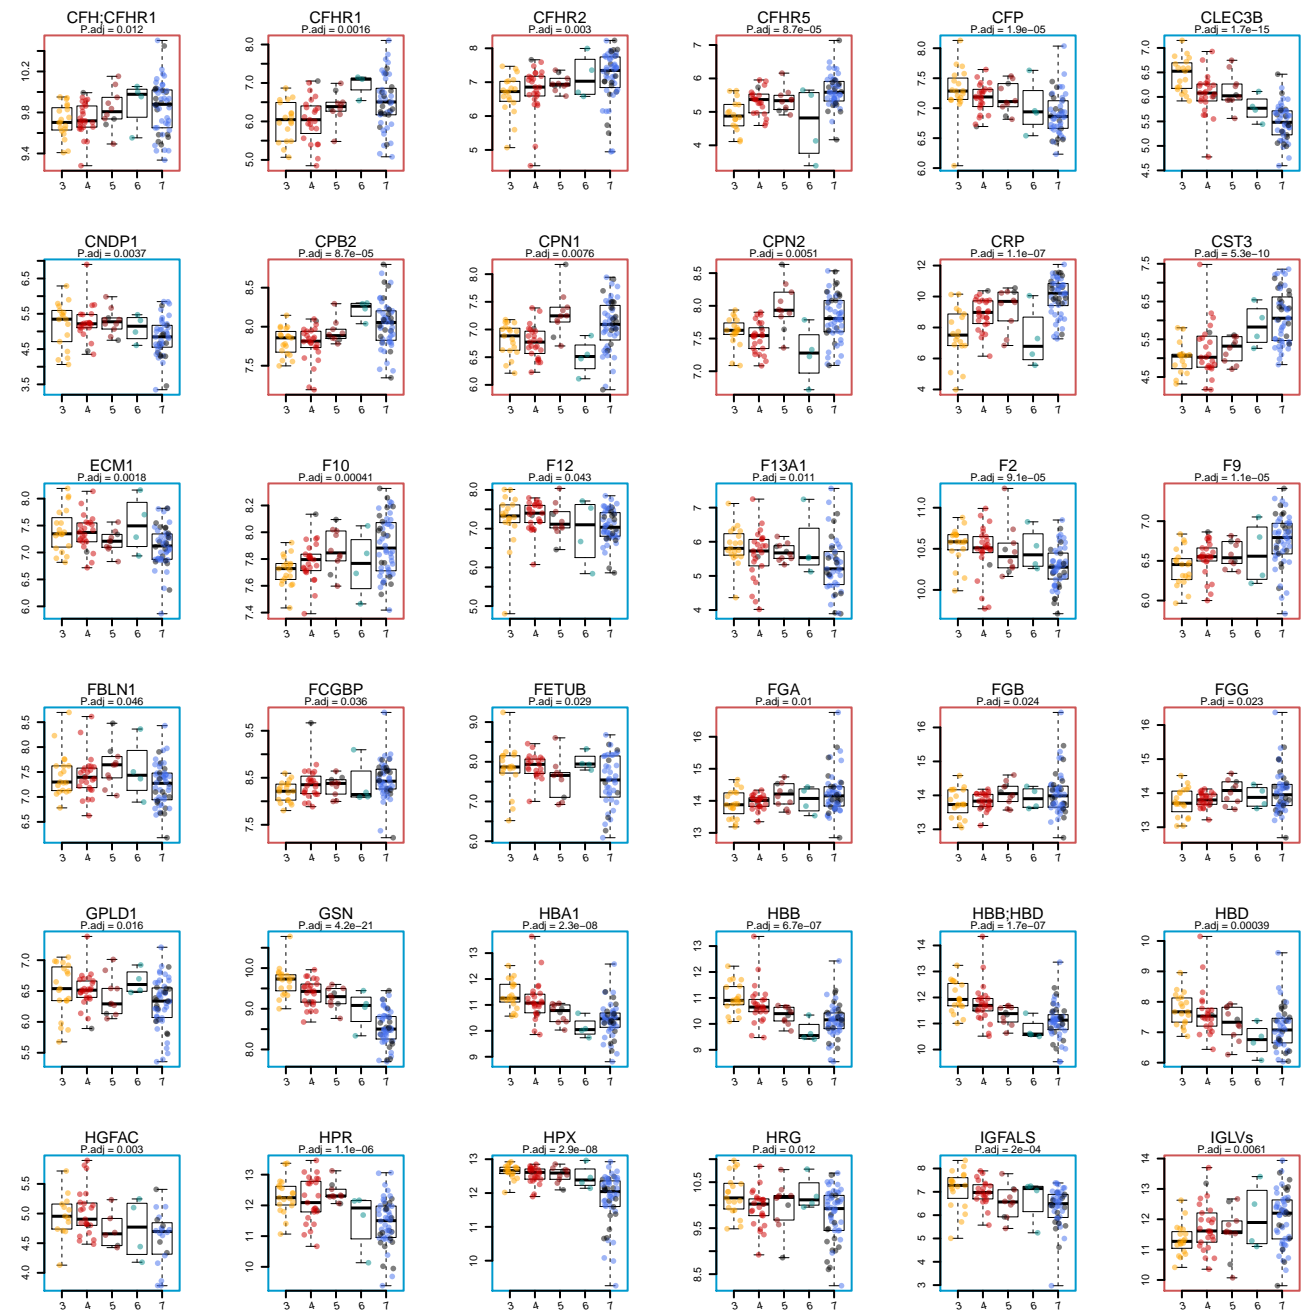

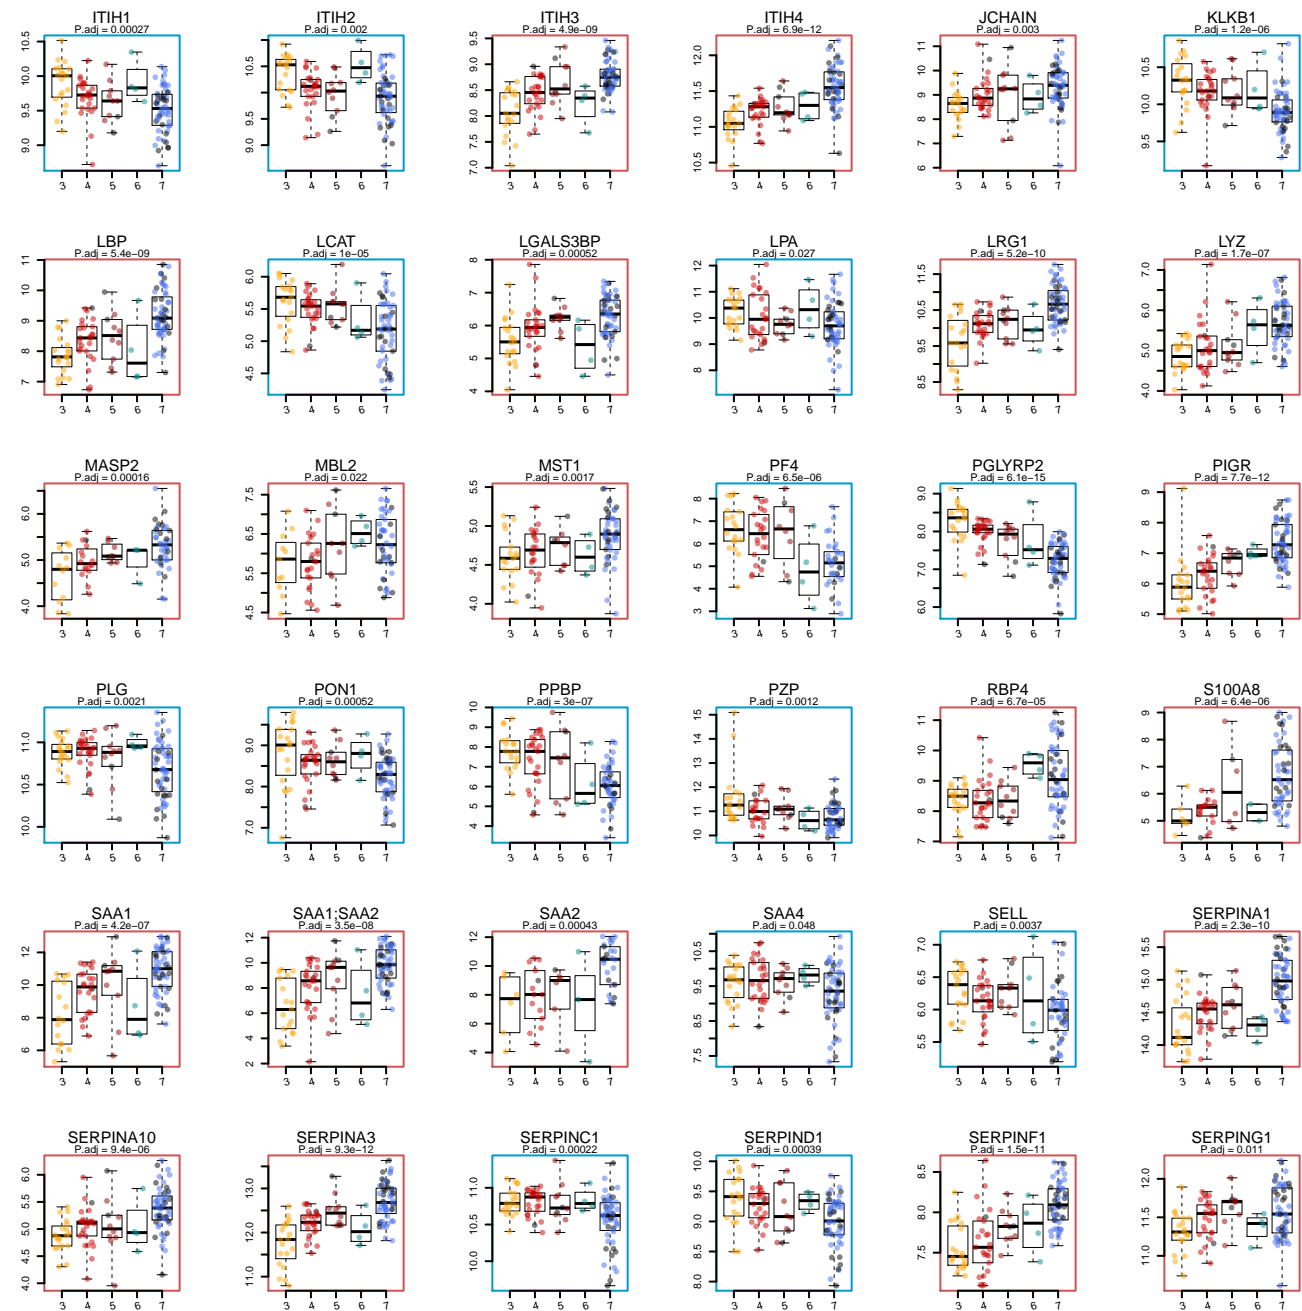

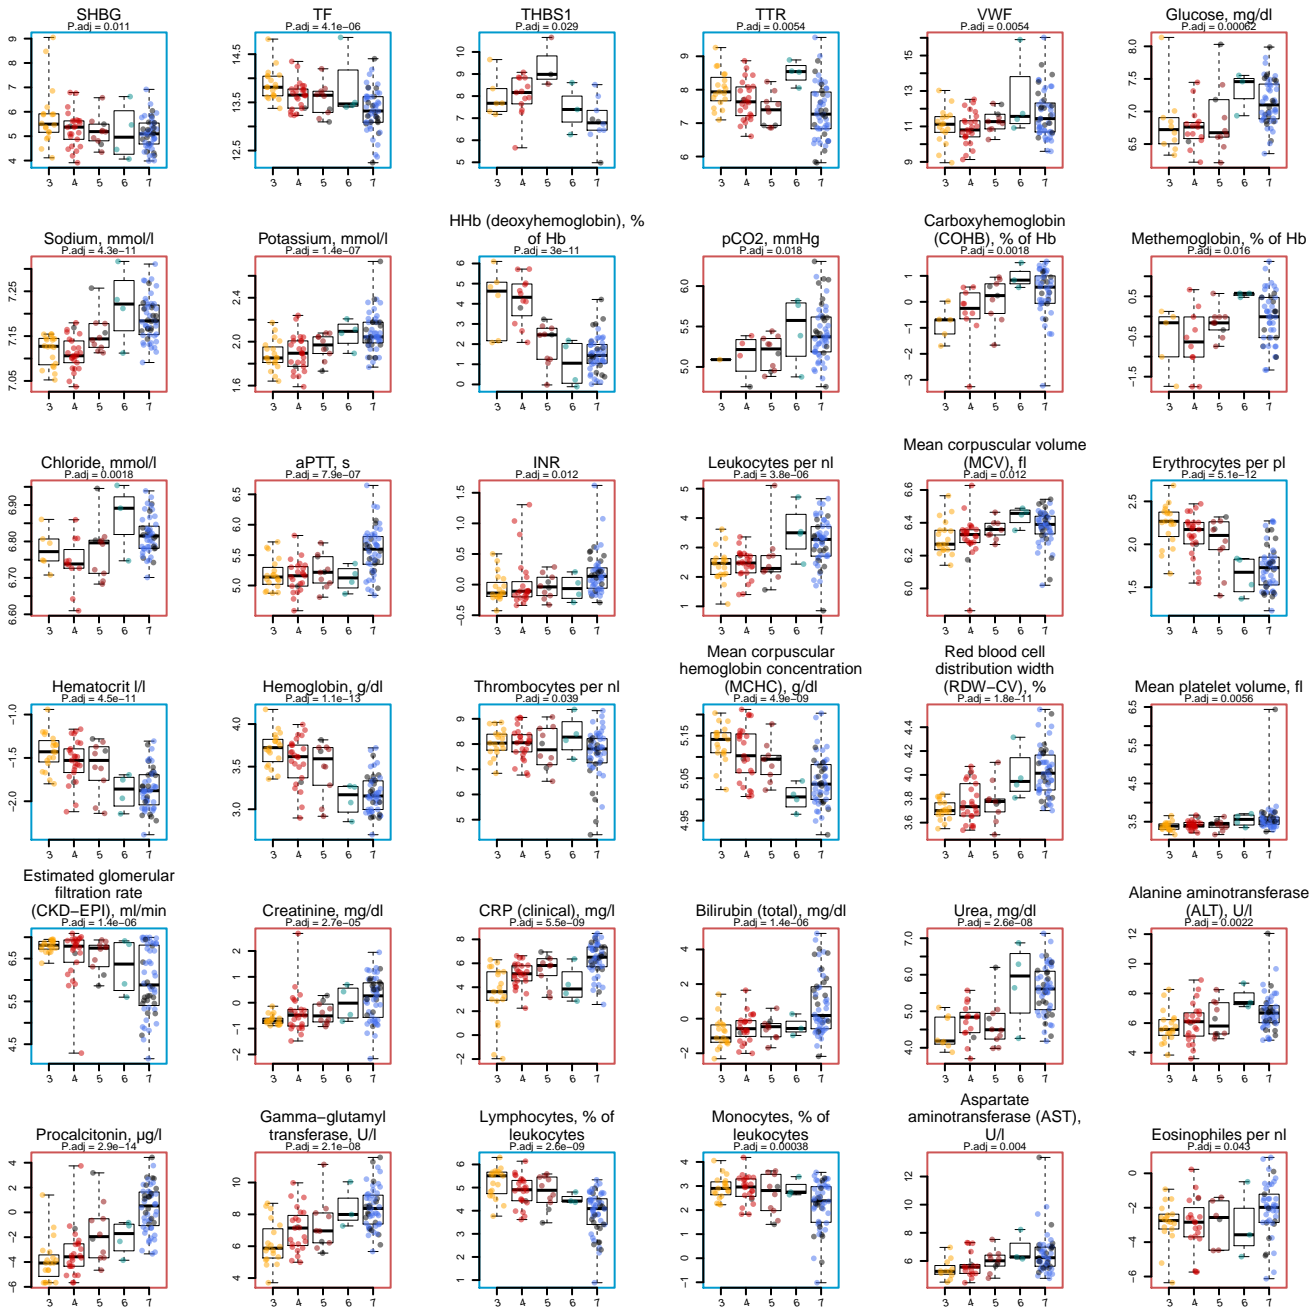

Lactate dehydrogenase  
(LDH), U/l  
 $P_{adj} = 6.6e-05$

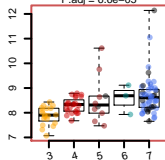

Basophiles, % of  
leukocytes  
 $P_{adj} = 0.039$

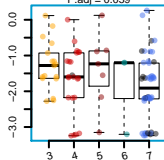

Creatine kinase, U/l  
 $P_{adj} = 0.013$

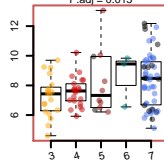

Immature granulocytes  
per nl  
 $P_{adj} = 5.9e-13$

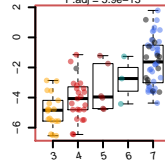

Immature granulocytes, %  
of leukocytes  
 $P_{adj} = 2.9e-12$

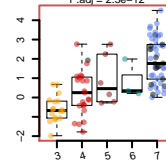

Neutrophils per nl  
 $P_{adj} = 7.2e-07$

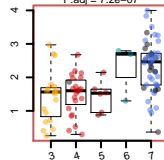

Neutrophils, % of  
leukocytes  
 $P_{adj} = 3.3e-06$

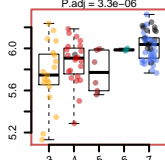

Albumin (clinical), g/l  
 $P_{adj} = 0.056$

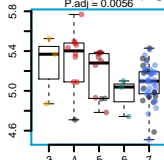

D-Dimer, mg/l  
 $P_{adj} = 9.7e-05$

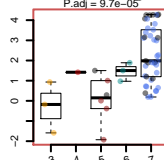

Ferritin, ug/l  
 $P_{adj} = 0.00018$

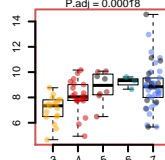

N-terminal pro b-type  
Natriuretic Peptide  
(NT-proBNP), ng/l  
 $P_{adj} = 2.6e-03$

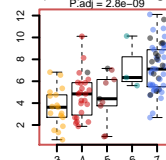

Interleukin-6, ng/l  
 $P_{adj} = 2.3e-07$

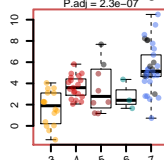

Troponin T HS, ng/l  
 $P_{adj} = 1.7e-03$

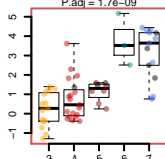

CD169/Siglec-1 antigens  
per monocyte  
 $P_{adj} = 0.0075$

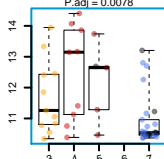

CD169+ monocytes, % of  
monocytes  
 $P_{adj} = 0.0067$

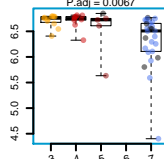

Basal TSH, mU/l  
 $P_{adj} = 0.0089$

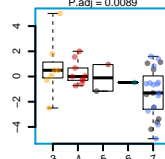

Reticulocytes per nl  
 $P_{adj} = 0.022$

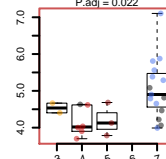

Myoglobin, ug/l  
 $P_{adj} = 0.01$

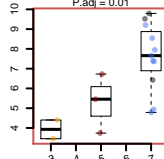

Reticulocytes, % of  
erythrocytes  
 $P_{adj} = 0.0075$

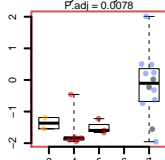

Pseudocholinesterase,  
kU/l  
 $P_{adj} = 0.0018$

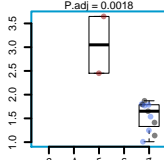

Neutrophil-to-lymphocyte  
ratio  
 $P_{adj} = 1.3e-08$

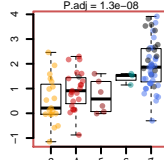

BMI  
 $P_{adj} = 0.012$

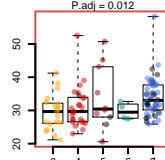

SOFA score  
 $P_{adj} = 6.6e-05$

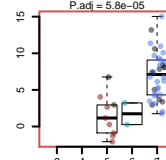

FiO2  
 $P_{adj} = 2e-05$

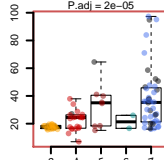

Supplement: Supplementary file [file media-1.zip]
