# Supplementary material for: A time-resolved proteomic and diagnostic map characterizes COVID-19 disease progression and predicts outcome
Source: bioRxiv or medRxiv preprint supplement (doi:10.1101/2020.11.09.20228015), 2020-11-12

ACTA1:ACT2:ACTB:ACTC1

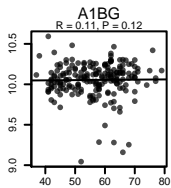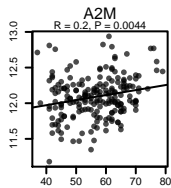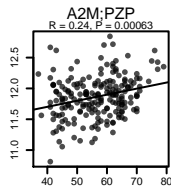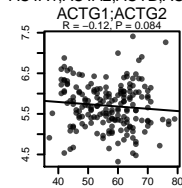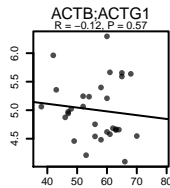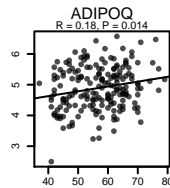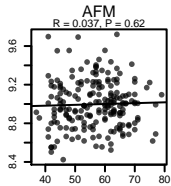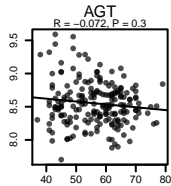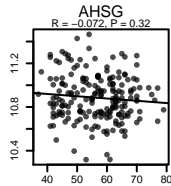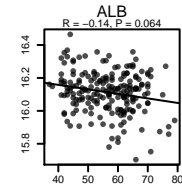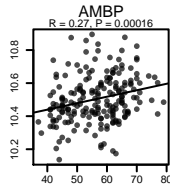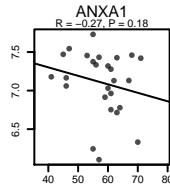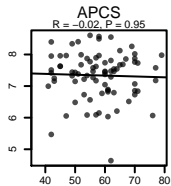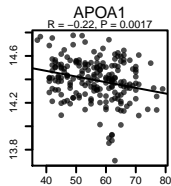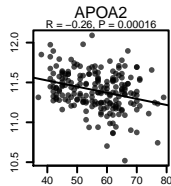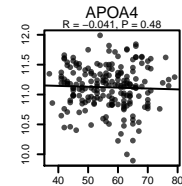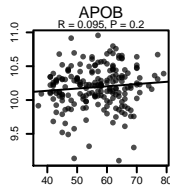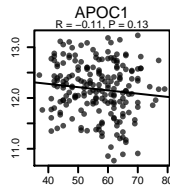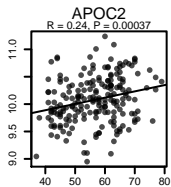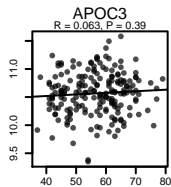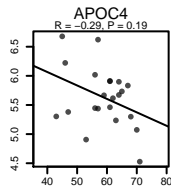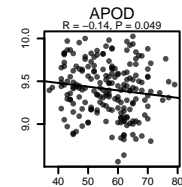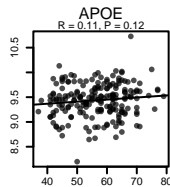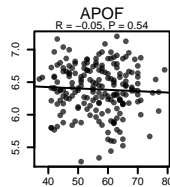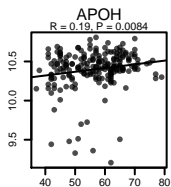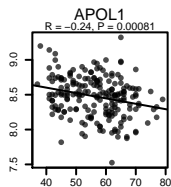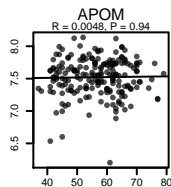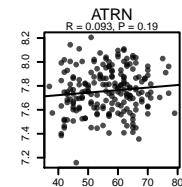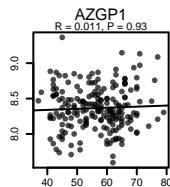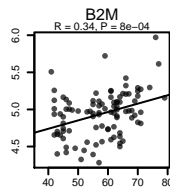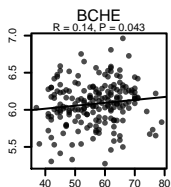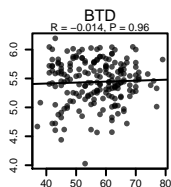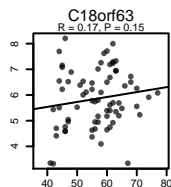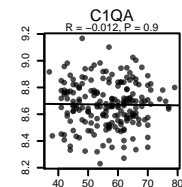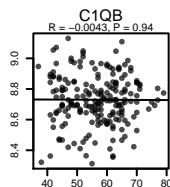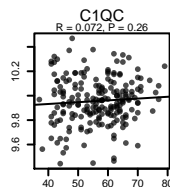

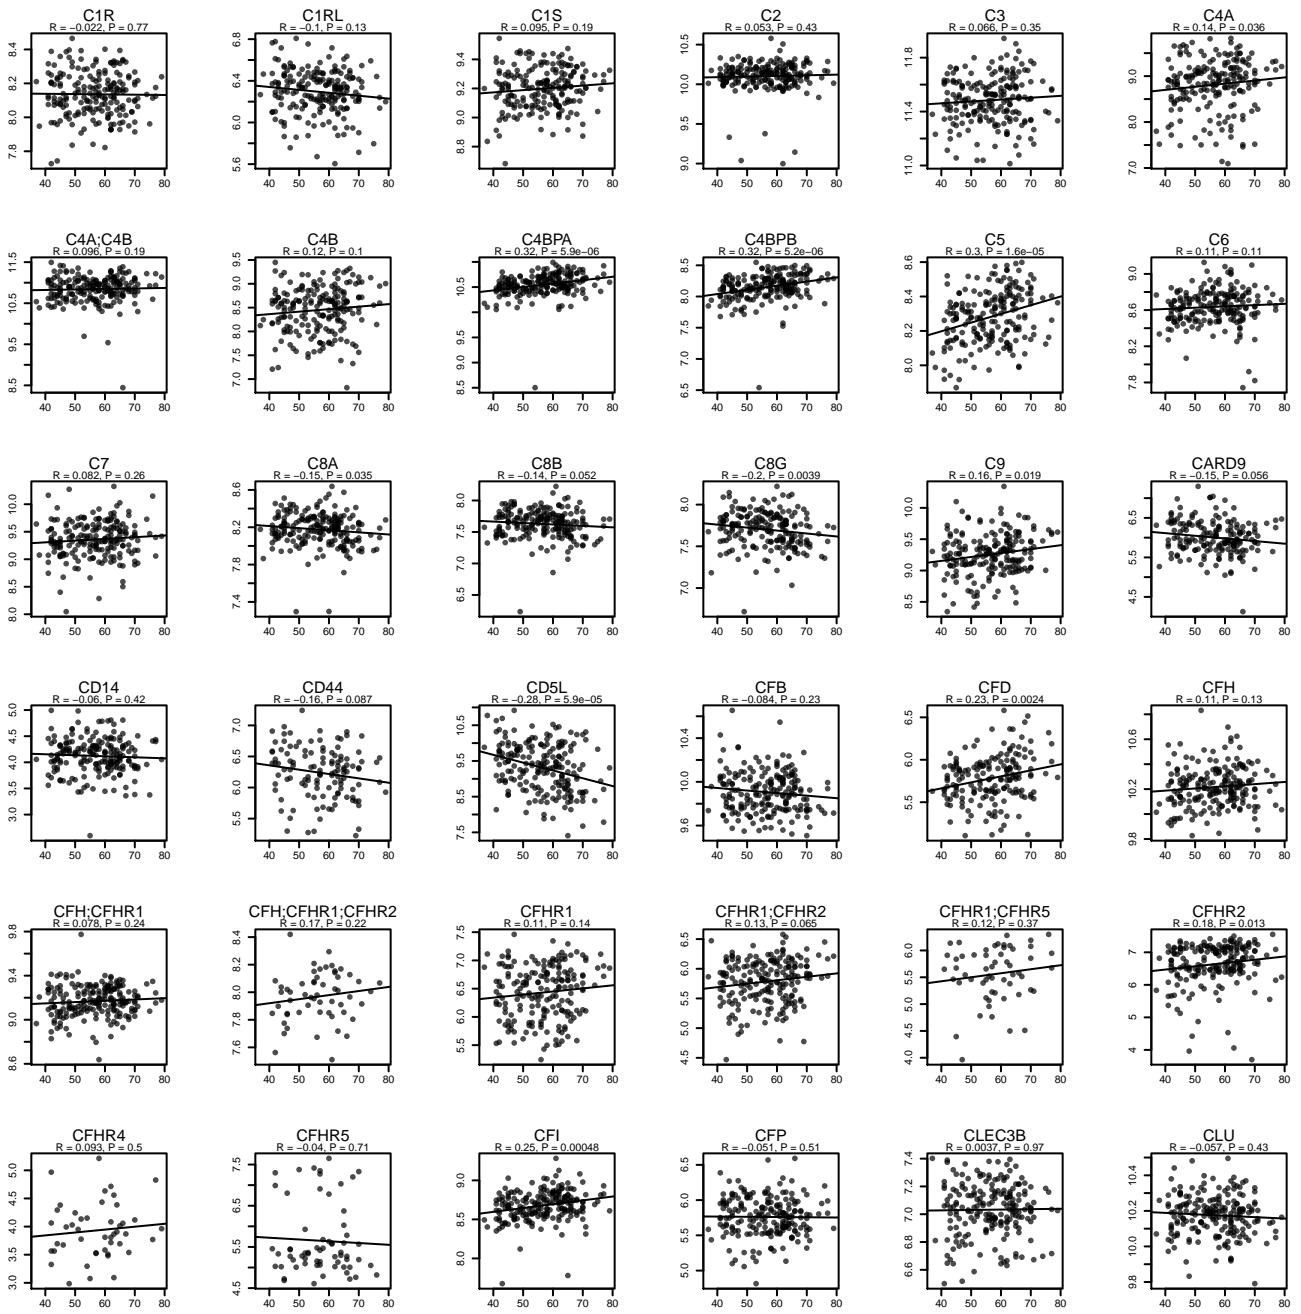

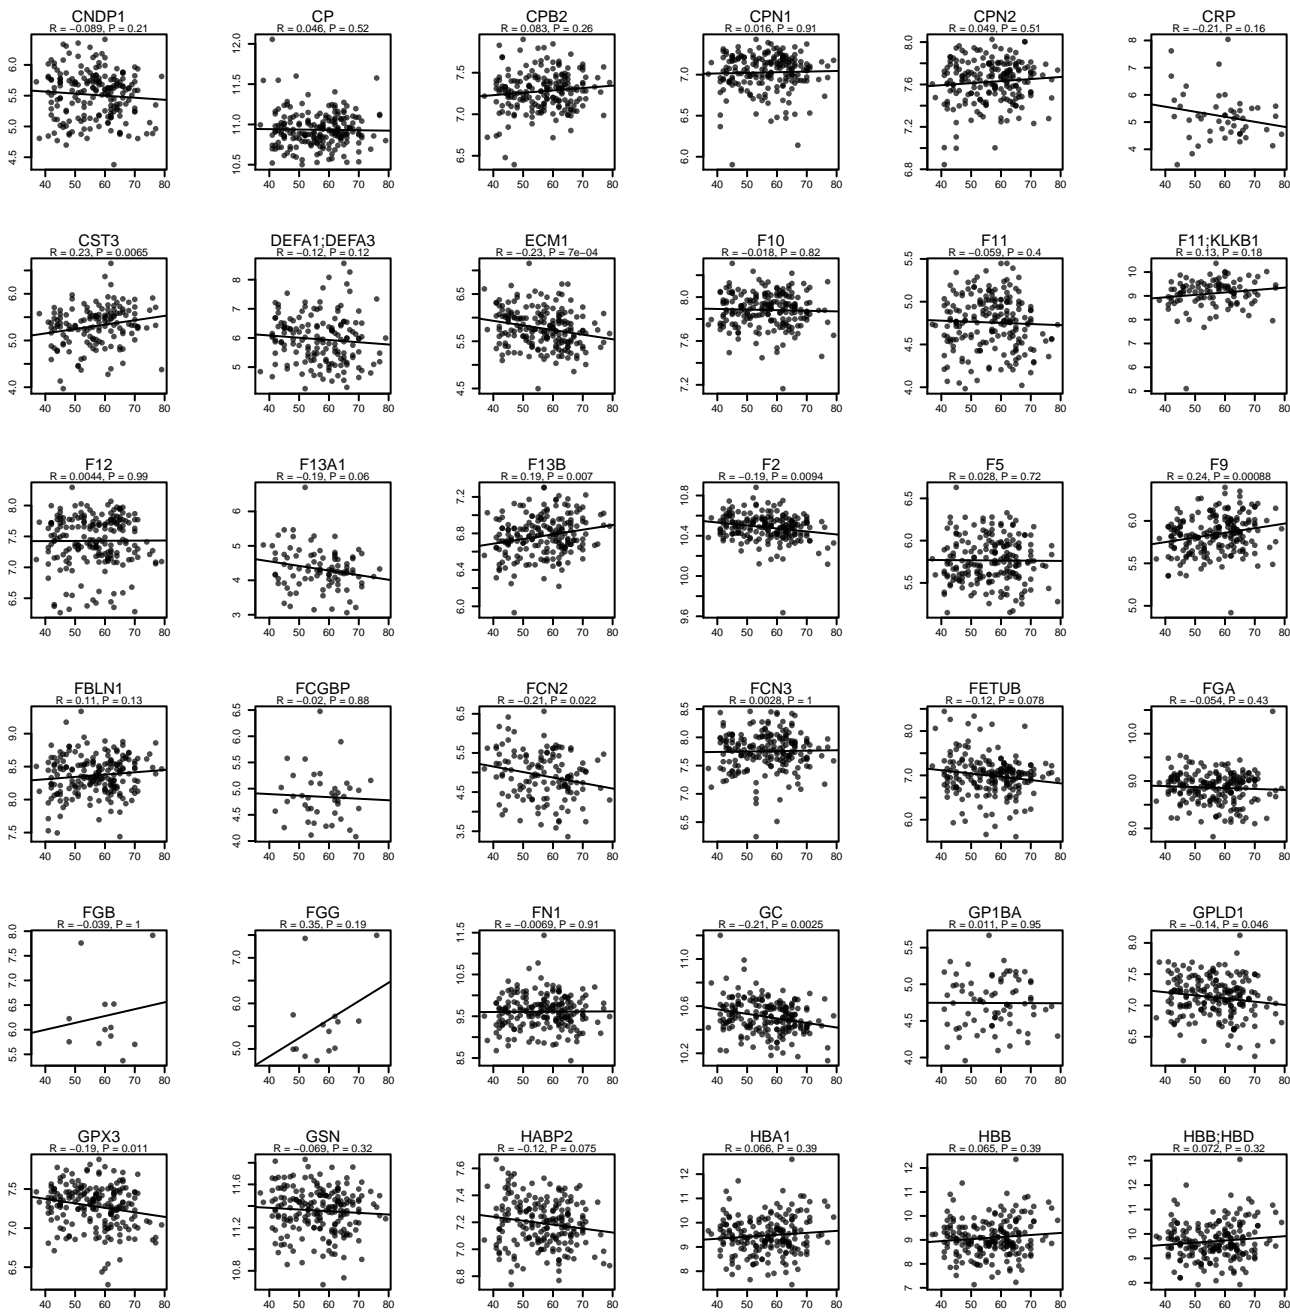

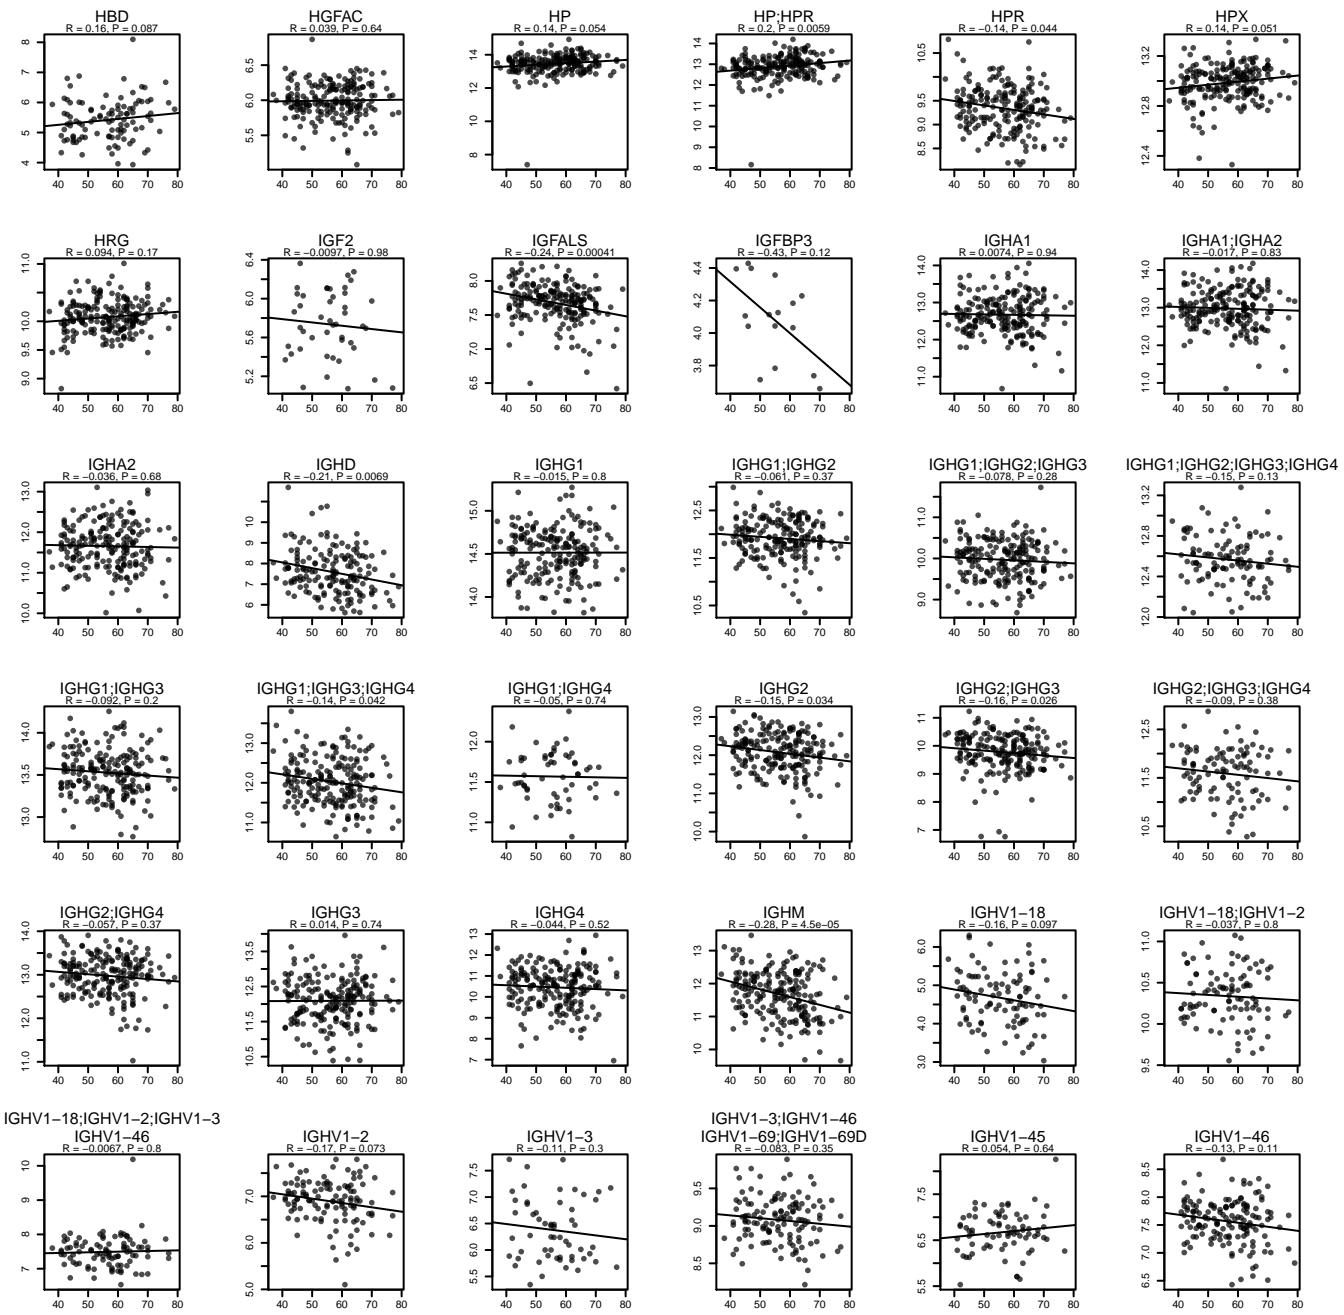

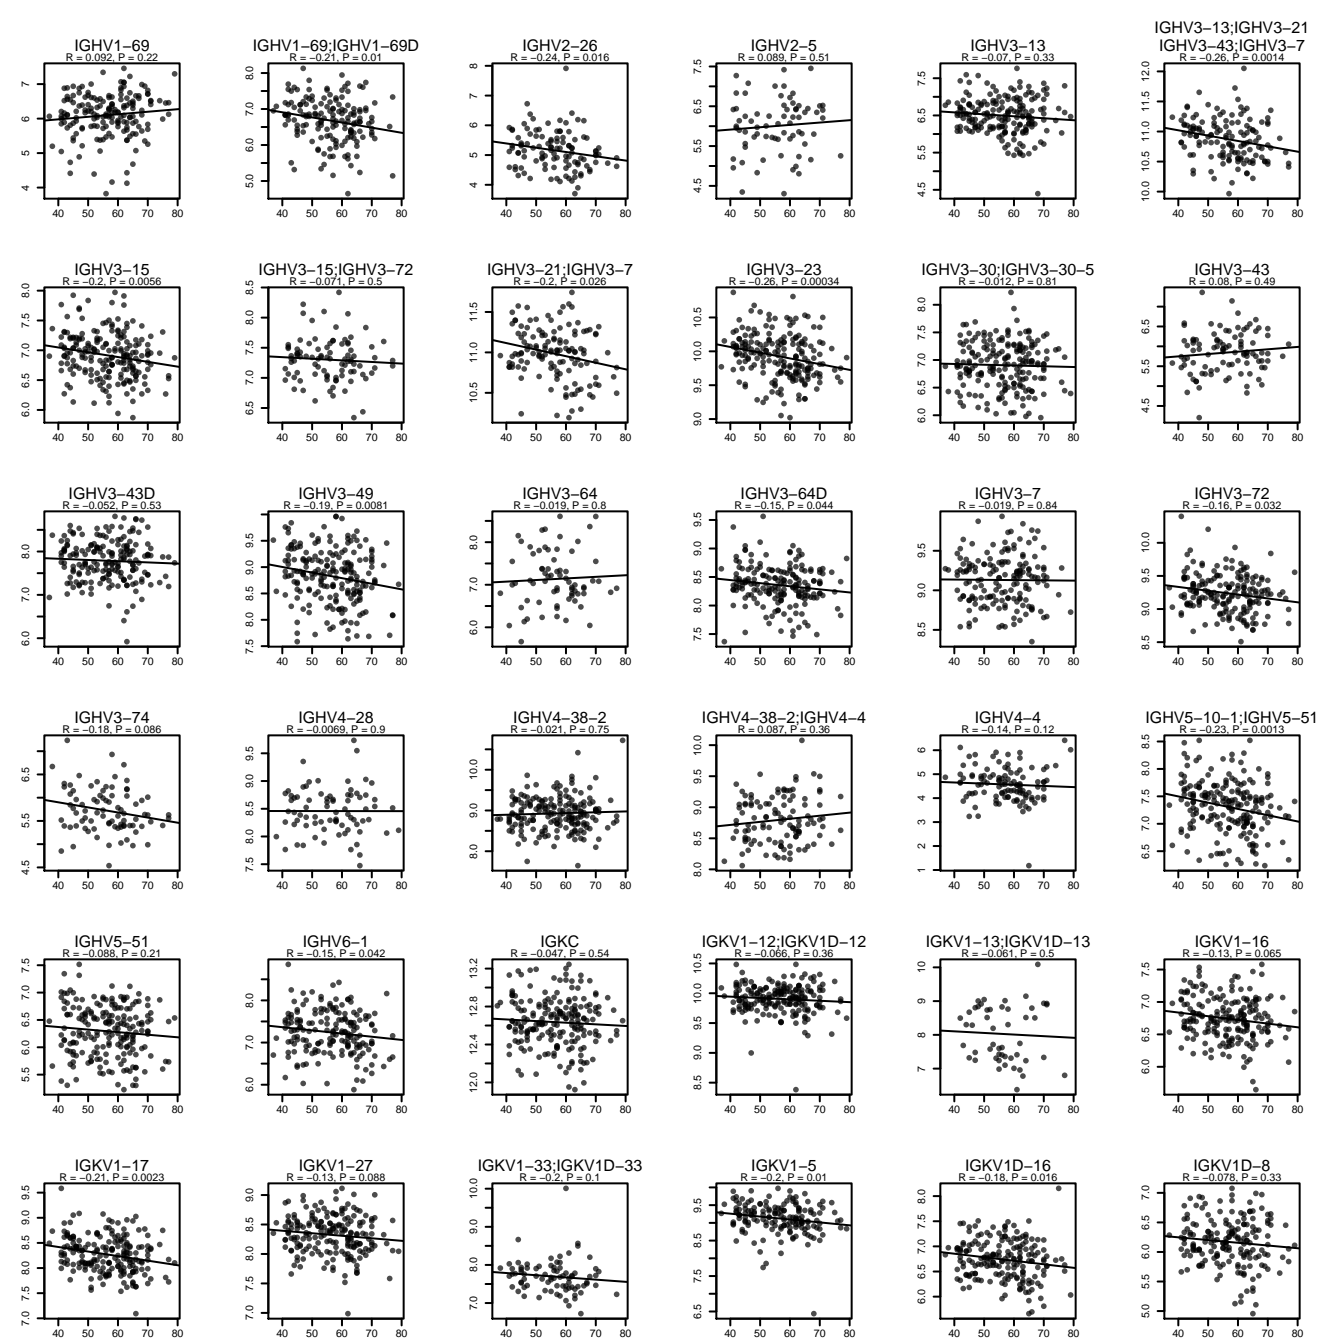

IGKV2-30;IGKV2-40  
IGKV2D-28;IGKV2D-29

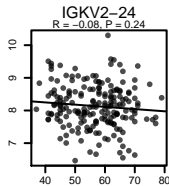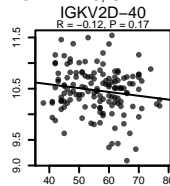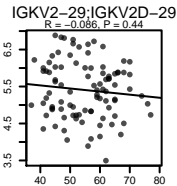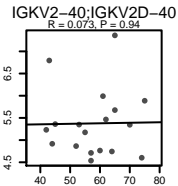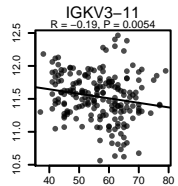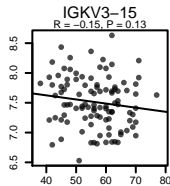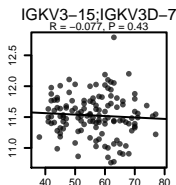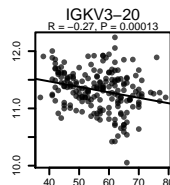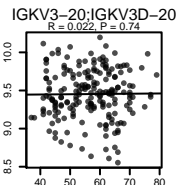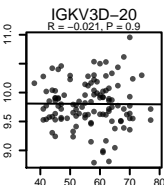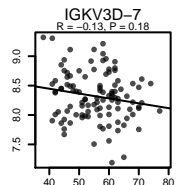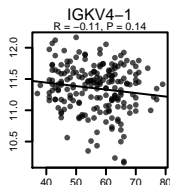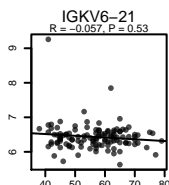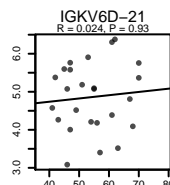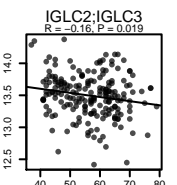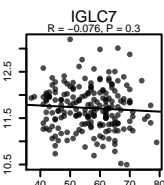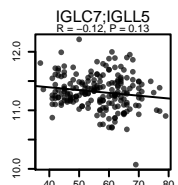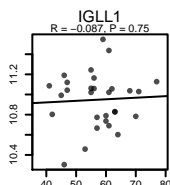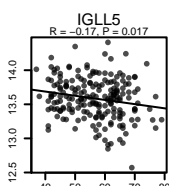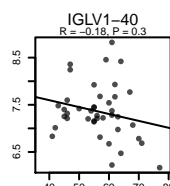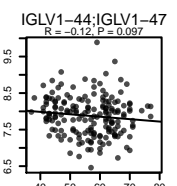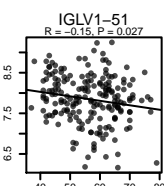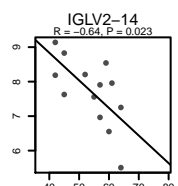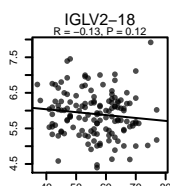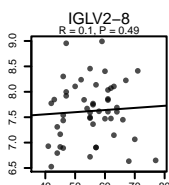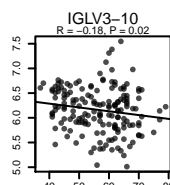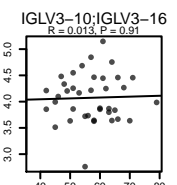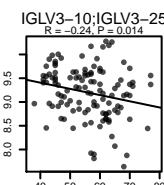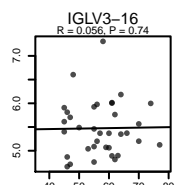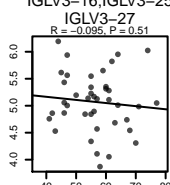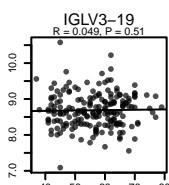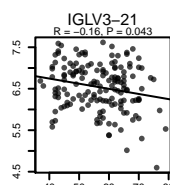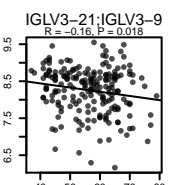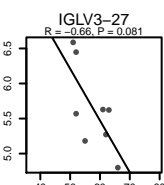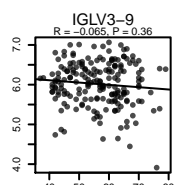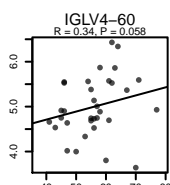

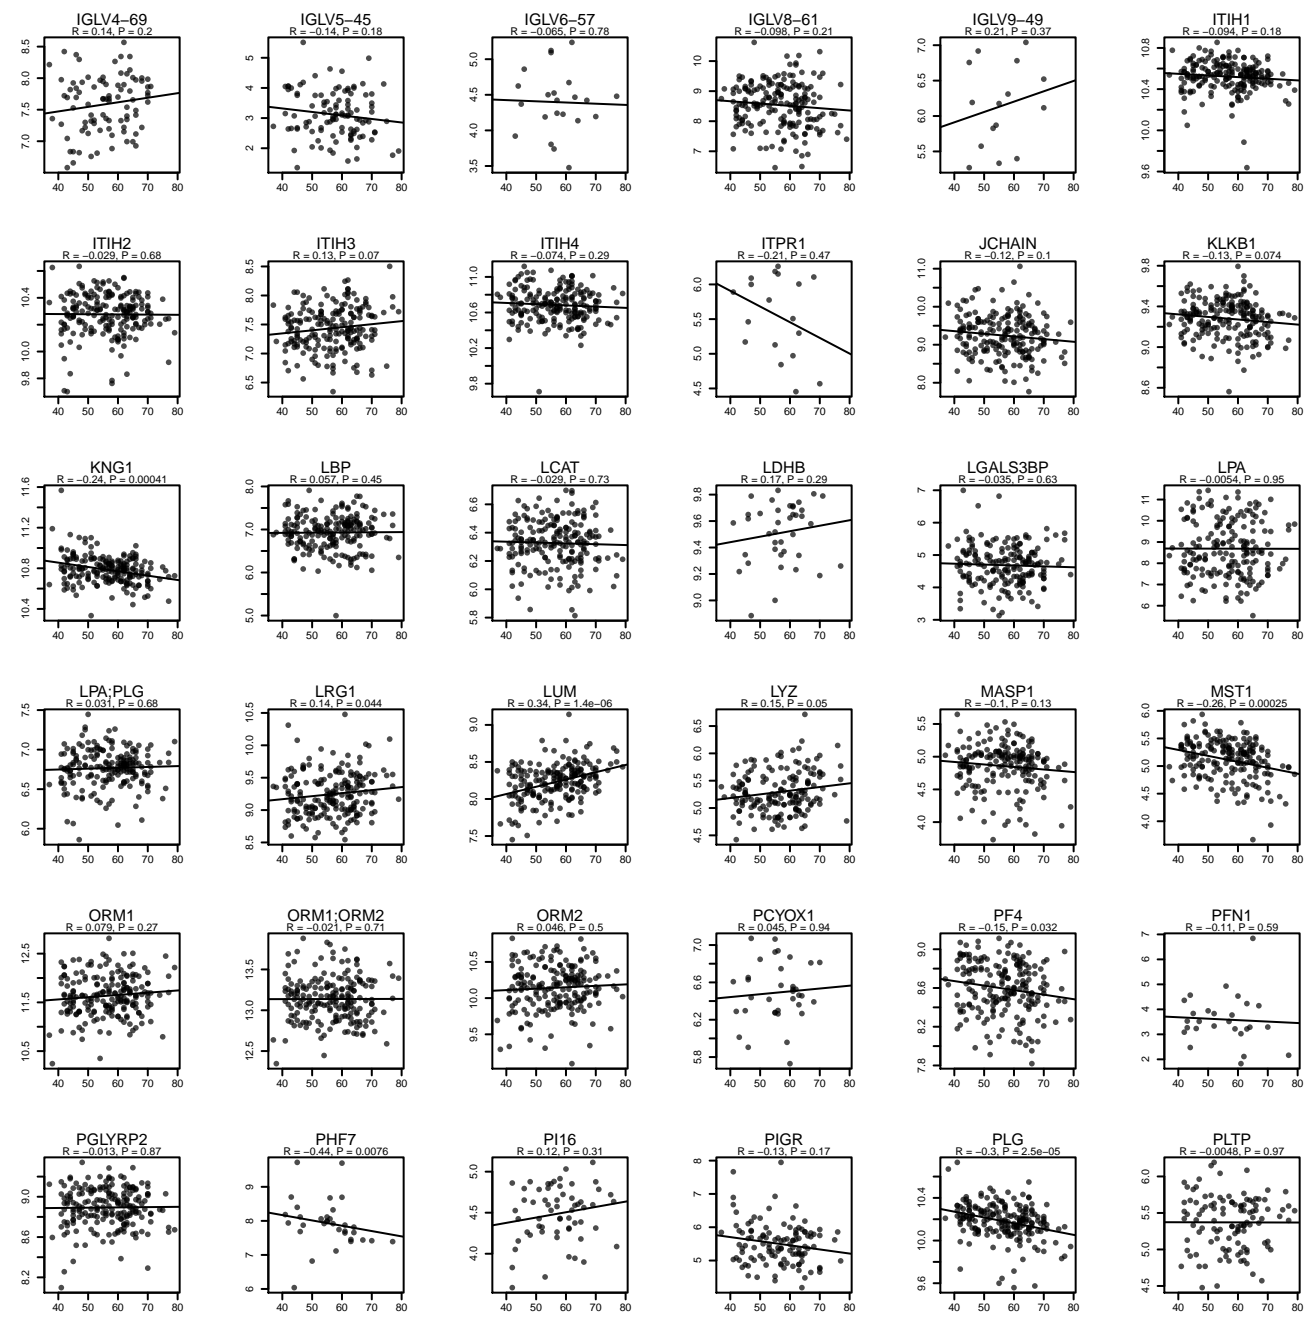

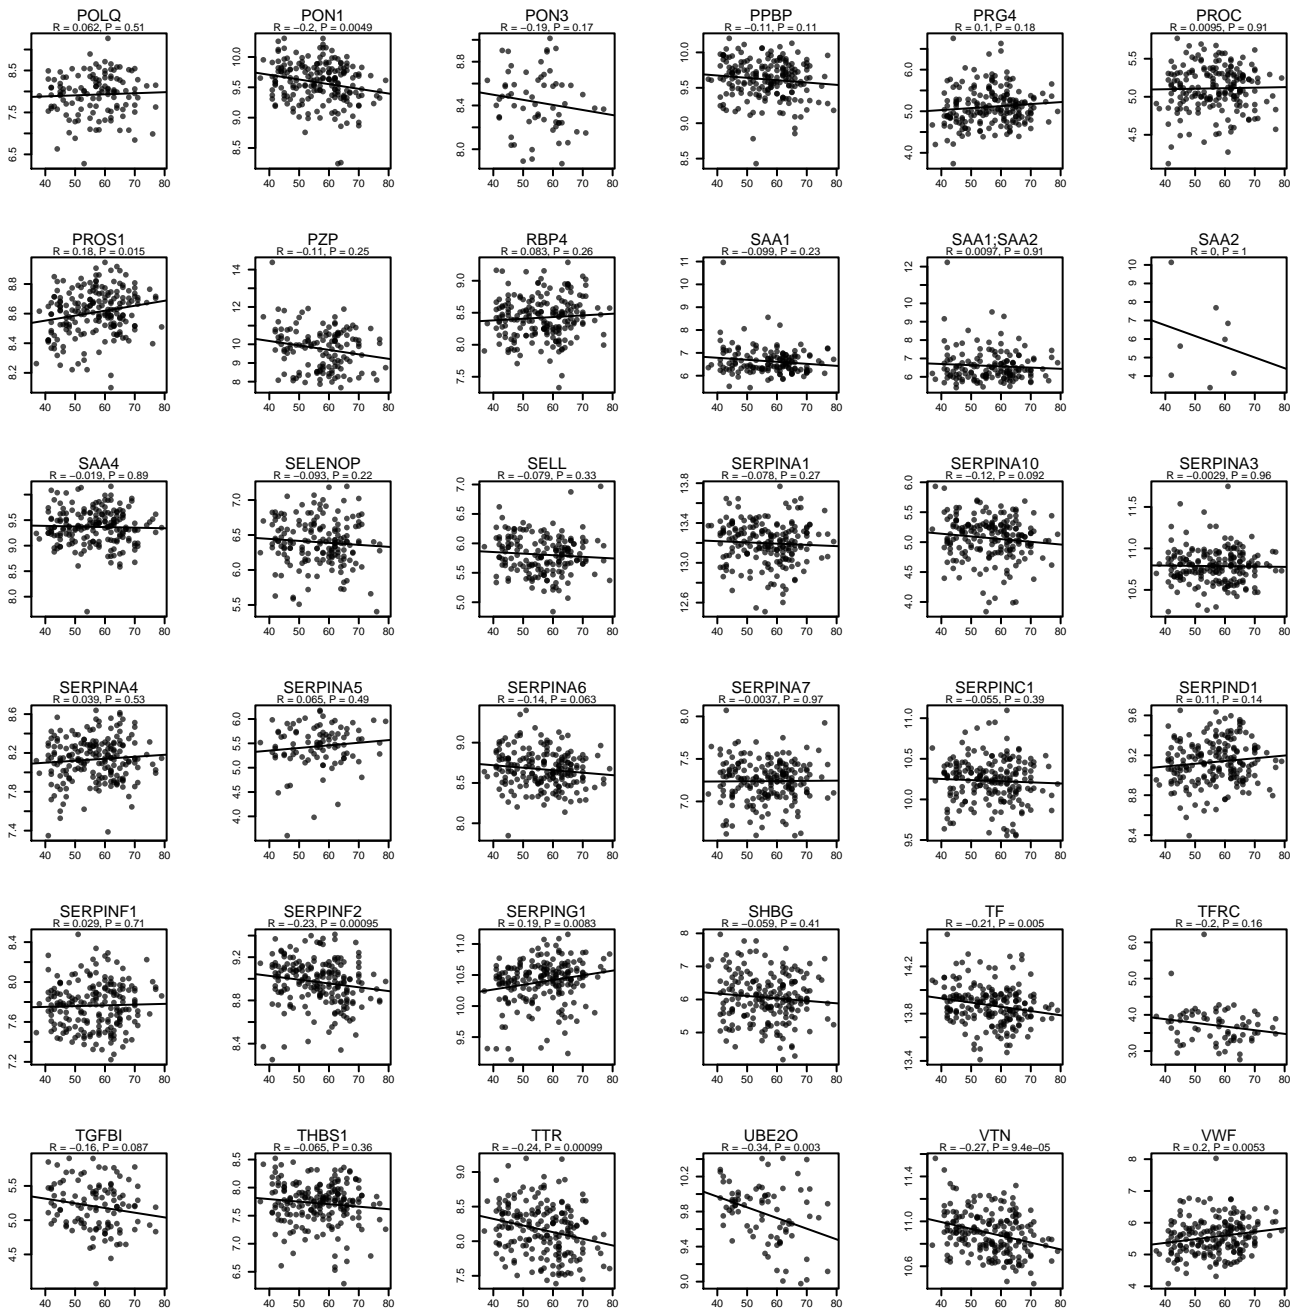



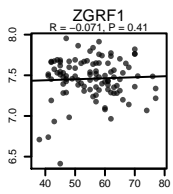

Supplement: Supplementary file [file media-1.zip]
