# Supplementary material for: A time-resolved proteomic and diagnostic map characterizes COVID-19 disease progression and predicts outcome
Source: bioRxiv or medRxiv preprint supplement (doi:10.1101/2020.11.09.20228015), 2020-11-12

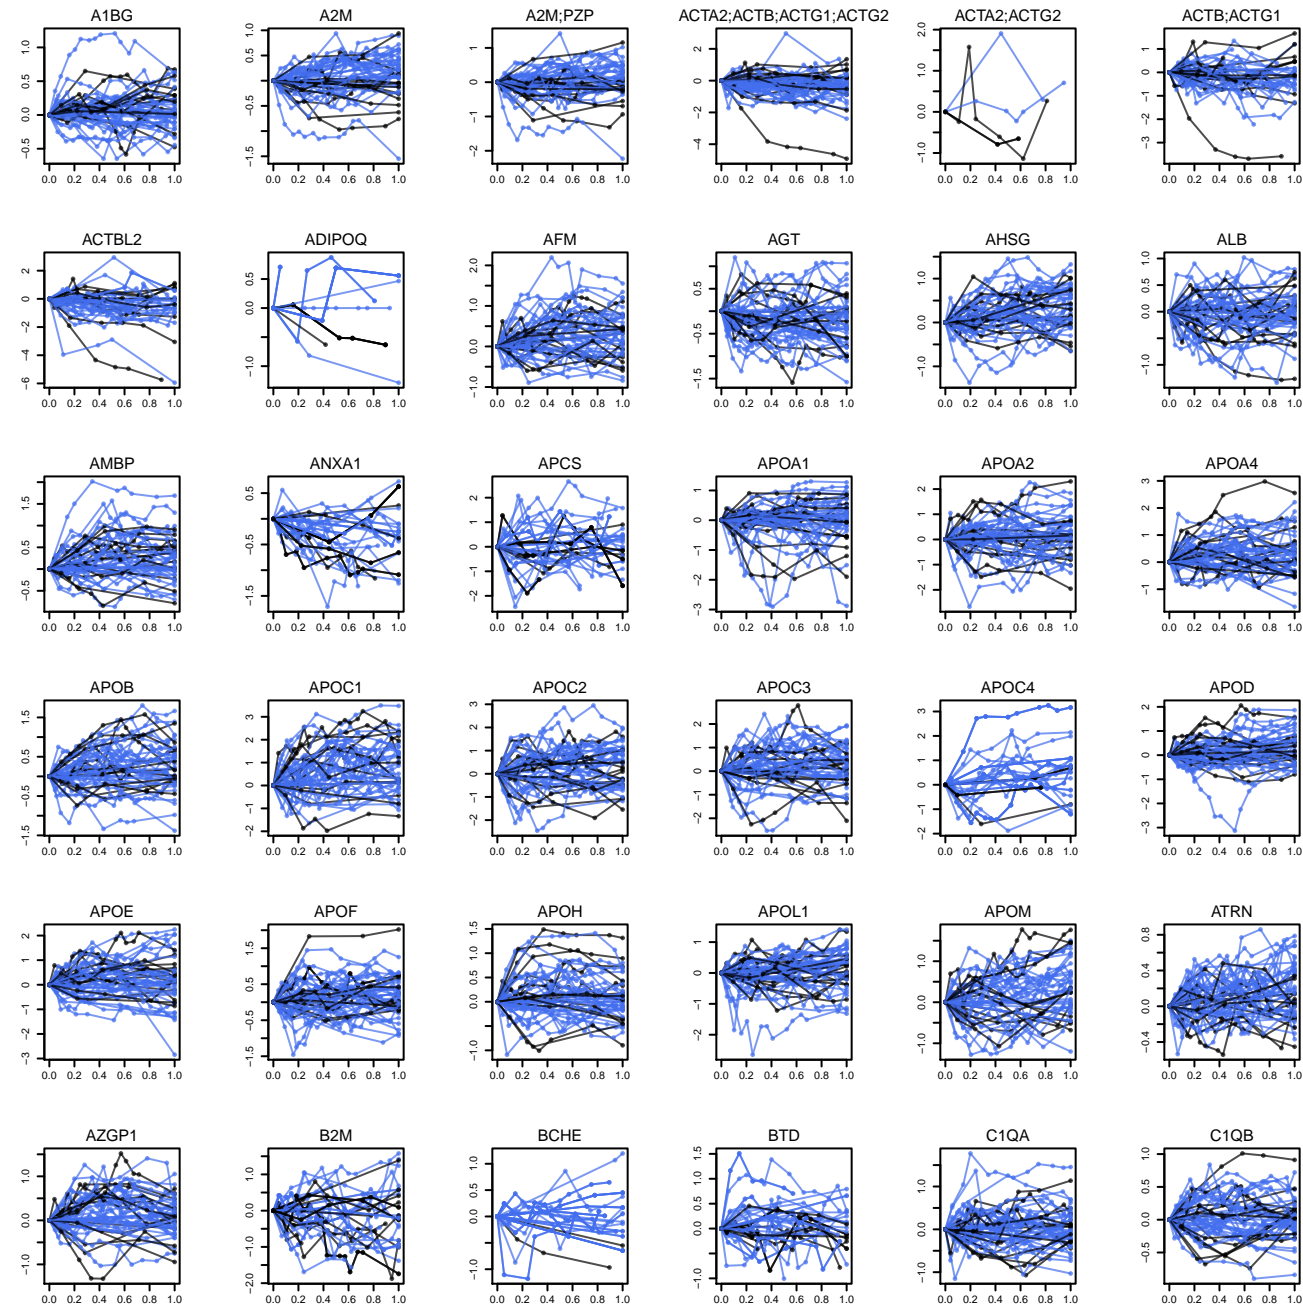

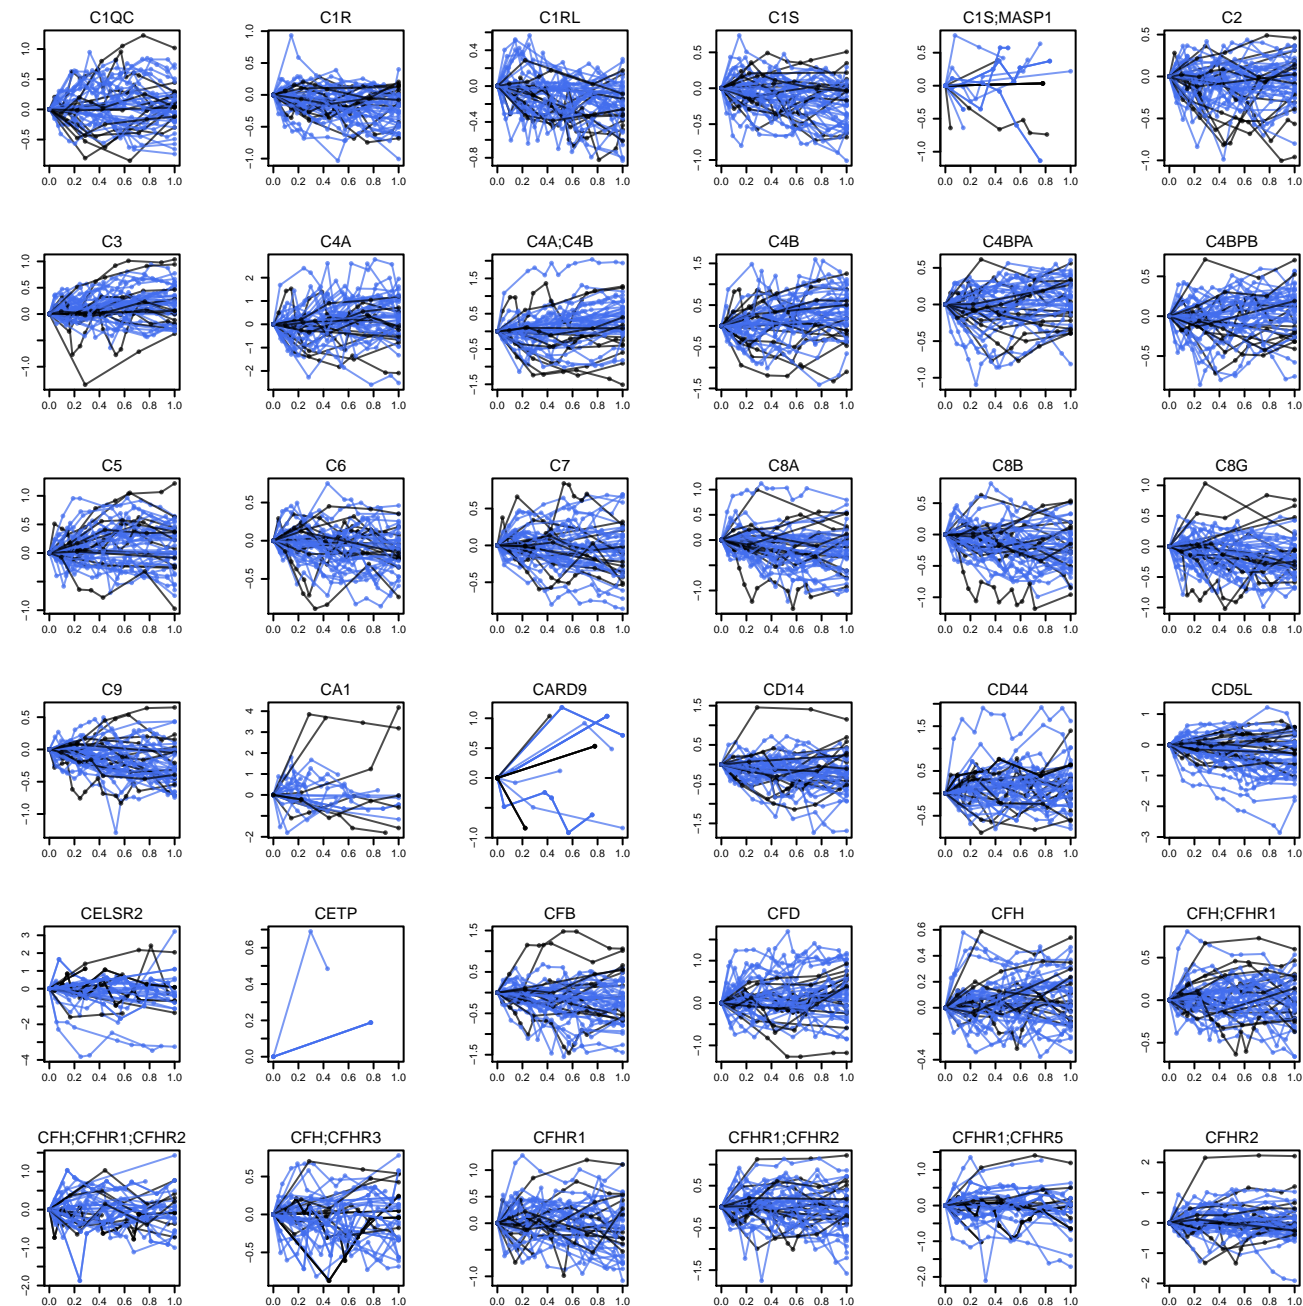

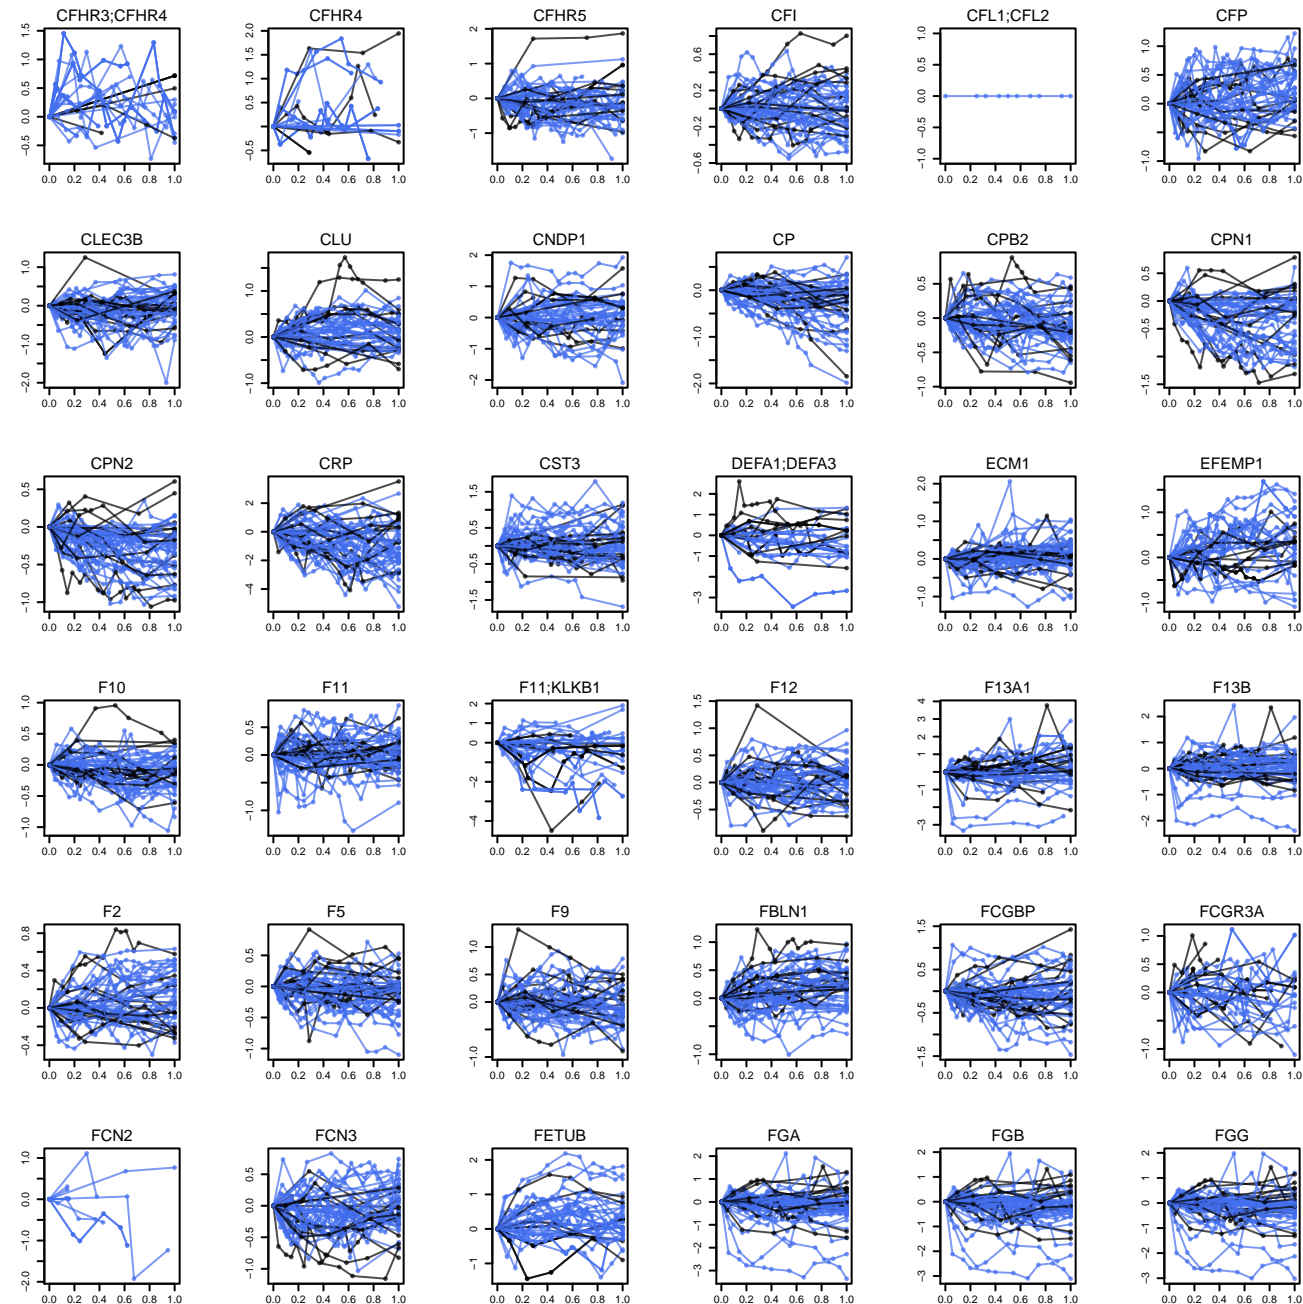

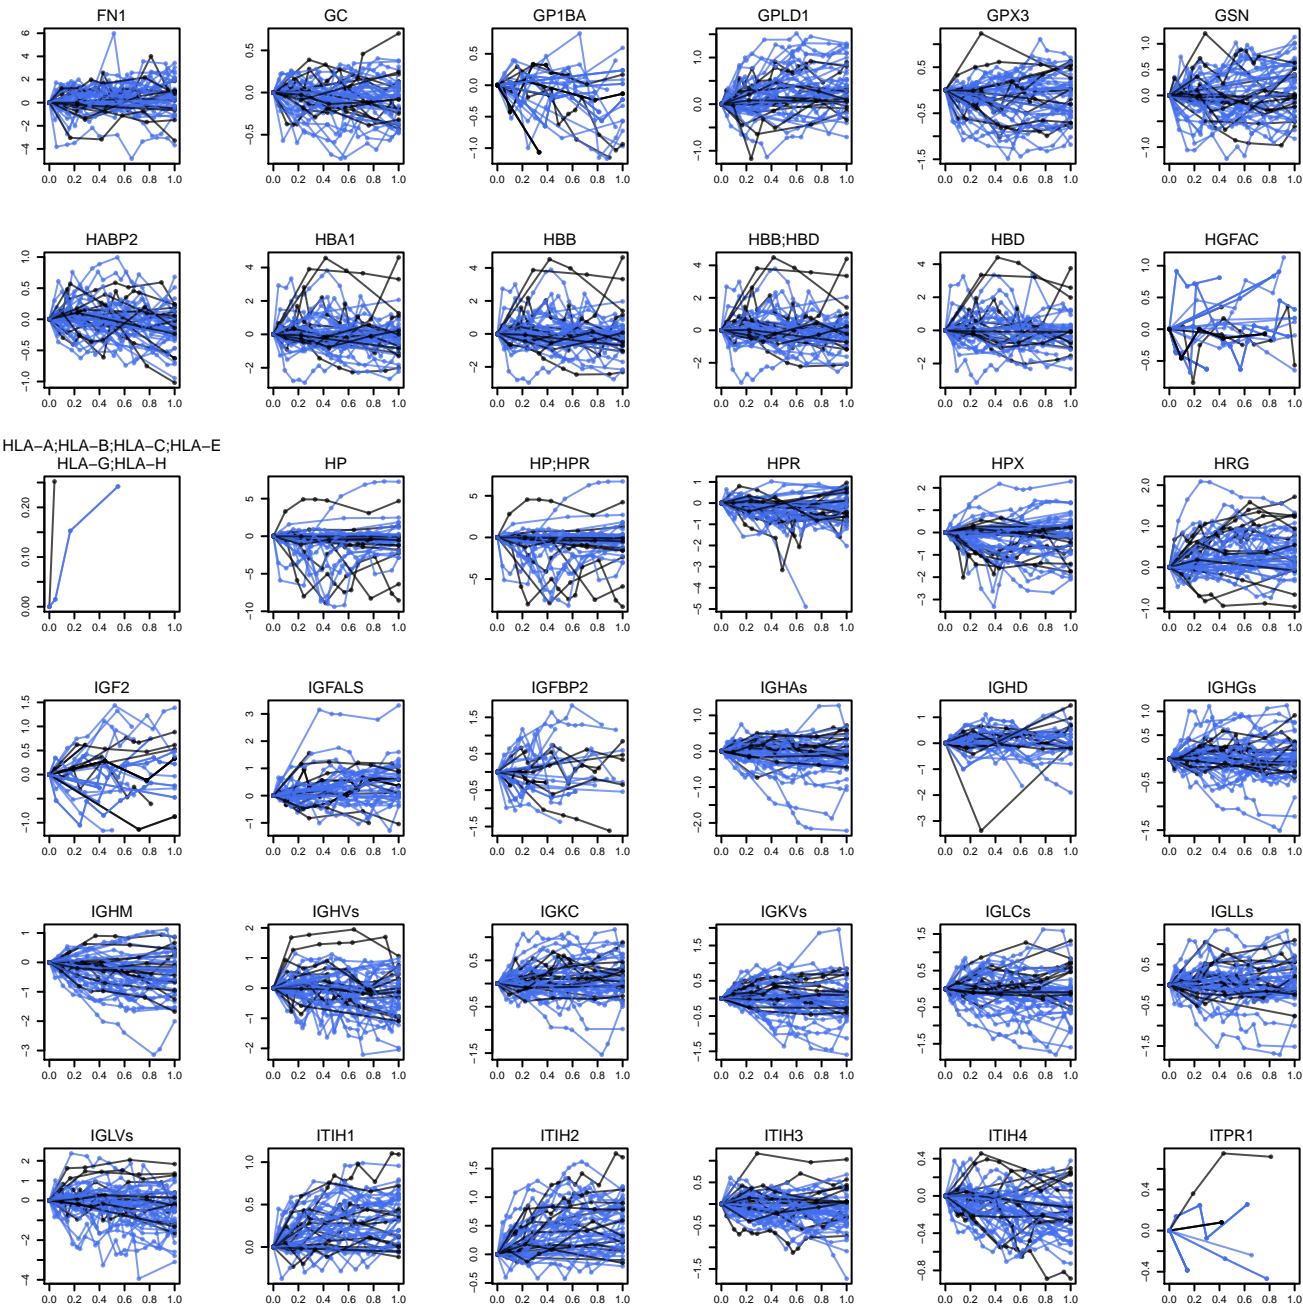



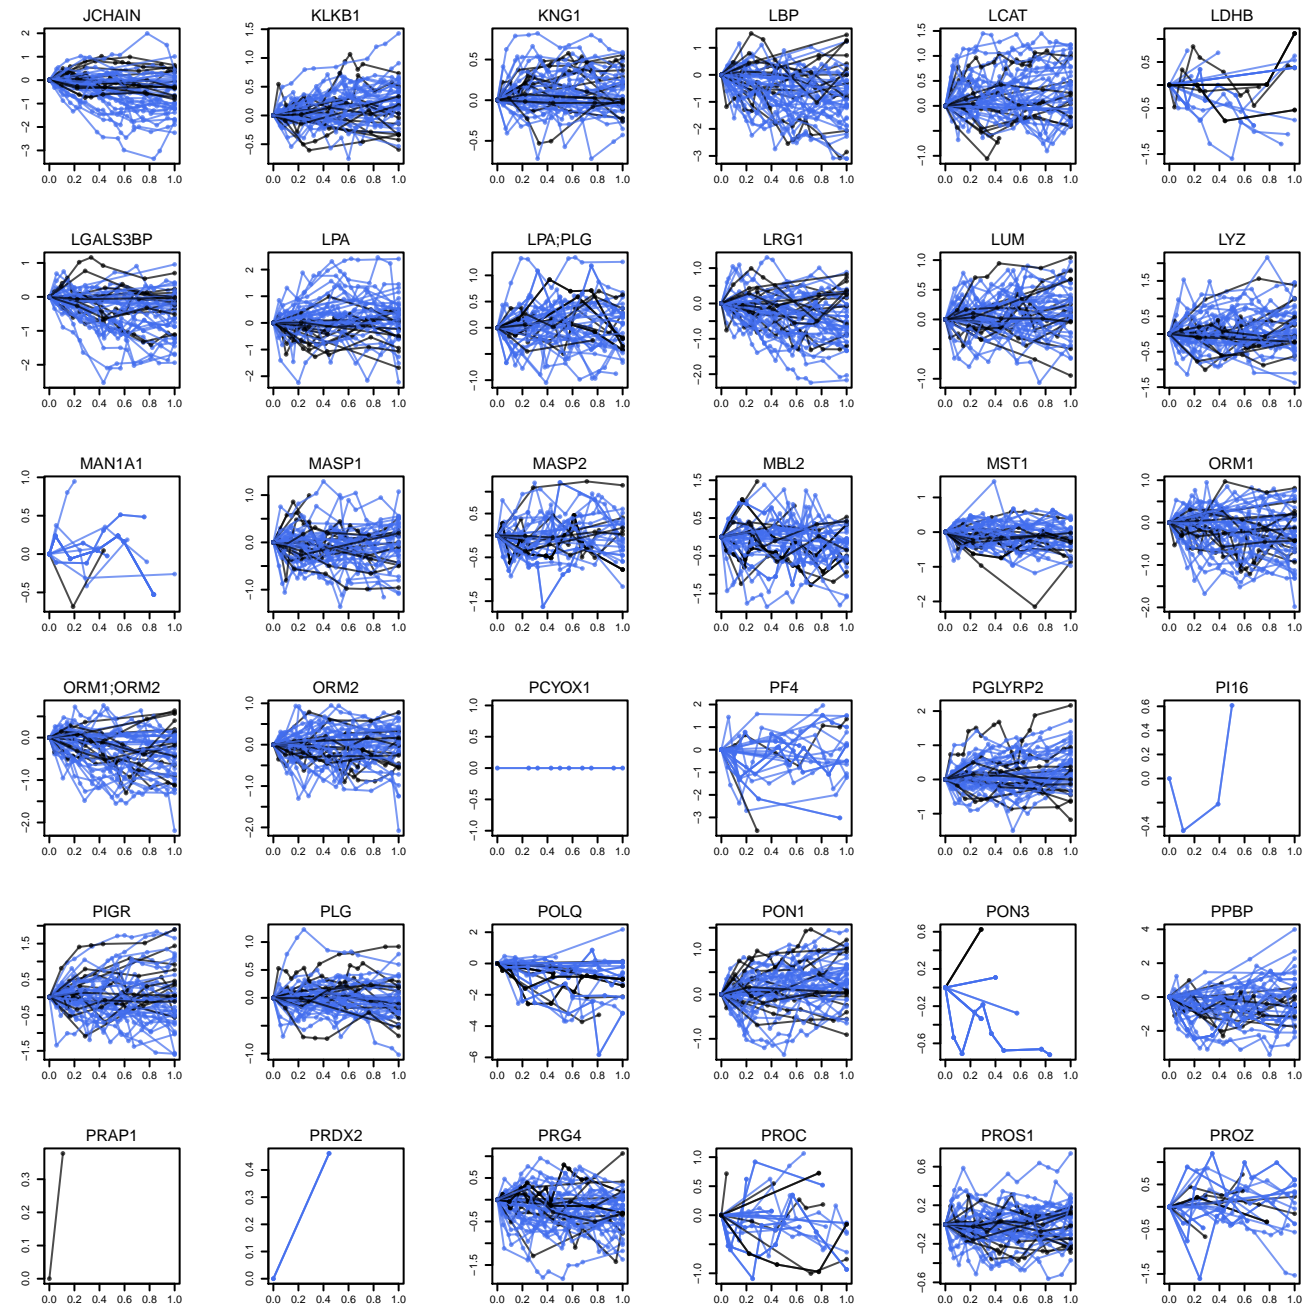

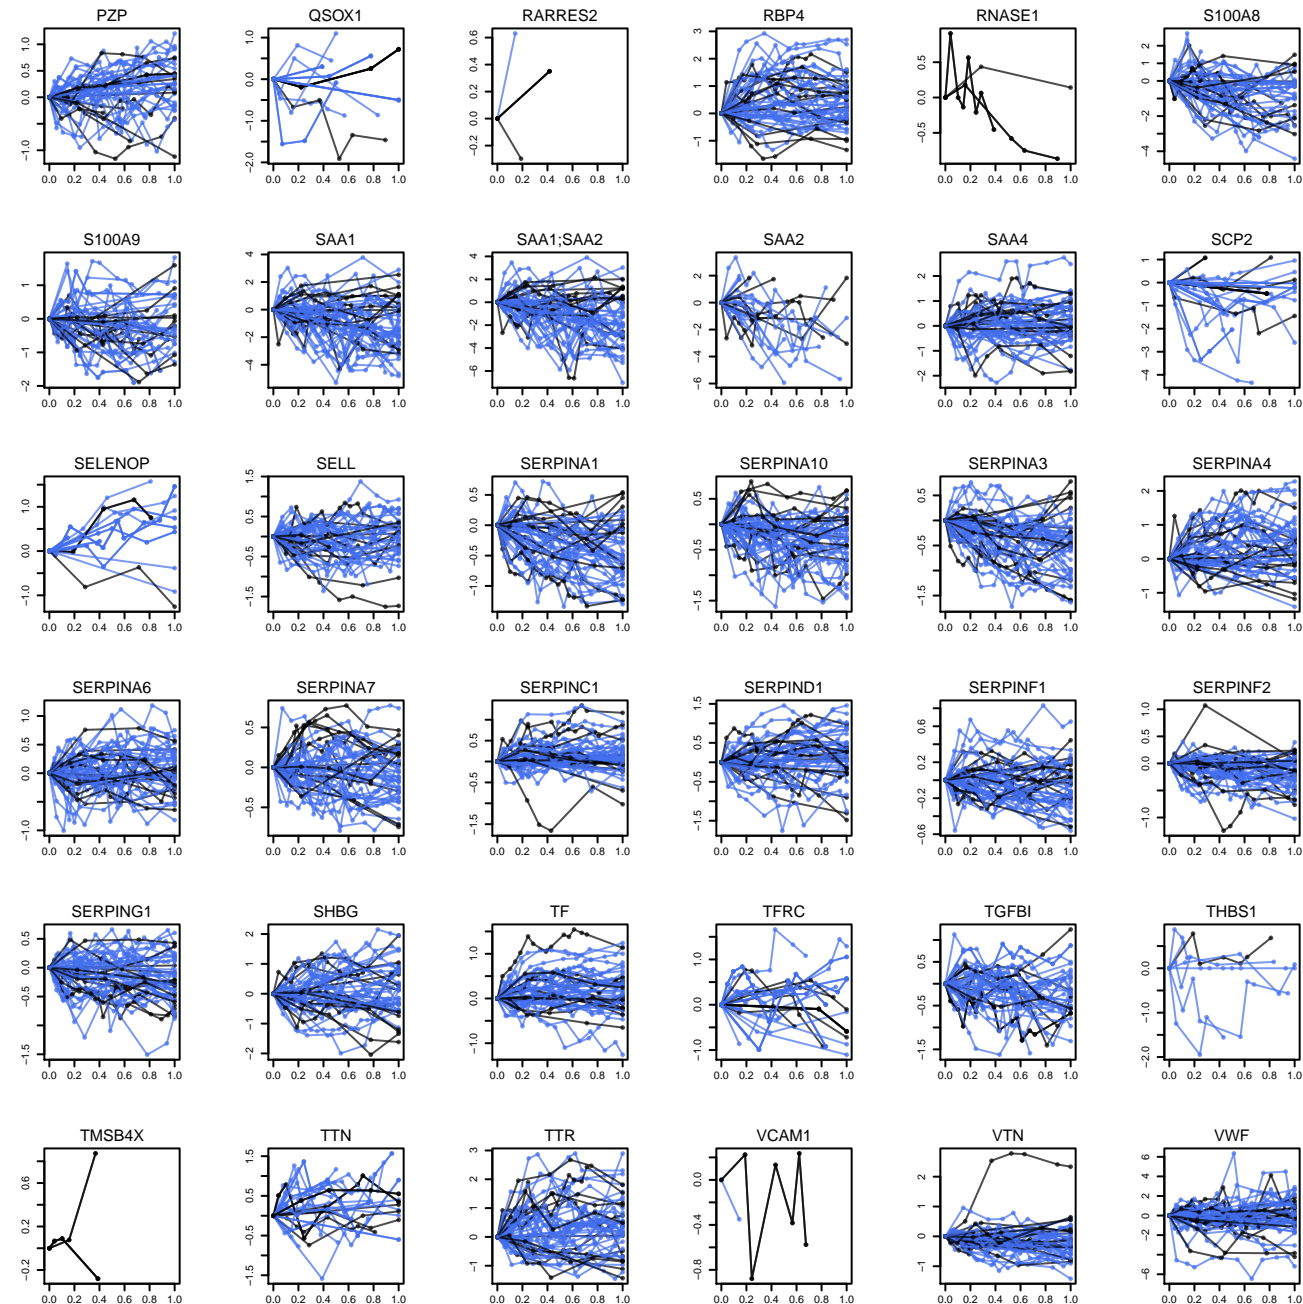

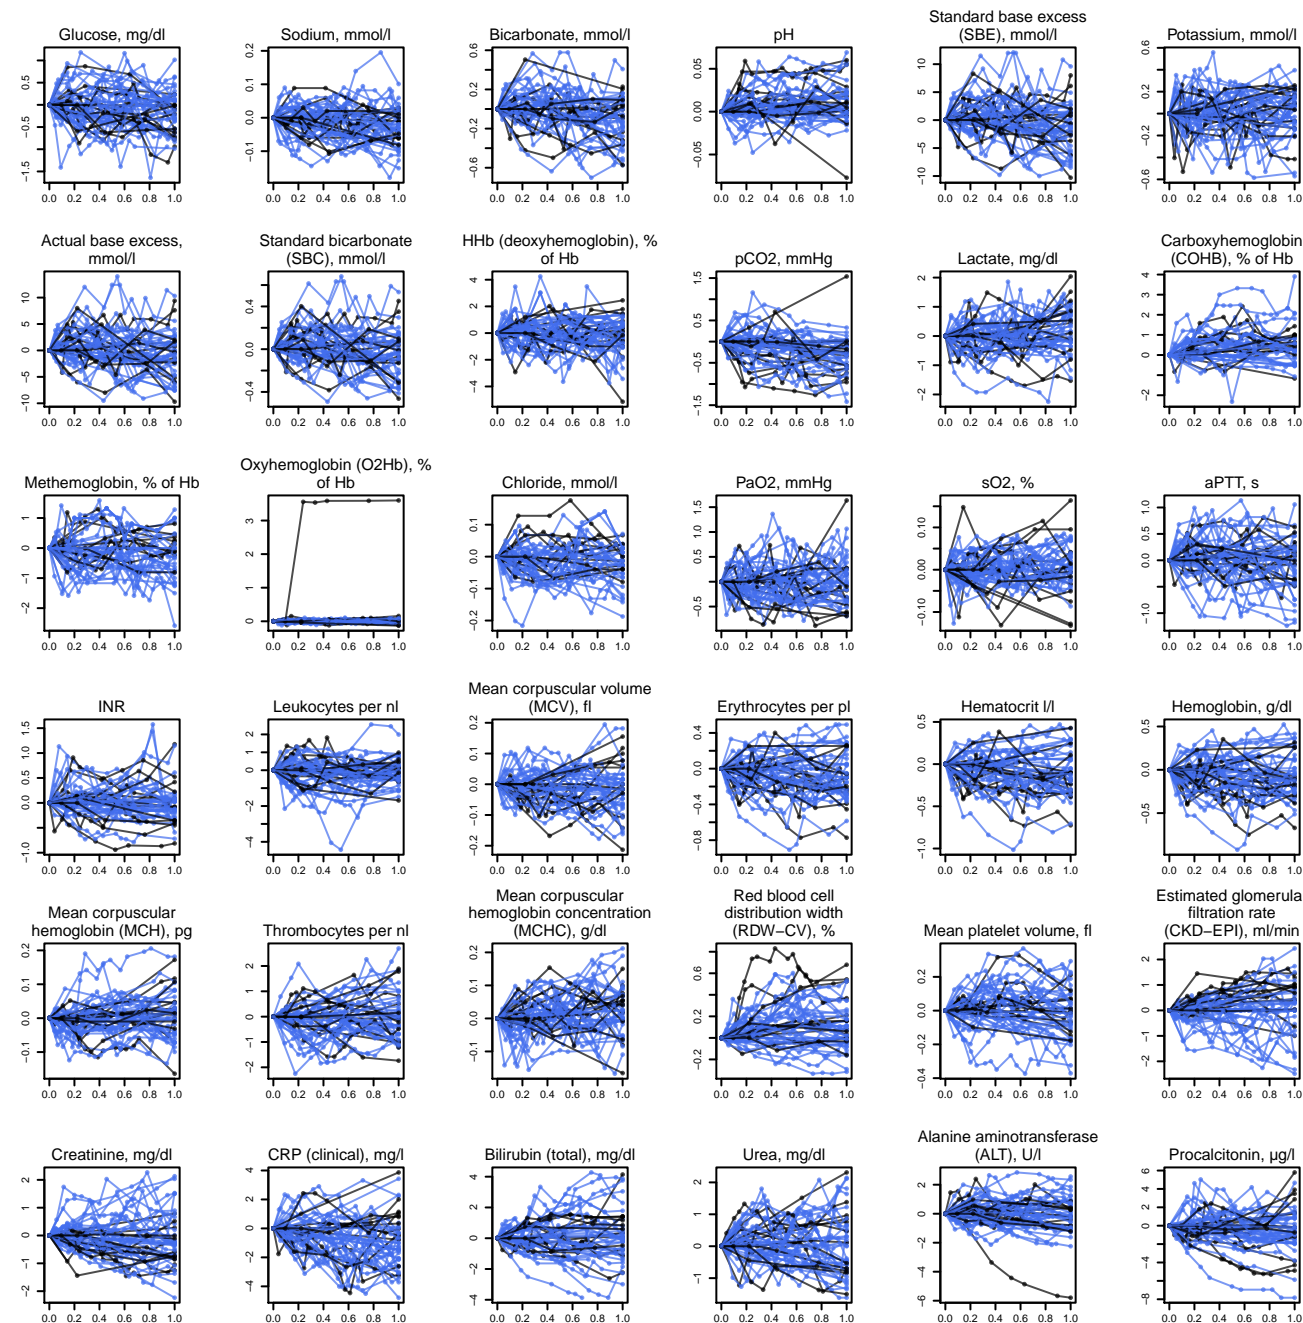

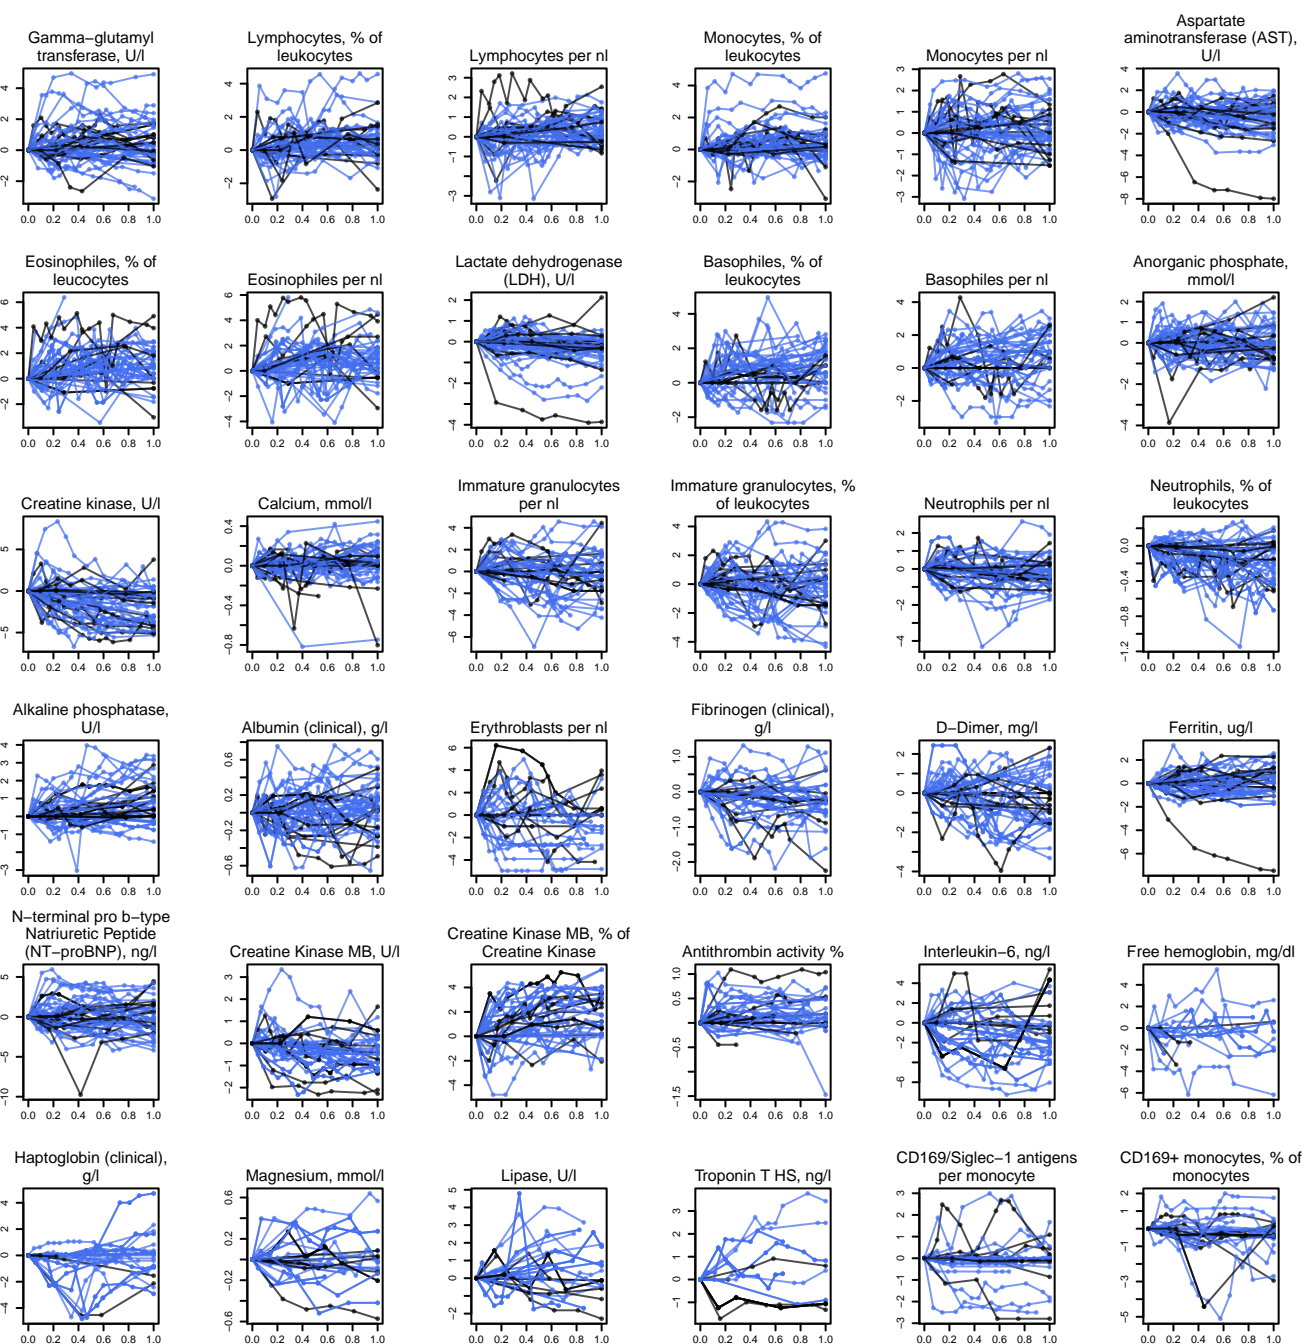



Highly fluorescent lymphocytes per  $\mu$ l

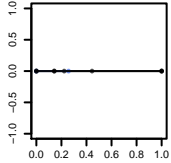

Basal TSH, mU/l

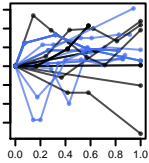

Triglycerides, mg/dl

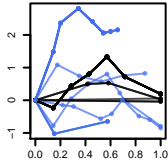

Reticulocyte hemoglobin equivalent, pg

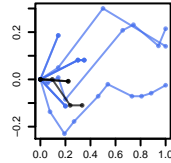

Reticulocyte production index (RPI)

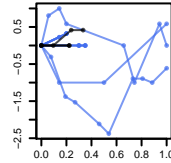

Reticulocytes per nl

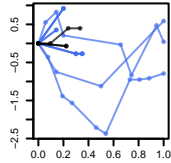

Myoglobin, ug/l

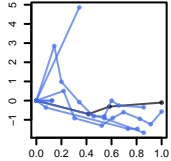

Reticulocytes, % of erythrocytes

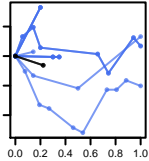

Bilirubin (direct), mg/dl

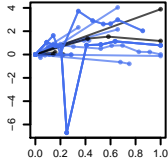

Neutrophil activity

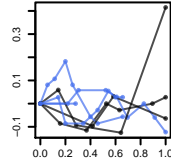

Neutrophil granularity intensity

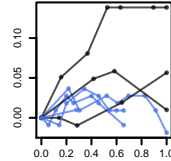

Segment core granulocytes, % of leukocytes

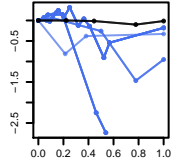

Pseudocholinesterase, kU/l

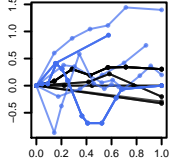

Neutrophil-to-lymphocyte ratio

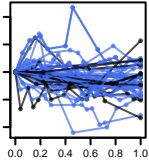

Age

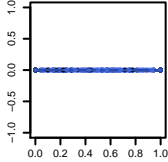

BMI

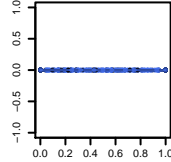

Charlson score

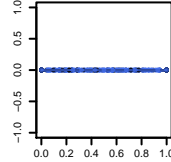

SOFA score

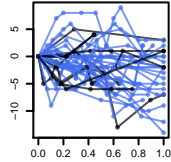

Horowitz index, mmHg

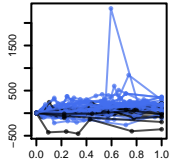

FiO2

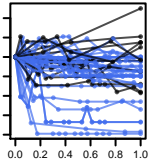

P.Severity

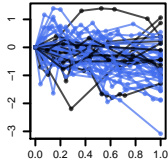

Supplement: Supplementary file [file media-1.zip]
