# Supplementary material for: A time-resolved proteomic and diagnostic map characterizes COVID-19 disease progression and predicts outcome
Source: bioRxiv or medRxiv preprint supplement (doi:10.1101/2020.11.09.20228015), 2020-11-12

ACTA2:ACTB:ACTG1:ACTG2

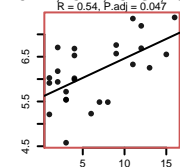

AHSR

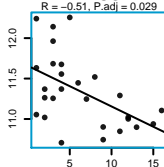

APOB

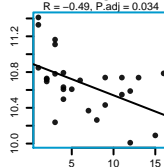

B2M

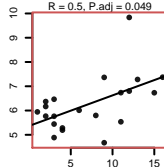

C1QA

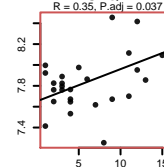

C1QB

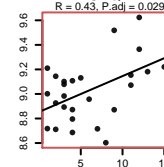

C1QC

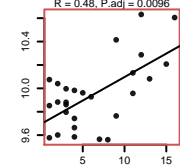

CD14

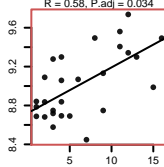

CD44

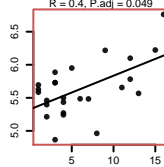

CRP

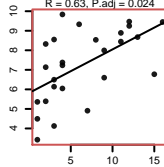

CST3

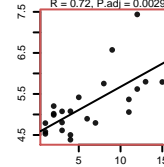

GPLD1

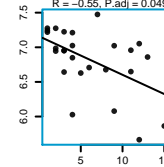

KLKB1

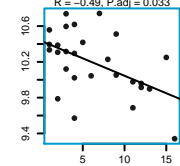

LYZ

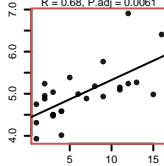

ORM1

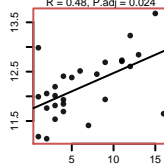

ORM1:ORM2

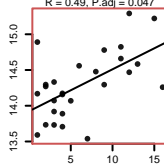

PGLYRP2

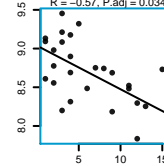

PIGR

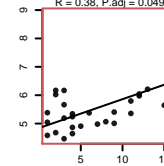

PLG

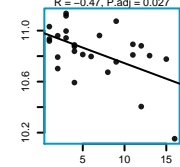

SERPINA3

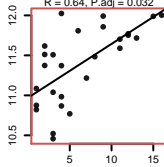

SERPIND1

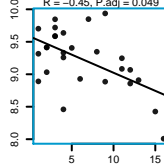

SERPING1

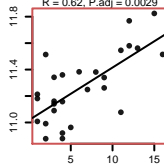

TF

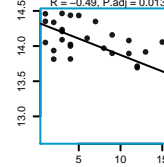

TFRC

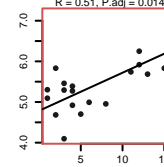

TTR

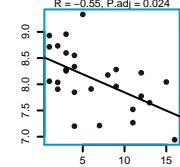

VWF

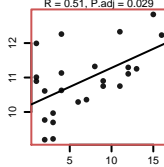

Erythrocytes per pl

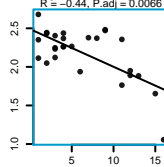

Hematocrit, l/l

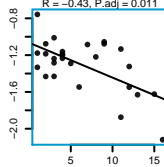

Hemoglobin, g/dl

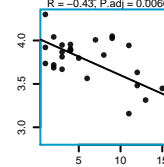

Red blood cell distribution width (RDW-CV), %

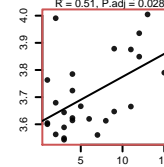

Estimated glomerular filtration rate (CKD-EPI), ml/min

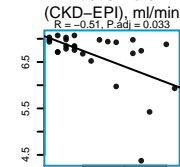

Procalcitonin, ug/l

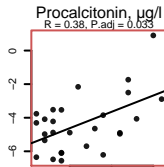

Lactate dehydrogenase (LDH), U/l

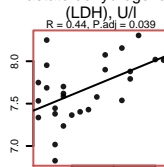

Creatine kinase, U/l

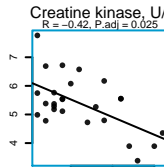

Calcium, mmol/l

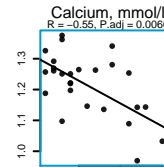

Immature granulocytes per nl

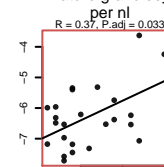

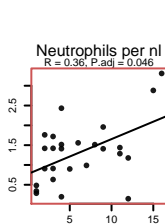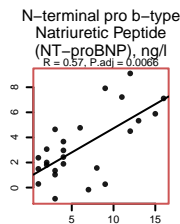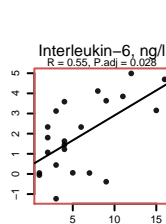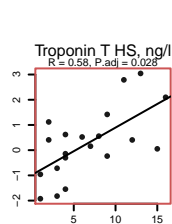

Supplement: Supplementary file [file media-1.zip]
