# Supplementary material for: A time-resolved proteomic and diagnostic map characterizes COVID-19 disease progression and predicts outcome
Source: bioRxiv or medRxiv preprint supplement (doi:10.1101/2020.11.09.20228015), 2020-11-12
Supplement: Supplementary file [file media-1.zip]

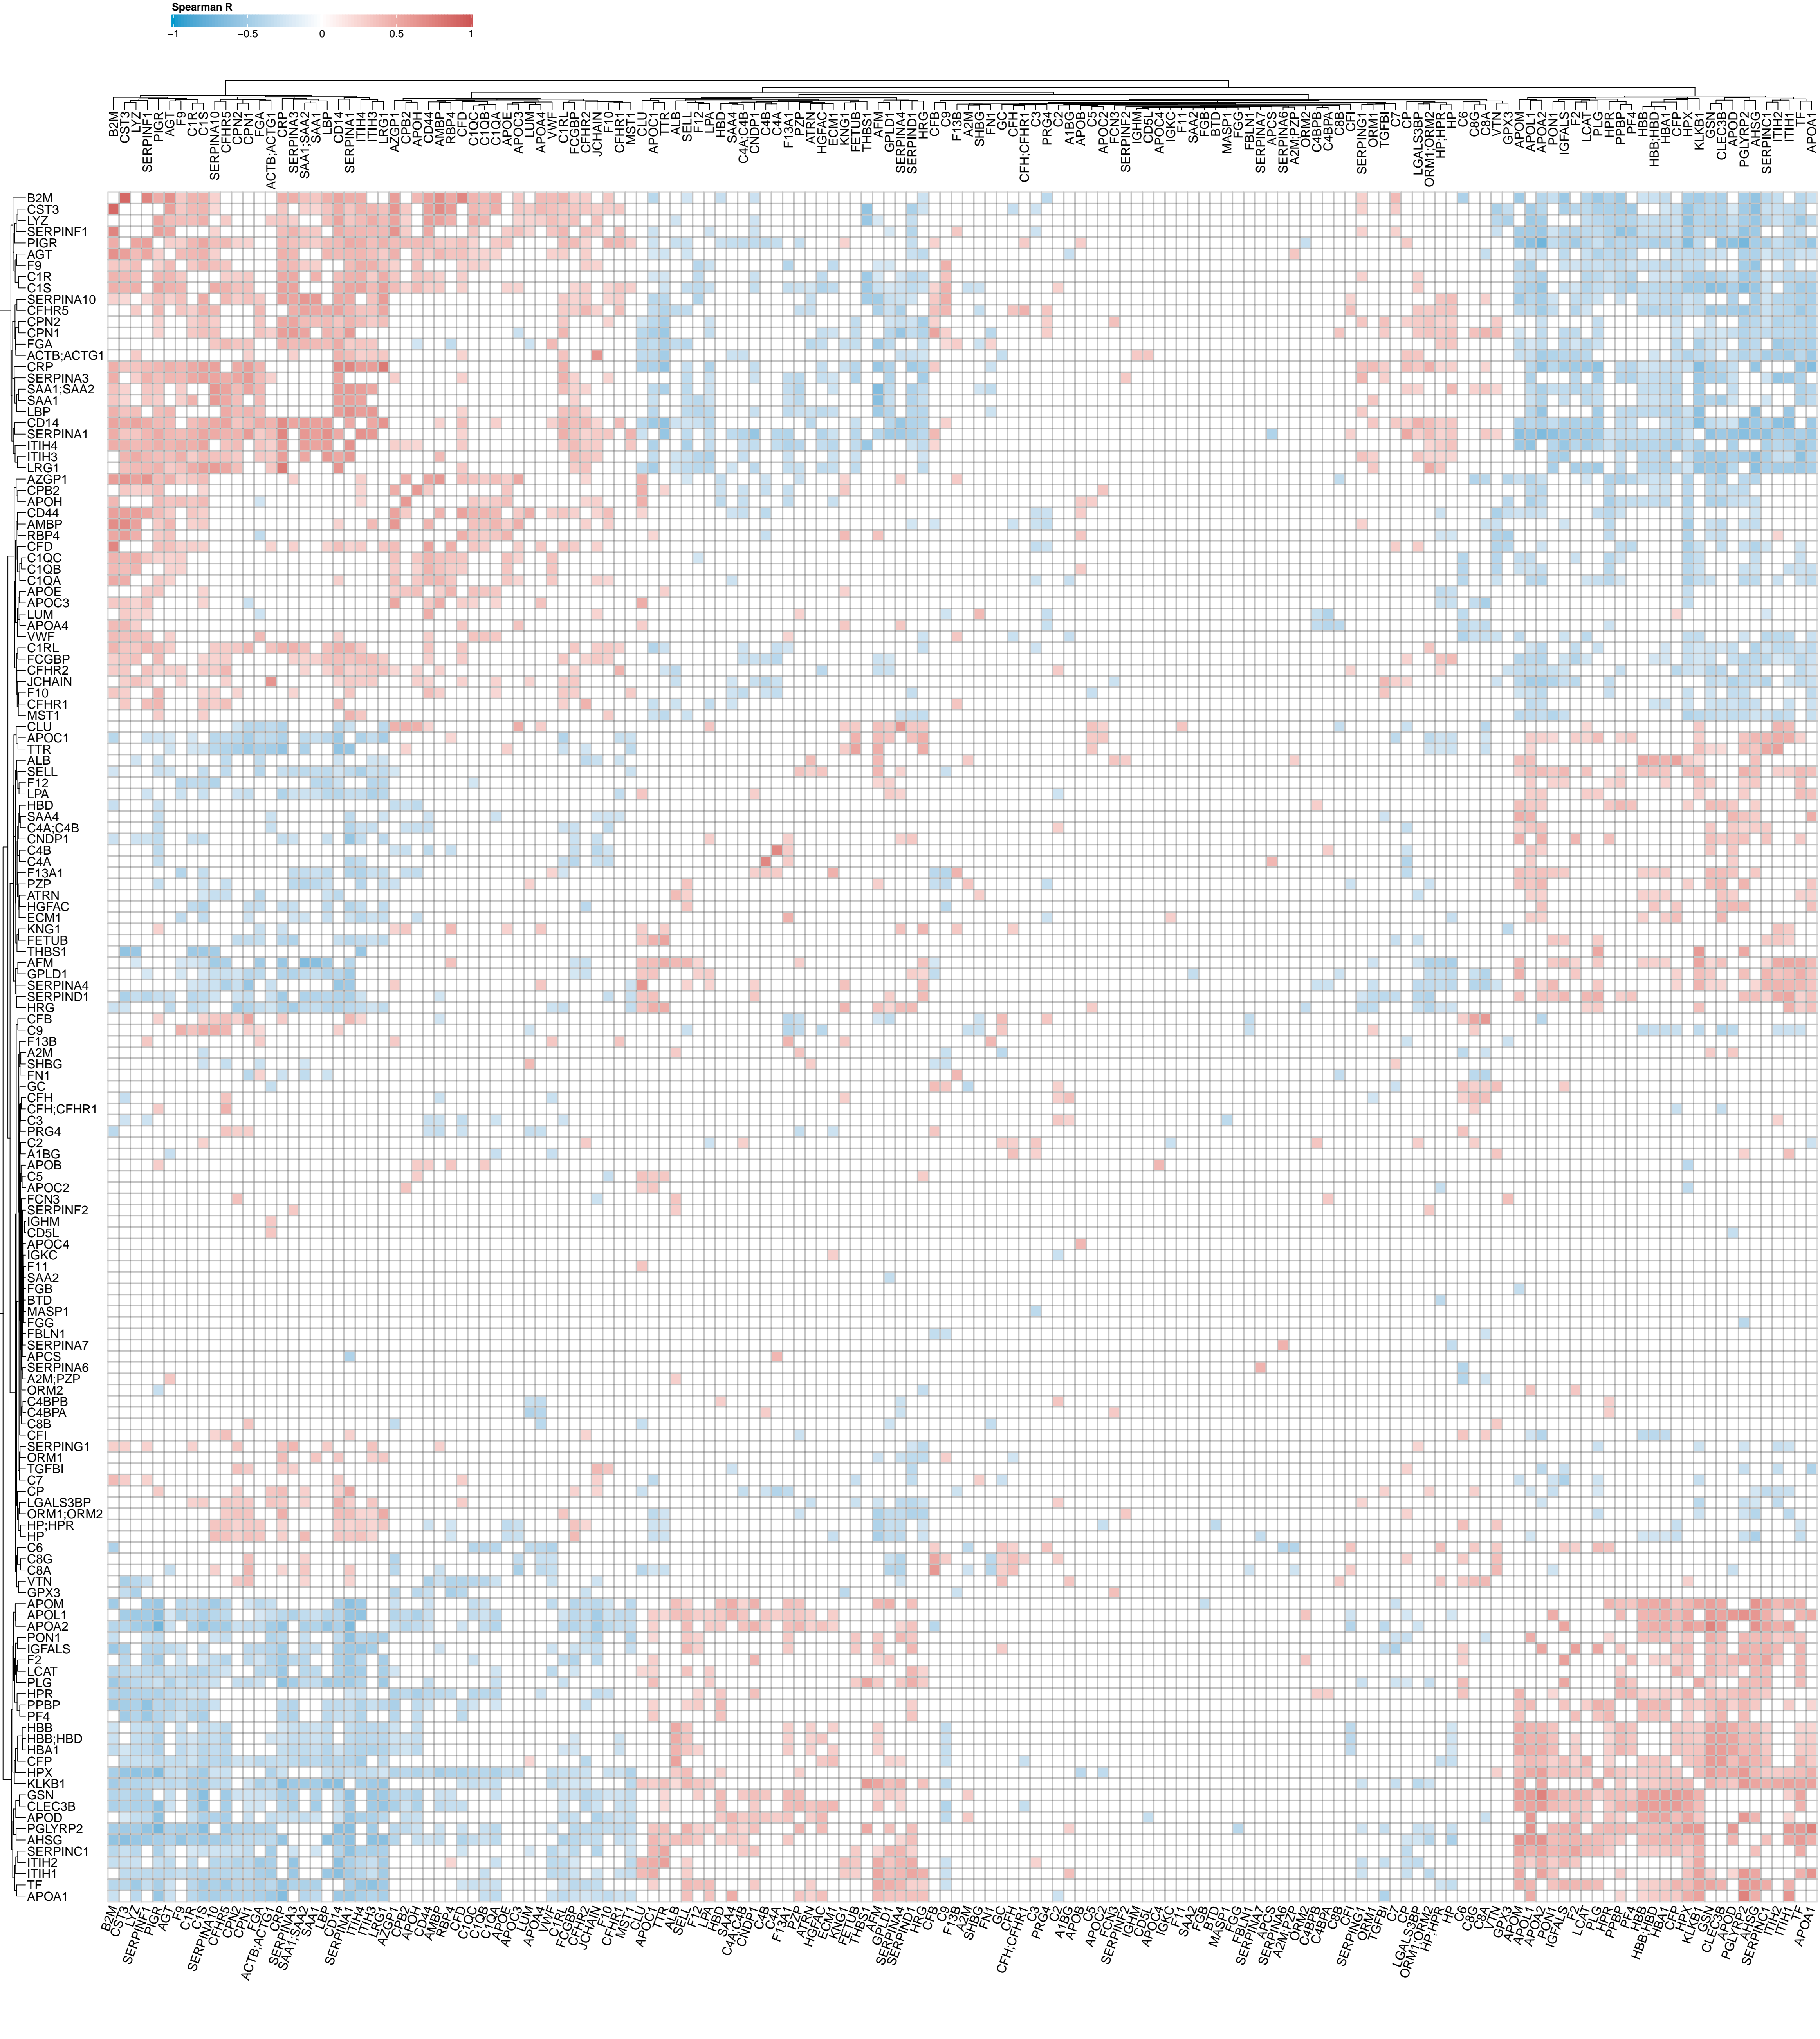

- inflammation
- TRUE
  - FALSE
- immune response
- TRUE
  - FALSE
- complement
- TRUE
  - FALSE
- coagulation
- TRUE
  - FALSE
- tissue remodeling/repair
- TRUE
  - FALSE
- lipid metabolism
- TRUE
  - FALSE
