# Supplementary material for: A time-resolved proteomic and diagnostic map characterizes COVID-19 disease progression and predicts outcome
Source: bioRxiv or medRxiv preprint supplement (doi:10.1101/2020.11.09.20228015), 2020-11-12

a

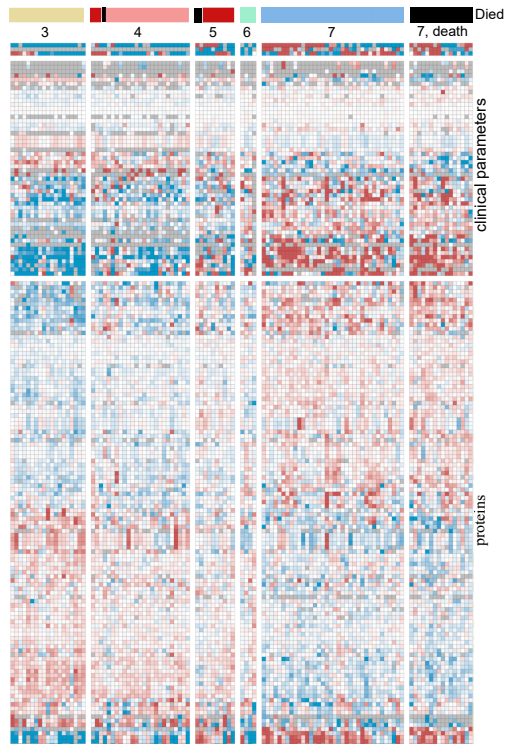

b

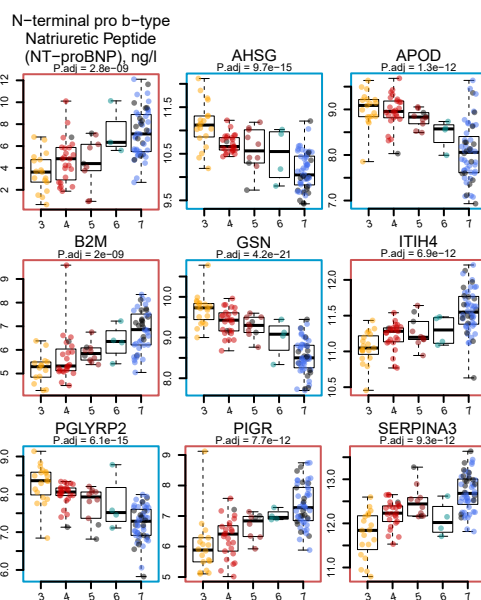

c

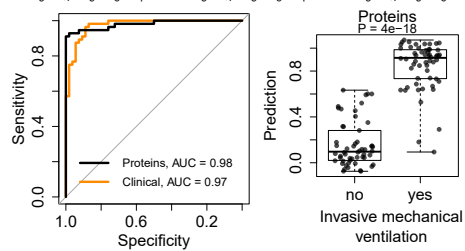

d

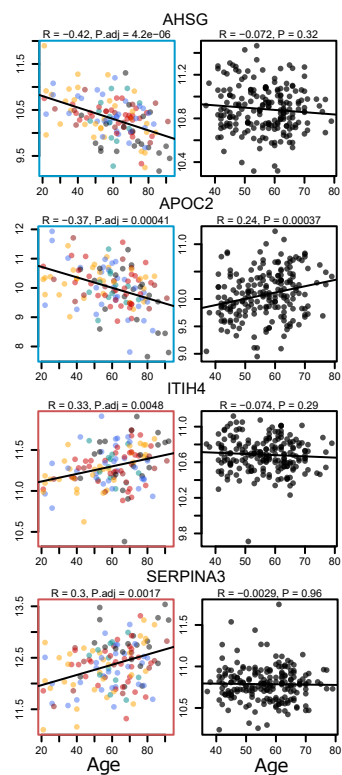

Supplement: Supplementary file [file media-1.zip]
