# Supplementary material for: A time-resolved proteomic and diagnostic map characterizes COVID-19 disease progression and predicts outcome
Source: bioRxiv or medRxiv preprint supplement (doi:10.1101/2020.11.09.20228015), 2020-11-12

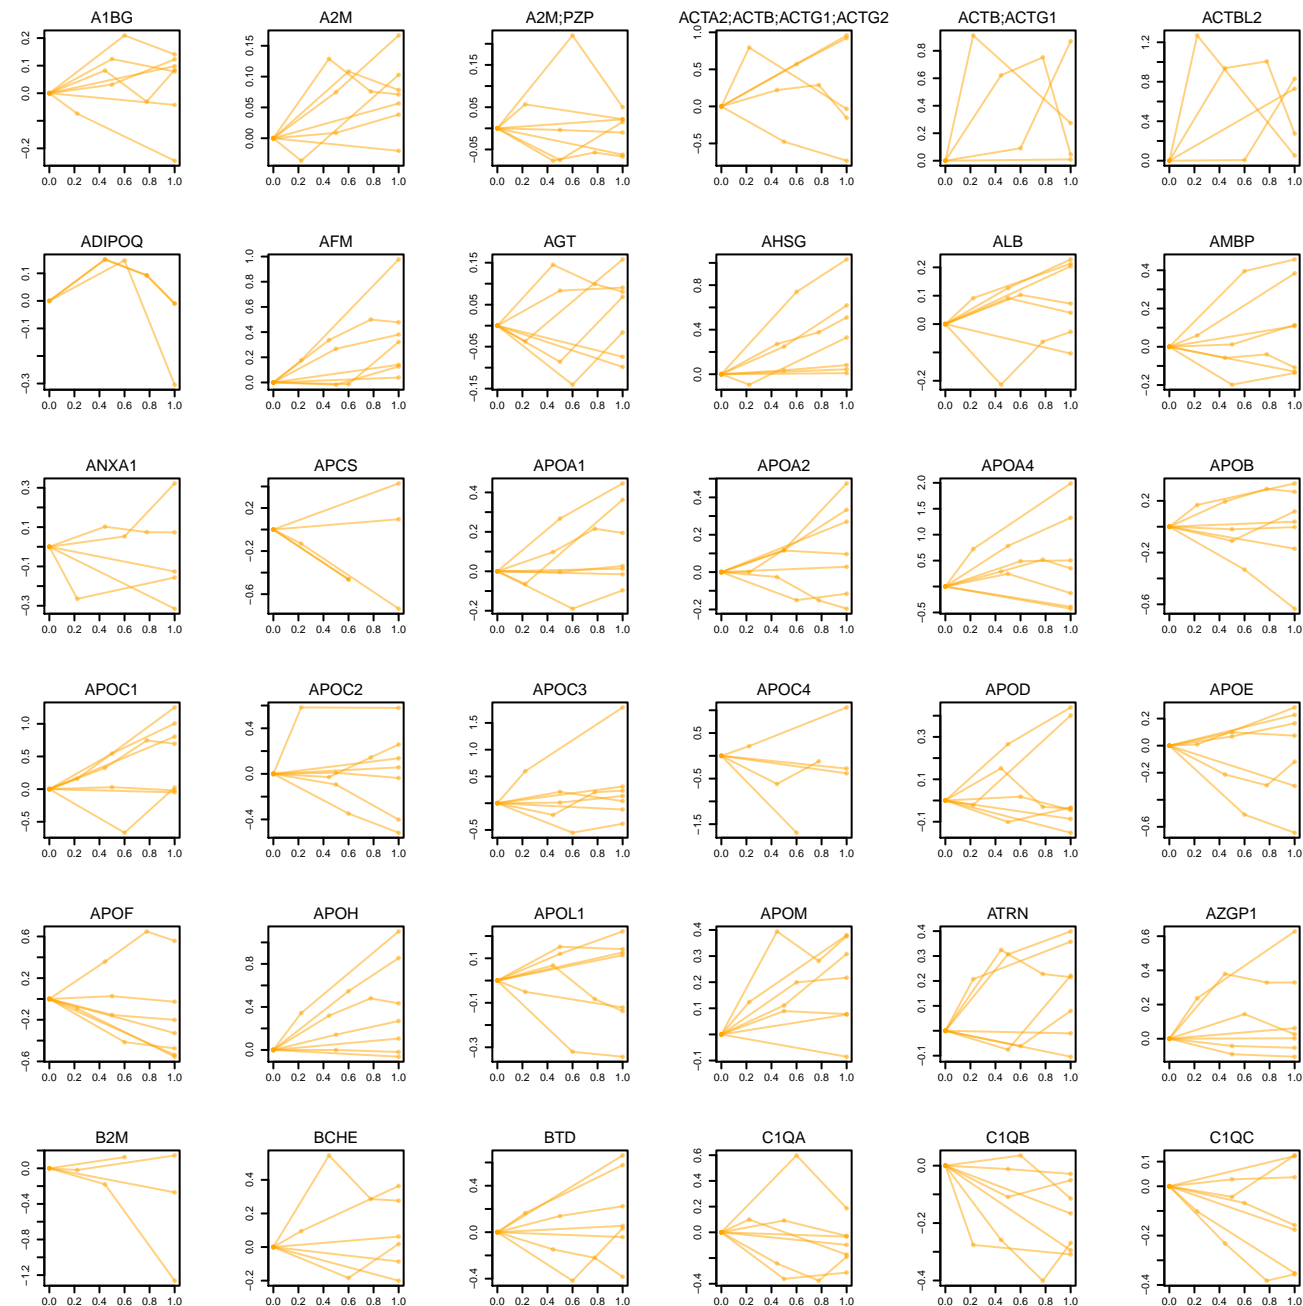

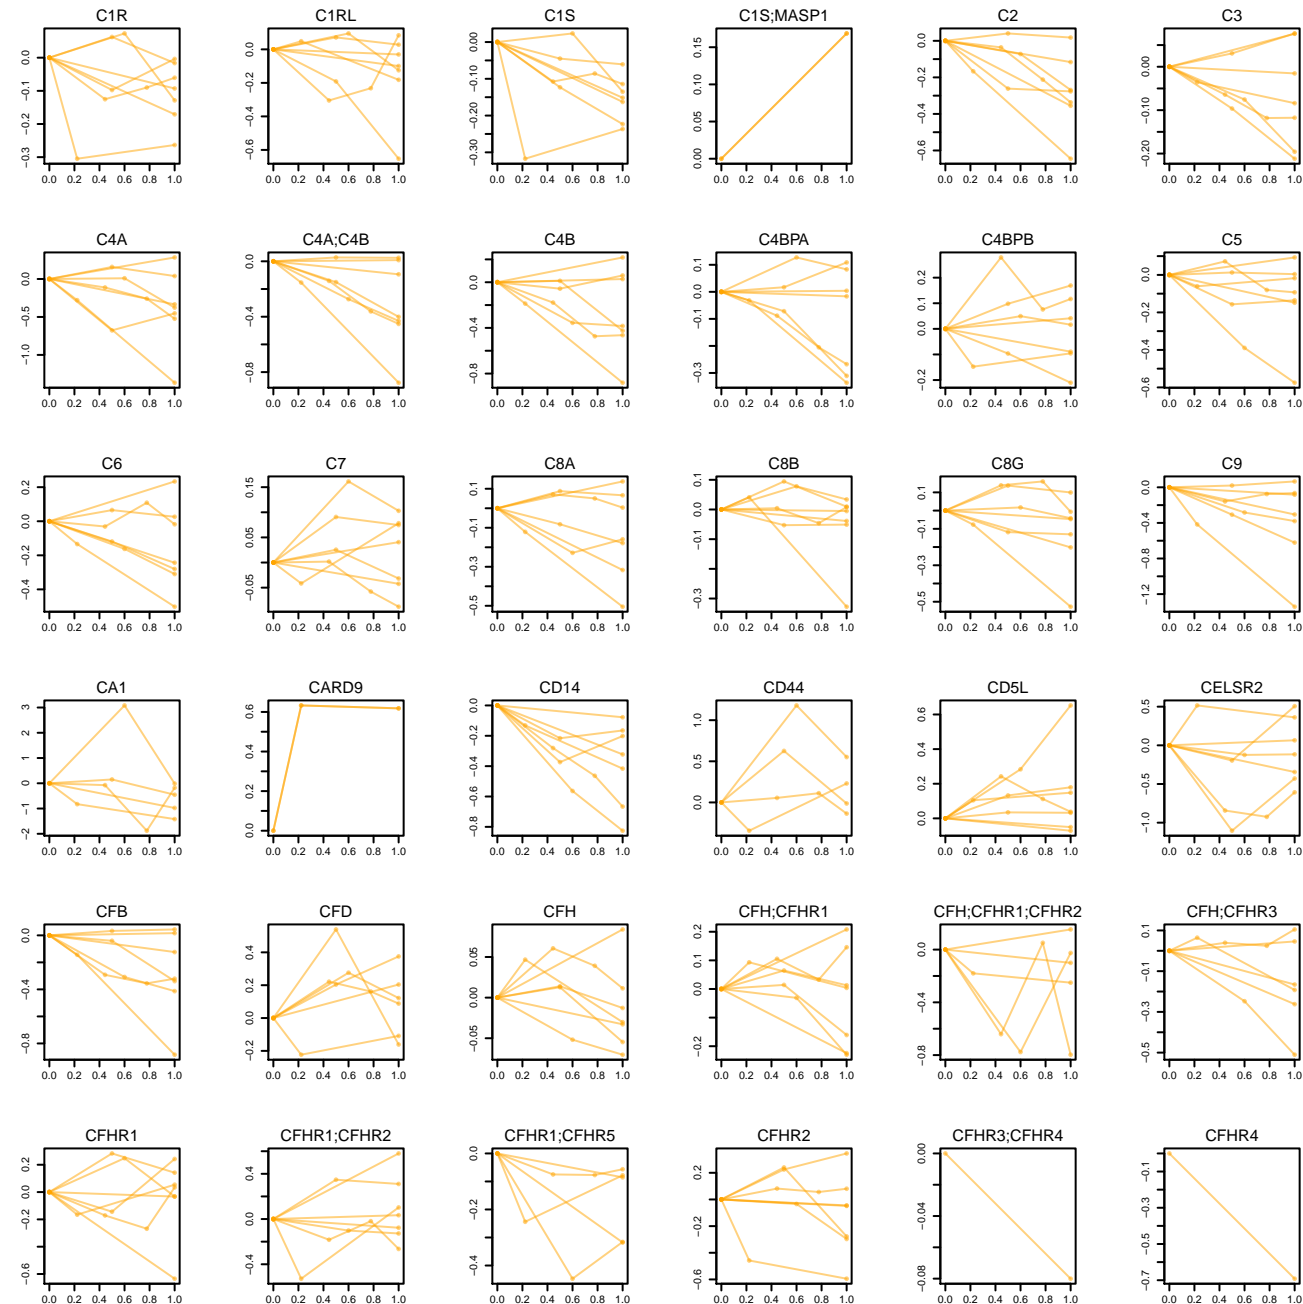

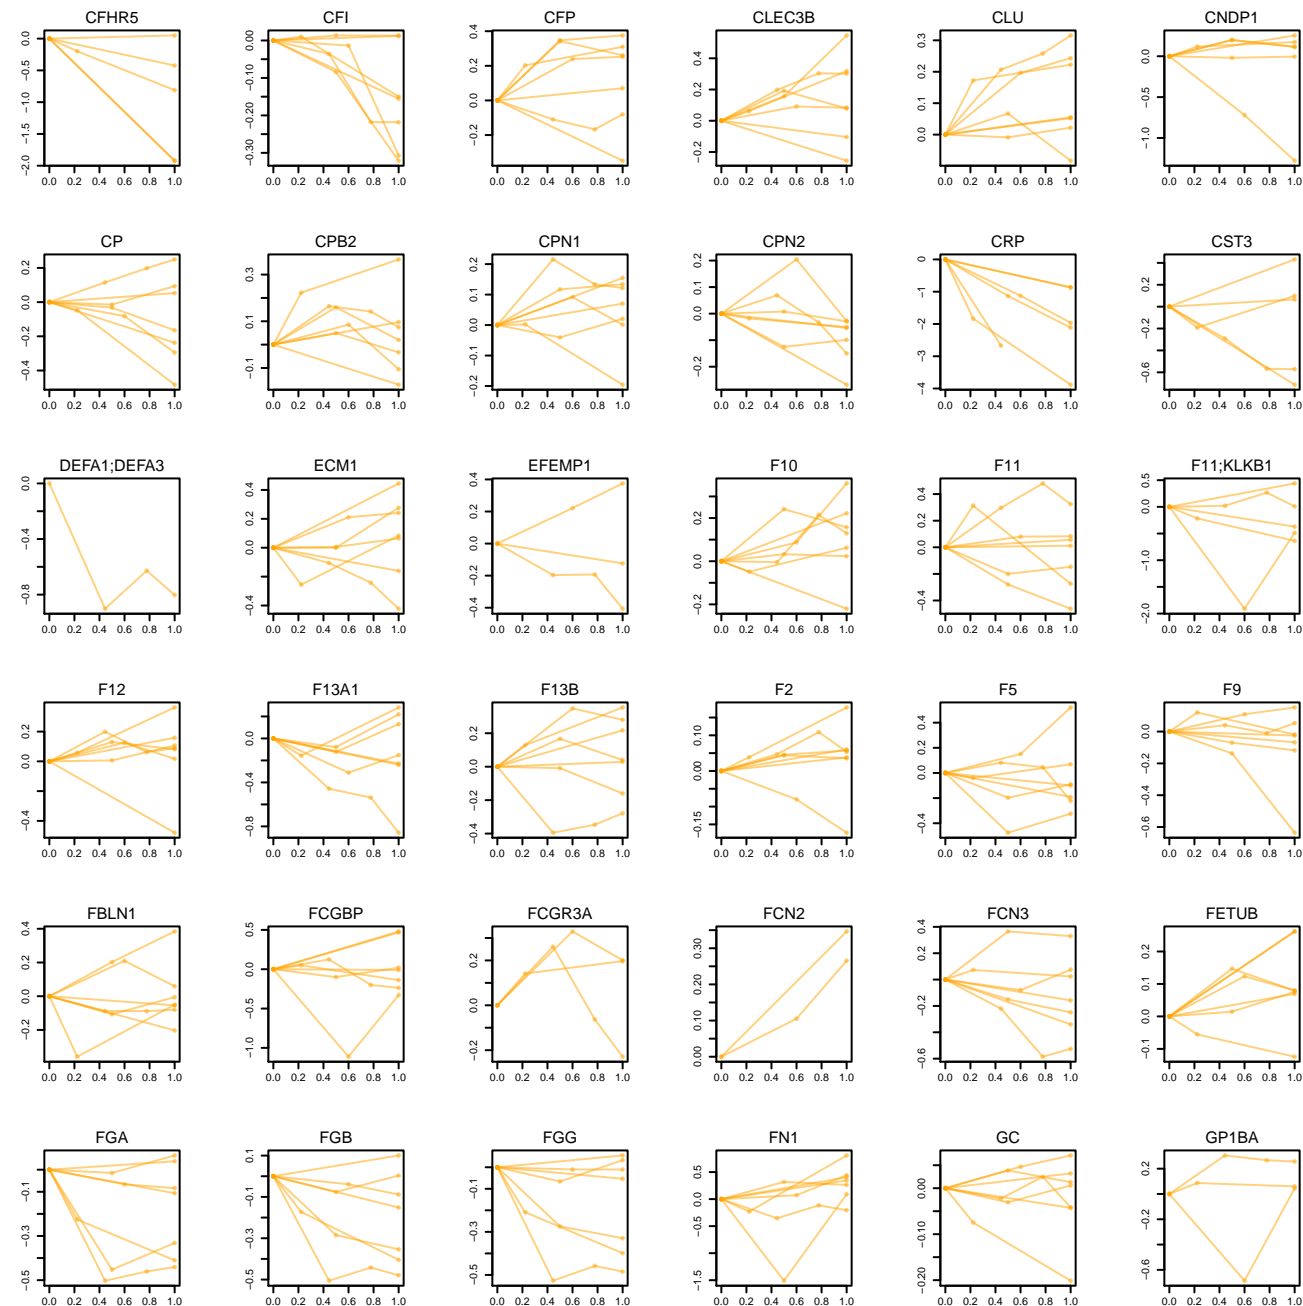

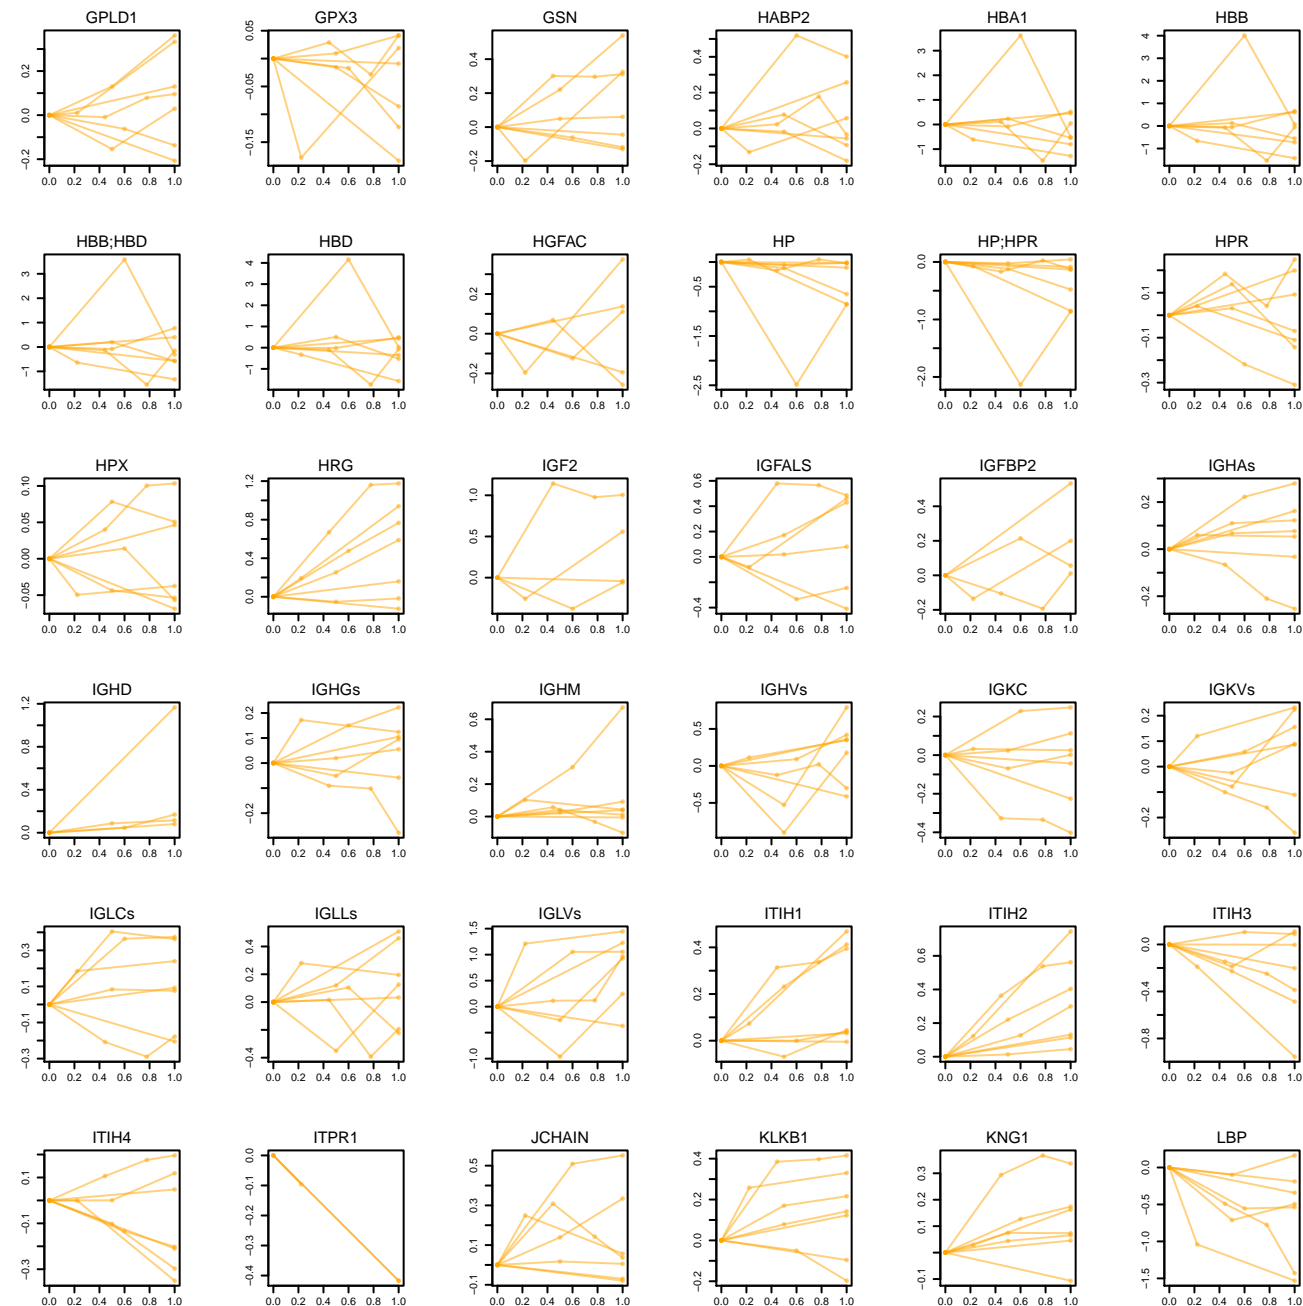

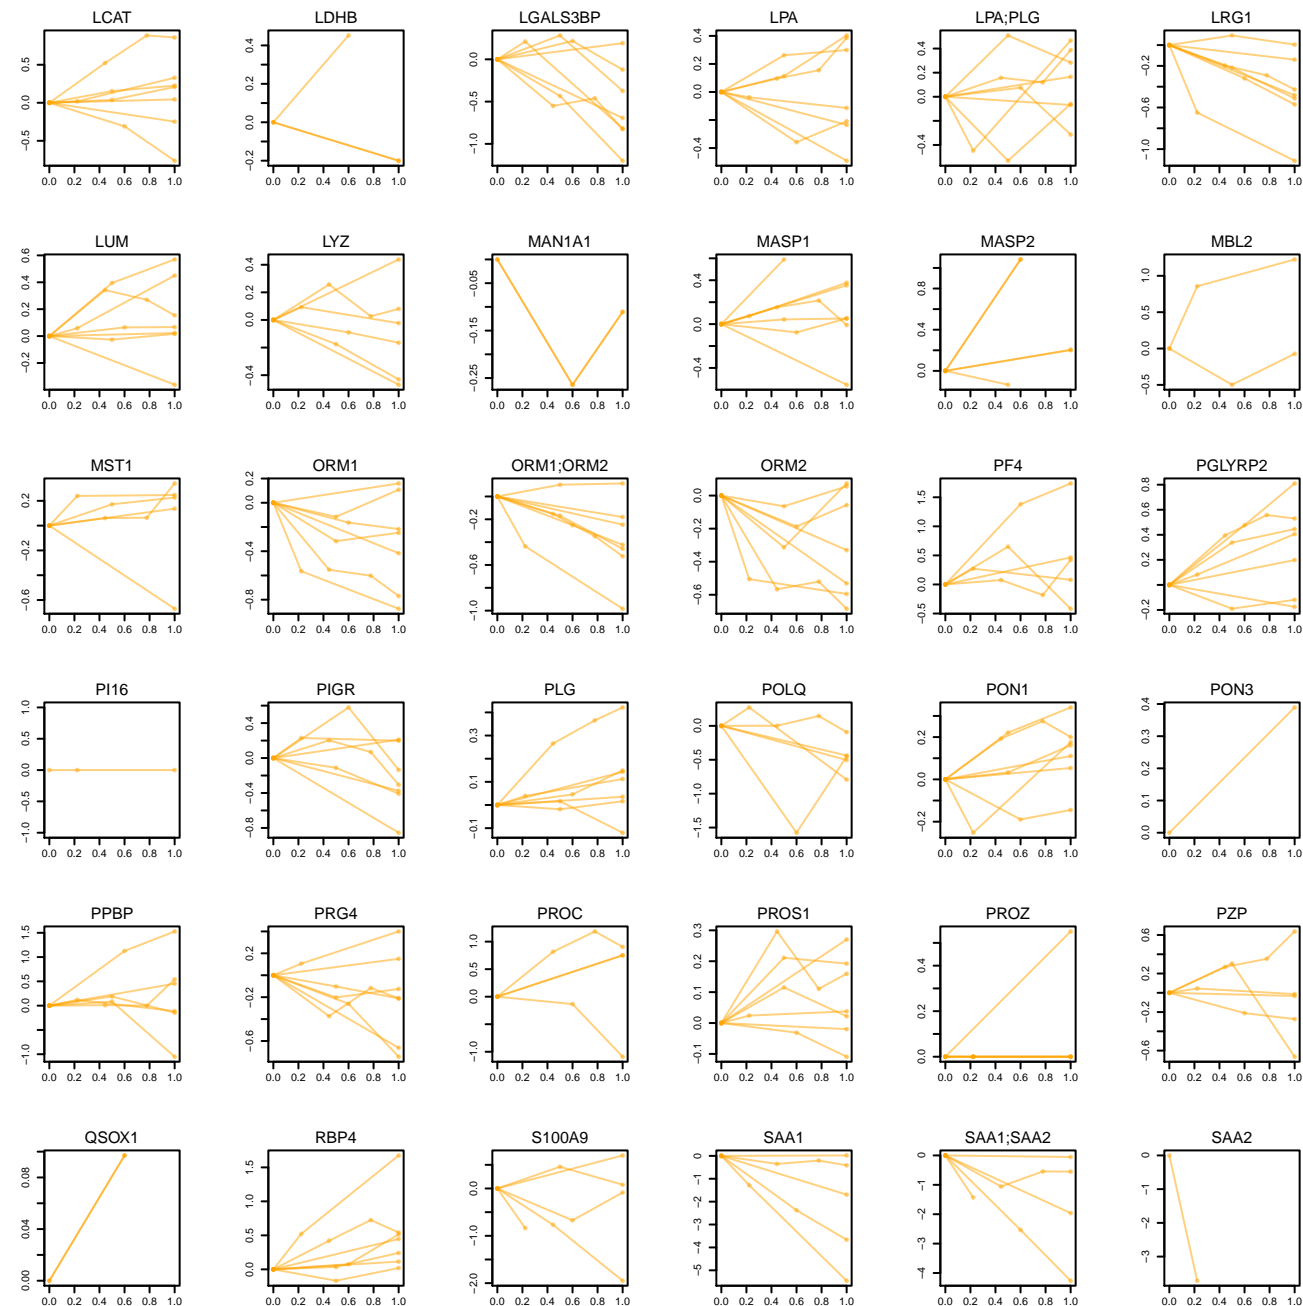

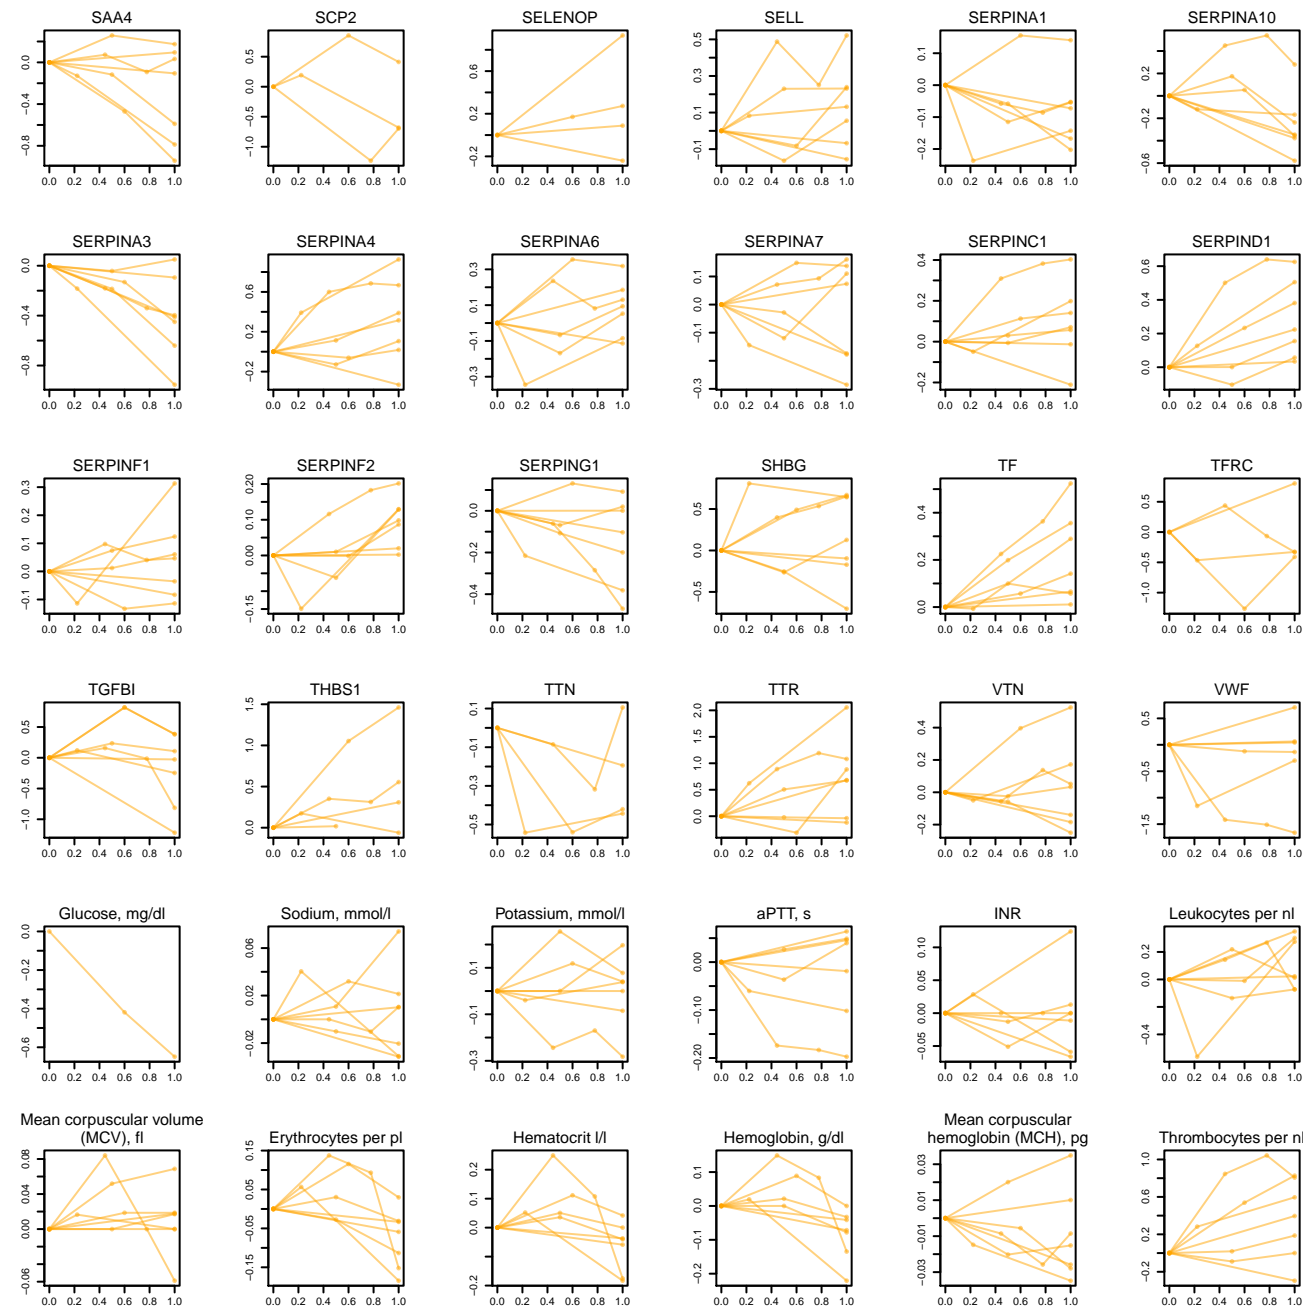

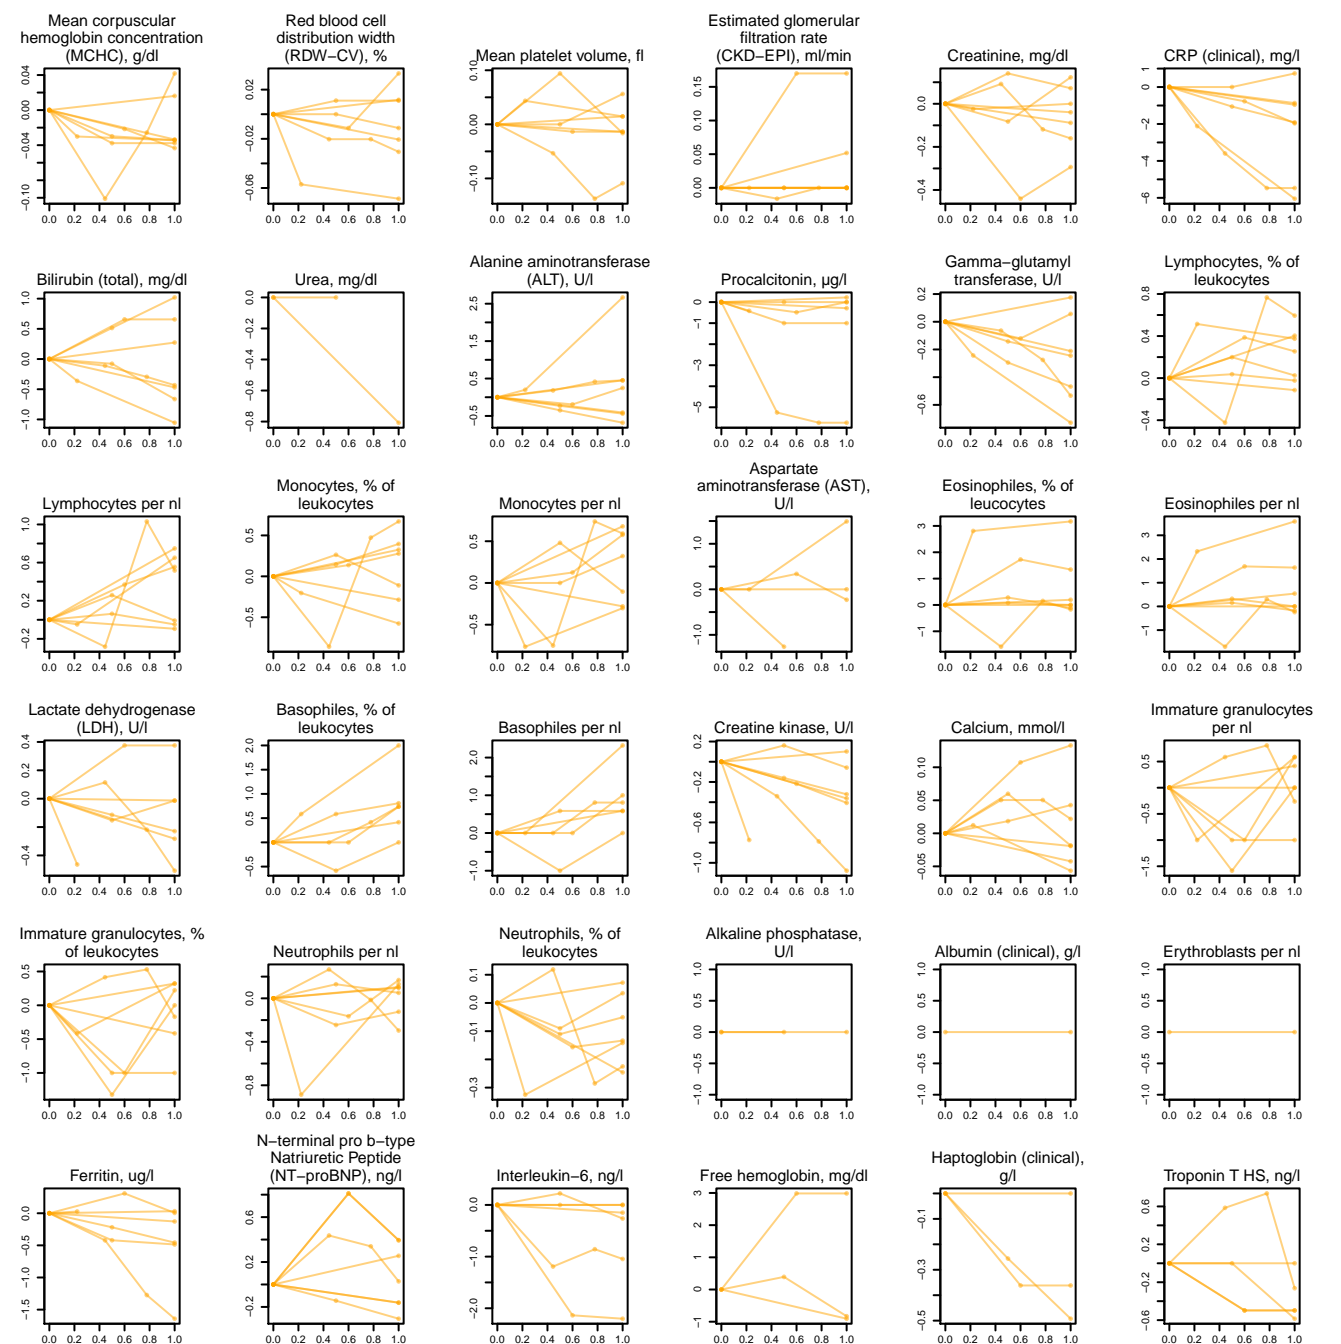

CD169/Siglec-1 antigens  
per monocyte

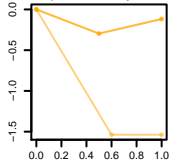

CD169+ monocytes, % of  
monocytes

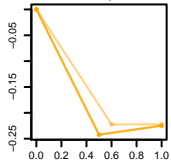

Neutrophil-to-lymphocyte  
ratio

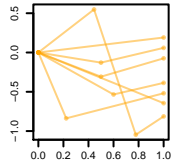

Age

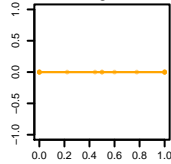

BMI

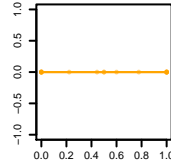

Charlson score

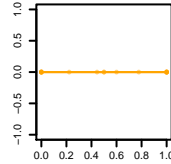

FiO2

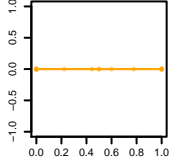

P.Severity

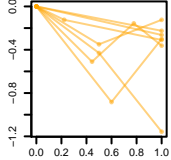

Supplement: Supplementary file [file media-1.zip]
